# Supplementary material for: Bioprospection of Tenellins Produced by the Entomopathogenic Fungus Beauveria neobassiana
Source: MDPI journal article supplement (doi:10.3390/jof10010069), 2024-01-15
Supplement: s1 [file s1]

# **Supplementary Materials for**

## **Bioprospection of Tenellins Produced by the Entomopathogenic Fungus *Beauveria neobassiana***

Rita Toshe <sup>1,2</sup>, Esteban Charria-Girón <sup>1,2</sup>, Artit Khonsanit <sup>4</sup>, J. Jennifer Luangsa-ard <sup>4</sup>, Syeda J. Khalid <sup>1,3</sup>, Hedda Schrey <sup>1,2</sup>, Sherif S. Ebada <sup>1,4,\*</sup>, and Marc Stadler <sup>1,2,\*</sup>

<sup>1</sup> Department of Microbial Drugs, Helmholtz Centre for Infection Research GmbH (HZI),  
Inhoffenstraße 7, 38124 Braunschweig, Germany; rita.toshe@helmholtz-hzi.de;  
esteban.charriagiron@helmholtz-hzi.de

<sup>2</sup> Institut für Pharmazeutische Biologie, Universität des Saarlandes, Campus C2 3, 66123  
Saarbrücken, Germany

<sup>3</sup> Institute of Microbiology, Technische Universität Braunschweig, Spielmannstraße 7,  
38106 Braunschweig, Germany

<sup>4</sup> National Center for Genetic Engineering and Biotechnology (BIOTEC), National Science  
and Technology Development Agency (NSTDA), 111 Thailand Science Park, Phahonyothin  
Road, Khlong Nueng, Khlong Luang, Pathum Thani 12120, Thailand

<sup>5</sup> Department of Pharmacognosy, Faculty of Pharmacy, Ain Shams University, 11566 Cairo,  
Egypt

\* Correspondence: [sherif.elsayed@helmholtz-hzi.de](mailto:sherif.elsayed@helmholtz-hzi.de); [sherif\\_elsayed@pharma.asu.edu.eg](mailto:sherif_elsayed@pharma.asu.edu.eg)  
(S.S.E.); [Marc.Stadler@helmholtz-hzi.de](mailto:Marc.Stadler@helmholtz-hzi.de) (M.S.); Tel.: +49-531-6181-4240; Fax +49-531-  
6181-9499

## Contents of Supporting Information

| #  | Contents                                                                                                           | Page |
|----|--------------------------------------------------------------------------------------------------------------------|------|
| 1  | Biofilm inhibition assay                                                                                           | S3   |
| 2  | Table S1. Inhibition of biofilm formation of <i>S. aureus</i> by compounds <b>1-6</b> at different concentrations. | S4   |
| 3  | Figure S1. LRESIMS spectra of <b>1</b> .                                                                           | S5   |
| 4  | Figure S2. HRESIMS spectra of <b>1</b> .                                                                           | S6   |
| 5  | Figure S3. <sup>1</sup> H NMR spectrum of <b>1</b> in acetone- <i>d</i> <sub>6</sub> at 500 MHz.                   | S7   |
| 6  | Figure S4. <sup>1</sup> H- <sup>1</sup> H COSY spectrum of <b>1</b> in acetone- <i>d</i> <sub>6</sub> at 500 MHz.  | S8   |
| 7  | Figure S5. HMBC spectrum of <b>1</b> in acetone- <i>d</i> <sub>6</sub> at 500 MHz.                                 | S9   |
| 8  | Figure S6. HSQC spectrum of <b>1</b> in acetone- <i>d</i> <sub>6</sub> at 500 MHz.                                 | S10  |
| 9  | Figure S7. ROESY spectrum of <b>1</b> in acetone- <i>d</i> <sub>6</sub> at 700 MHz.                                | S11  |
| 10 | Figure S8. LRESIMS spectra of <b>2</b> .                                                                           | S12  |
| 11 | Figure S9. HRESIMS spectra of <b>2</b> .                                                                           | S13  |
| 12 | Figure S10. <sup>1</sup> H NMR spectrum of <b>2</b> in DMSO- <i>d</i> <sub>6</sub> at 500 MHz.                     | S14  |
| 13 | Figure S11. <sup>13</sup> C NMR spectrum of <b>2</b> in DMSO- <i>d</i> <sub>6</sub> at 125 MHz.                    | S15  |
| 14 | Figure S12. <sup>1</sup> H- <sup>1</sup> H COSY spectrum of <b>2</b> in DMSO- <i>d</i> <sub>6</sub> at 500 MHz.    | S16  |
| 15 | Figure S13. HMBC spectrum of <b>2</b> in DMSO- <i>d</i> <sub>6</sub> at 500 MHz.                                   | S17  |
| 16 | Figure S14. HSQC spectrum of <b>2</b> in DMSO- <i>d</i> <sub>6</sub> at 500 MHz.                                   | S18  |
| 17 | Figure S15. ROESY spectrum of <b>2</b> in DMSO- <i>d</i> <sub>6</sub> at 700 MHz.                                  | S19  |
| 18 | Figure S16. LRESIMS spectra of <b>3</b> .                                                                          | S20  |
| 19 | Figure S17. HRESIMS spectra of <b>3</b> .                                                                          | S21  |
| 20 | Figure S18. <sup>1</sup> H NMR spectrum of <b>3</b> in DMSO- <i>d</i> <sub>6</sub> at 500 MHz.                     | S22  |
| 21 | Figure S19. <sup>1</sup> H- <sup>1</sup> H COSY spectrum of <b>3</b> in DMSO- <i>d</i> <sub>6</sub> at 500 MHz.    | S23  |
| 22 | Figure S20. HMBC spectrum of <b>3</b> in DMSO- <i>d</i> <sub>6</sub> at 500 MHz.                                   | S24  |
| 23 | Figure S21. HSQC spectrum of <b>3</b> in DMSO- <i>d</i> <sub>6</sub> at 500 MHz.                                   | S25  |
| 24 | Figure S22. LRESIMS spectra of <b>4</b> .                                                                          | S26  |
| 25 | Figure S23. HRESIMS spectra of <b>4</b> .                                                                          | S27  |
| 26 | Figure S24. <sup>1</sup> H NMR spectrum of <b>4</b> in DMSO- <i>d</i> <sub>6</sub> at 500 MHz.                     | S28  |
| 27 | Figure S25. <sup>1</sup> H- <sup>1</sup> H COSY spectrum of <b>4</b> in DMSO- <i>d</i> <sub>6</sub> at 500 MHz.    | S29  |
| 28 | Figure S26. LRESIMS of <b>5</b> .                                                                                  | S30  |
| 29 | Figure S27. HRESIMS of <b>5</b> .                                                                                  | S31  |
| 30 | Figure S28. <sup>1</sup> H NMR spectrum of <b>5</b> in DMSO- <i>d</i> <sub>6</sub> at 500 MHz.                     | S32  |
| 31 | Figure S29. <sup>1</sup> H- <sup>1</sup> H COSY spectrum of <b>5</b> in DMSO- <i>d</i> <sub>6</sub> at 500 MHz.    | S33  |
| 32 | Figure S30. HSQC spectrum of <b>5</b> in DMSO- <i>d</i> <sub>6</sub> at 500 MHz.                                   | S34  |
| 33 | Figure S31. HRESIMS of <b>6</b> .                                                                                  | S35  |
| 34 | Figure S32. <sup>1</sup> H NMR spectrum of <b>6</b> in DMSO- <i>d</i> <sub>6</sub> at 500 MHz.                     | S36  |
| 35 | Figure S33. <sup>1</sup> H- <sup>1</sup> H COSY spectrum of <b>6</b> in DMSO- <i>d</i> <sub>6</sub> at 500 MHz.    | S37  |
| 36 | Figure S34. HMBC spectrum of <b>6</b> in DMSO- <i>d</i> <sub>6</sub> at 500 MHz.                                   | S38  |
| 37 | Figure S35. HSQC spectrum of <b>6</b> in DMSO- <i>d</i> <sub>6</sub> at 500 MHz.                                   | S39  |

## Biofilm inhibition assay

Biofilm inhibition assays were conducted according to the methodology previously described (Soliga *et al.*, 2021), targeting the inhibition of biofilm formation in *Staphylococcus aureus* (DSM 1104).

*S. aureus* were cultured in LB and CASO medium at 37 °C for 18 h, respectively, in a shaker at 120 rpm after being thawed from a -20 °C stock solution. The culture's optical density at 600 nm (OD<sub>600</sub>) was measured and adjusted to a 0.1 McFarland standard in M63 minimal medium supplemented with necessary nutrients and CASO medium with 4% glucose for *S. aureus*, respectively. Microtiter plates were loaded with 150 µL of the bacterial suspension containing serially diluted test compounds (7.8 -125 µg/mL) and incubated for 24 h at 37 °C. The evaluation of biofilm inhibition was performed by staining the biofilm with 0.1% crystal violet (CV). After staining, the plates were washed, and the biofilm dissolved in 95% ethanol. The absorbance of the dissolved biofilm was measured at 530 nm using a plate reader. Negative control involved methanol (2.5%) while microporenic acid A at a concentration range of 7.8 to 125 µg/mL were used as the positive control for *S. aureus* (Chepkirui *et al.*, 2018). All experiments were performed three times, and the standard deviation (SD) was maintained at or below 15% for *S. aureus*.

Differences between samples and the control group were determined by a two-tailed Student's *t*-test. Statistical significance was defined as  $p < 0.01$ . Analysis was carried out using GraphPad Prism 9<sup>®</sup> (GraphPad Software, San Diego, CA, USA).

## References

Chepkirui, C.; Yuyama, K.T.; Wanga, L.A.; Decock, C.; Matasyoh, J.C.; Abraham, W.R.; Stadler, M. Microporenic acids A-G, biofilm inhibitors, and antimicrobial agents from the Basidiomycete *Microporus* Species. *J. Nat. Prod.* **2018**, *81*, 778-784.

Soliga, KJ.; Bär, SI.; Oberhuber, N.; Zeng, H.; Schrey, H.; Schobert, R. Synthesis and bioactivity of ancorinoside B, A marine diglycosyl tetramic acid. *Mar. Drugs*. **2021**, *19*, 583.

**Table S1.** Inhibition of biofilm formation of *S. aureus* by compounds **1-6** at different concentrations.

| Tested organism             | Conc.<br>(µg/ml) | Biofilm inhibition (% ±SD) |         |        |         |         |         | Microporenic<br>acid A<br>(MAA) |
|-----------------------------|------------------|----------------------------|---------|--------|---------|---------|---------|---------------------------------|
|                             |                  | 1                          | 2       | 3      | 4       | 5       | 6       |                                 |
| <i>S. aureus</i> (DSM 1104) | 125              | 74 ± 5                     | 84 ± 17 | 83 ± 6 | 78 ± 5  | 86 ± 1  | 64 ± 14 | 86 ± 0                          |
|                             | 62.5             | 63 ± 16                    | 83 ± 9  | 83 ± 6 | 80 ± 4  | 85 ± 2  | 48 ± 5  | 84 ± 1                          |
|                             | 31.25            | 46 ± 9                     | 80 ± 10 | 79 ± 8 | 73 ± 15 | 78 ± 5  | -       | 85 ± 1                          |
|                             | 15.62            | -                          | 56 ± 8  | 52 ± 6 | 51 ± 19 | 47 ± 12 | -       | 70 ± 13                         |
|                             | 7.8              | -                          | 53 ± 7  | 37 ± 7 | 36 ± 13 | -       | -       | 41 ± 9                          |



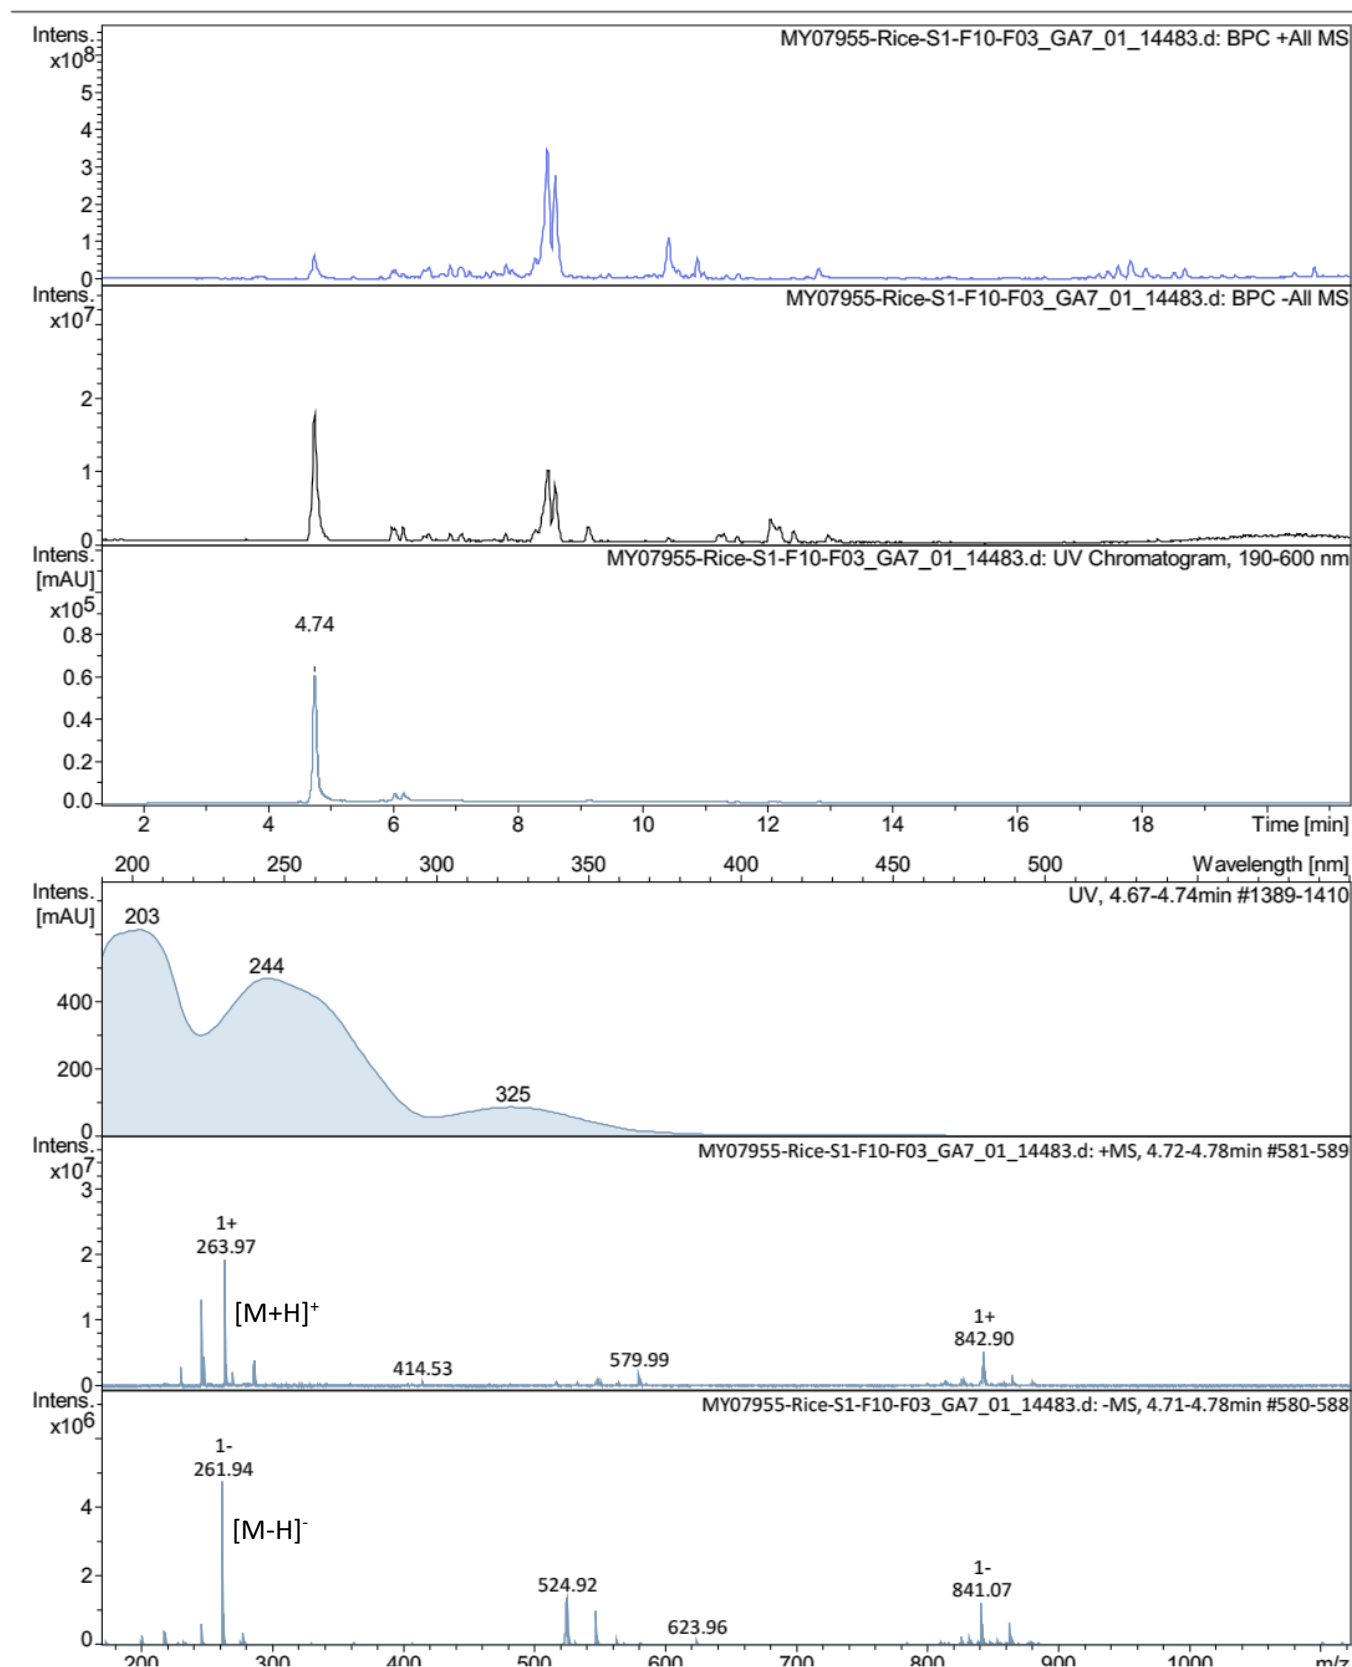

**Figure S1. LRESIMS of 1.**

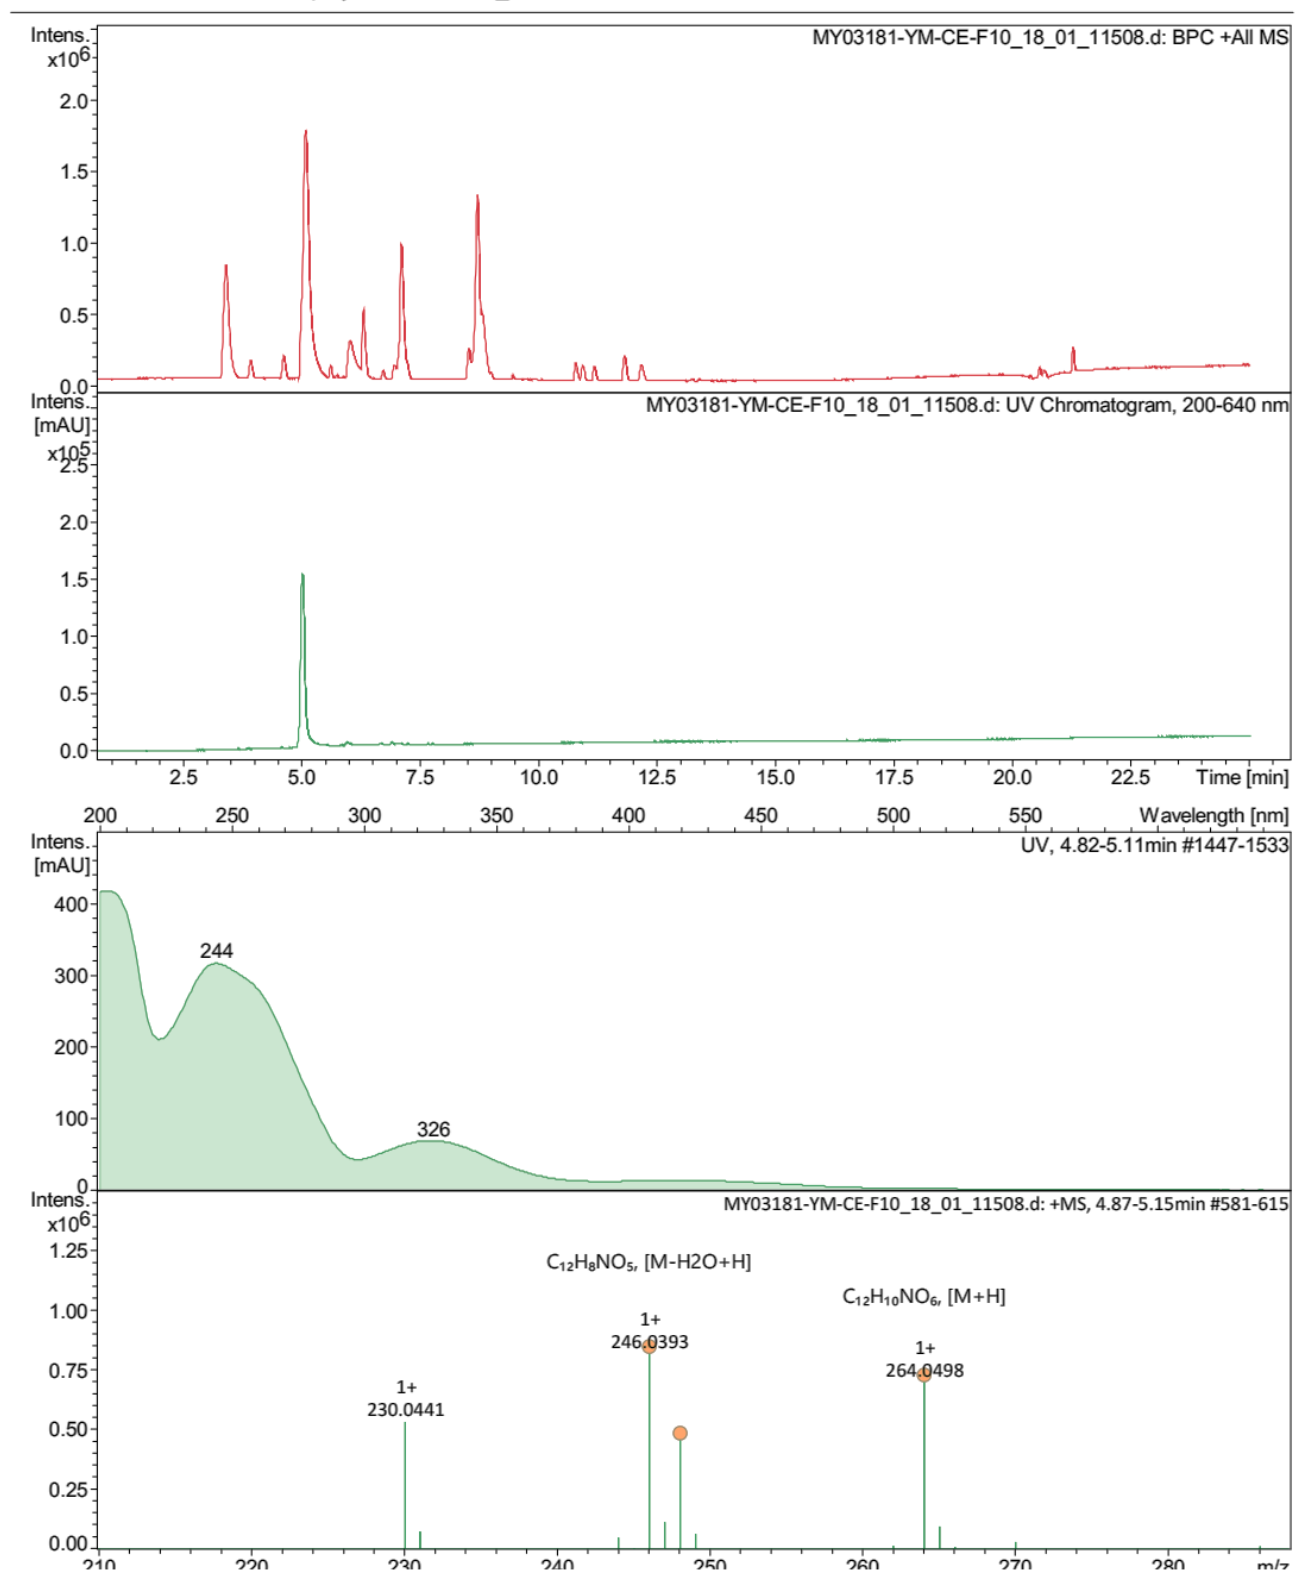

**Figure S2. HRESIMS of 1.**

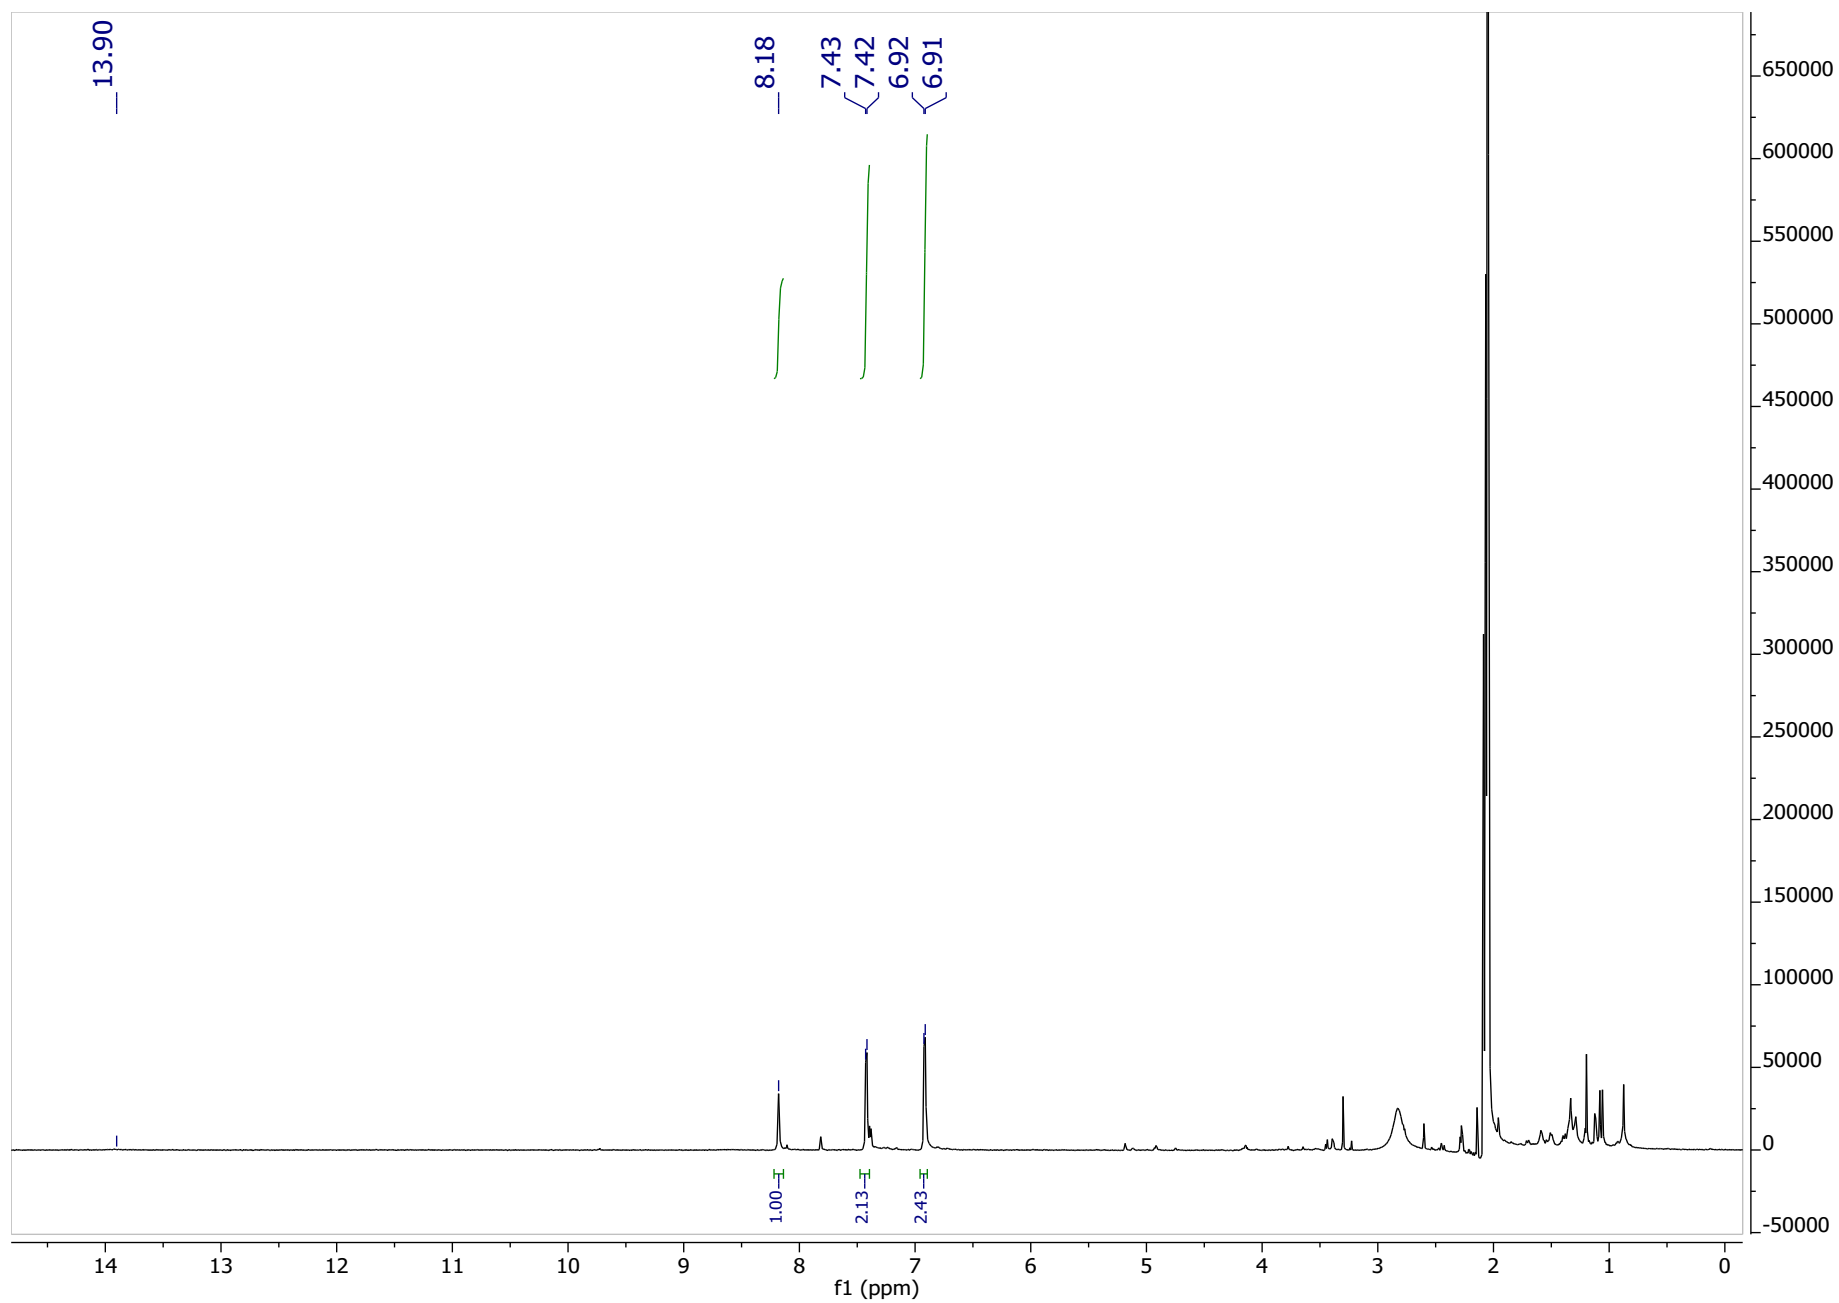

**Figure S3.** <sup>1</sup>H NMR spectrum of **1** in acetone-*d*<sub>6</sub> at 500 MHz.

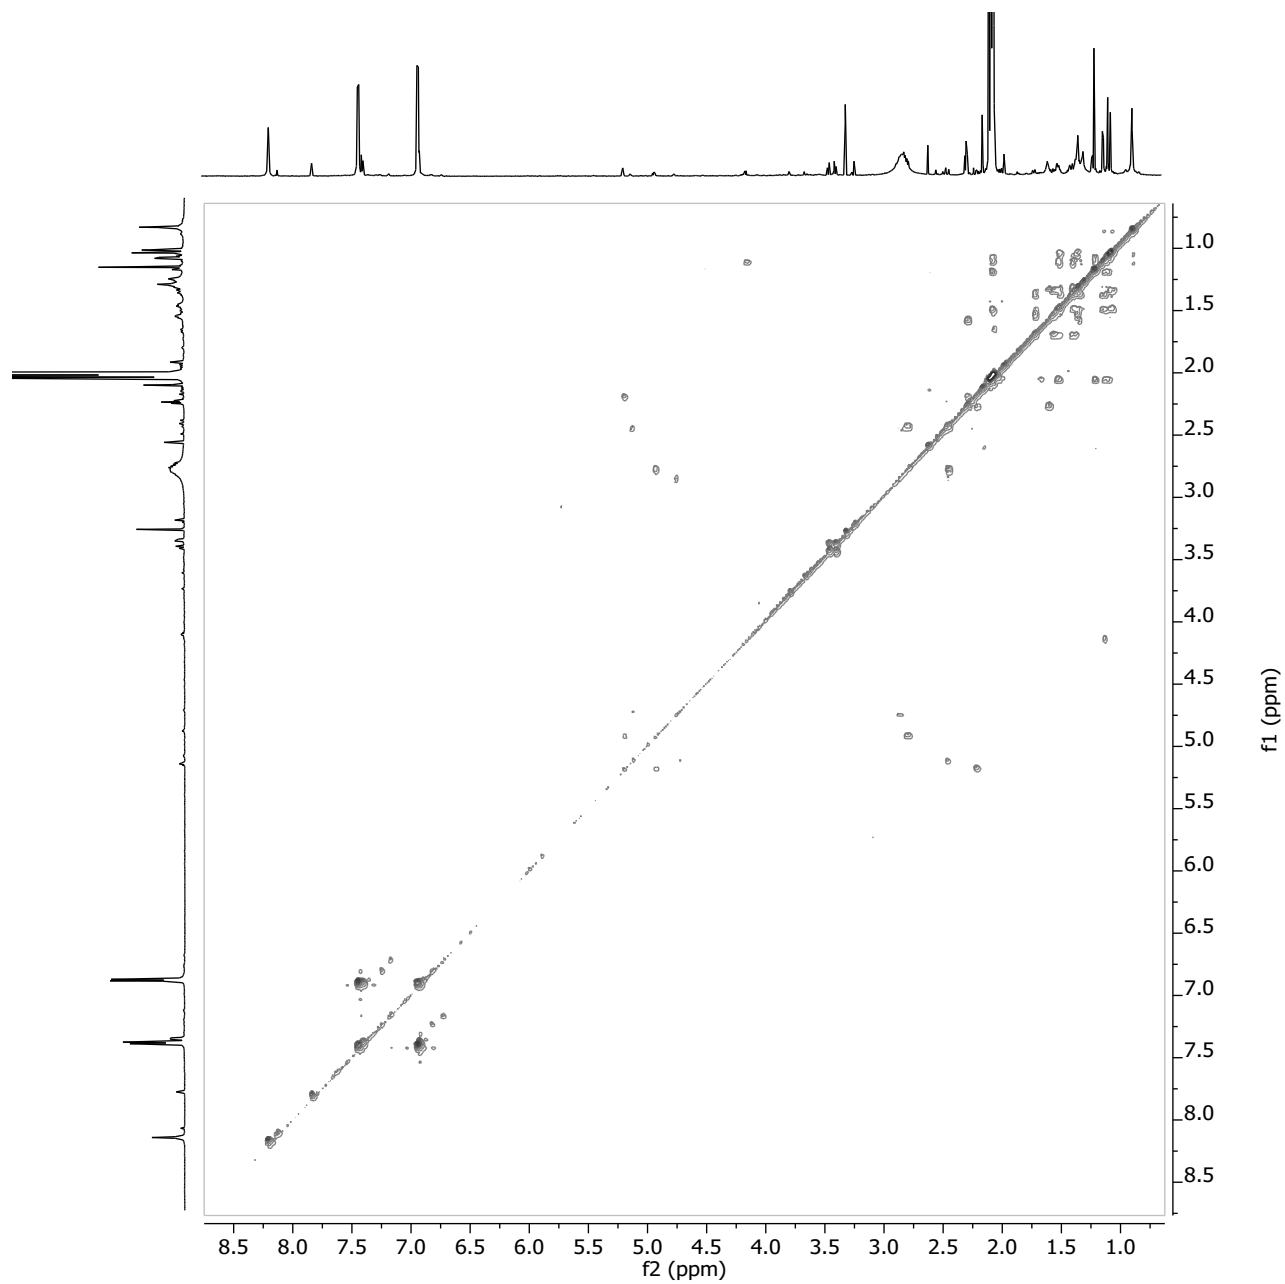

**Figure S4.**  $^1\text{H}$ - $^1\text{H}$  COSY spectrum of **1** in acetone- $d_6$  at 500 MHz.

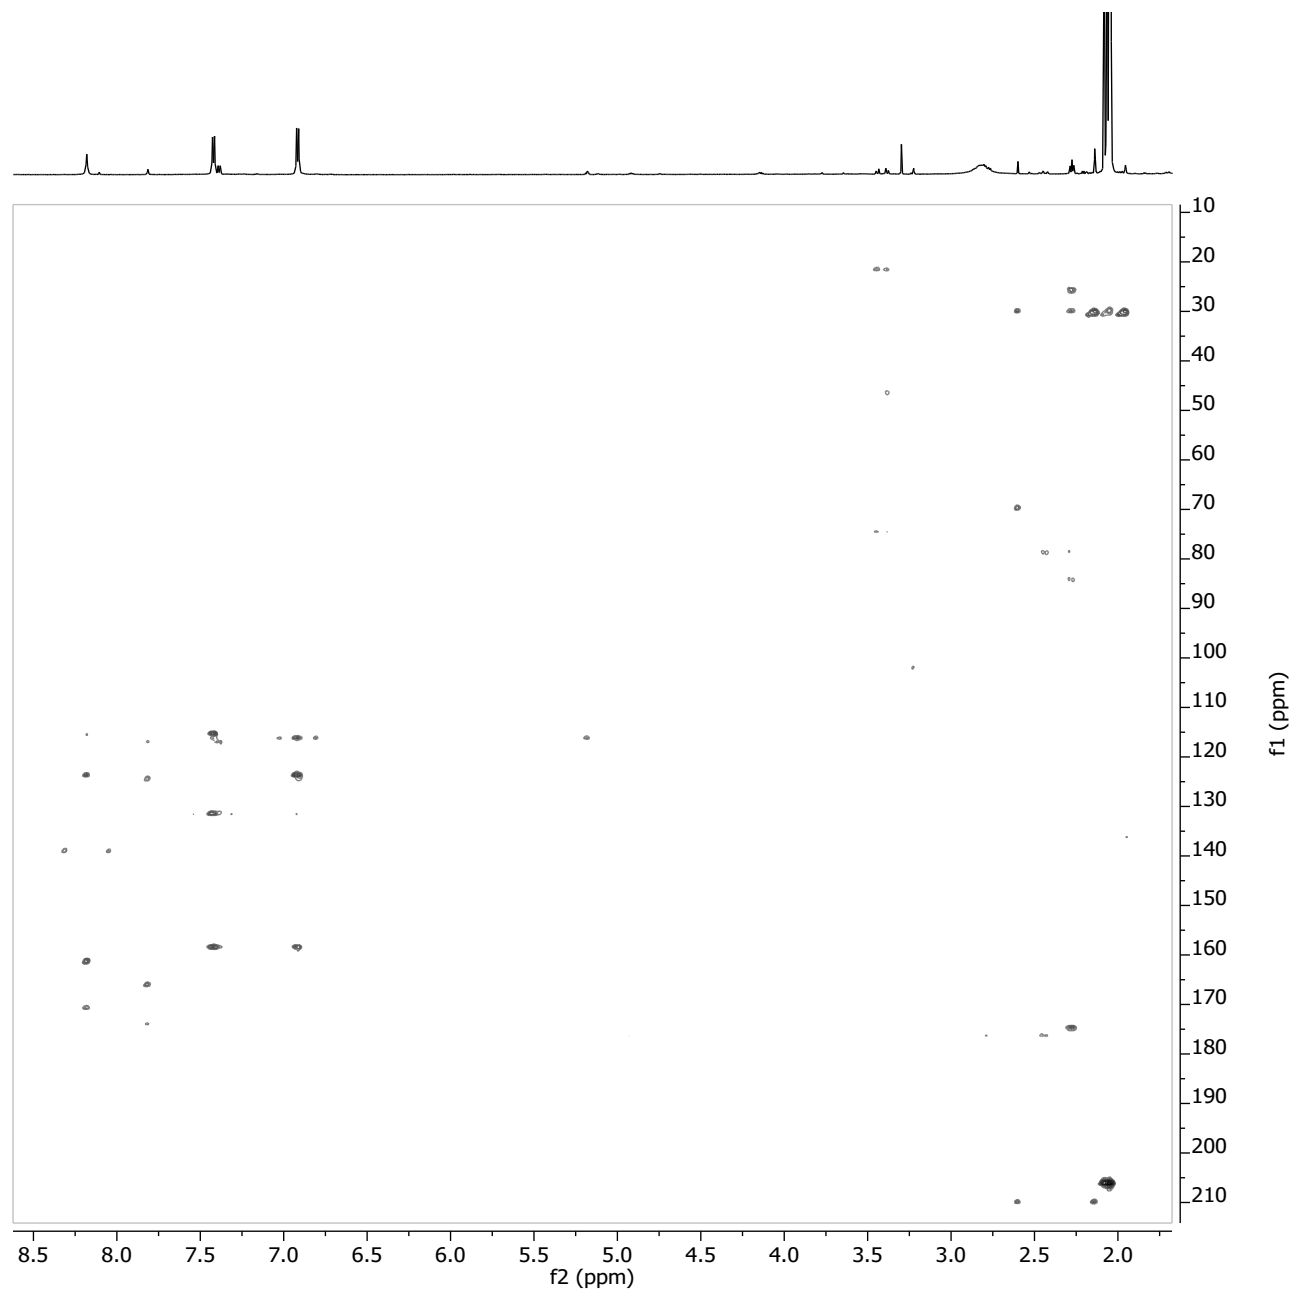

**Figure S5.** HMBC spectrum of **1** in acetone- $d_6$  at 500 MHz.

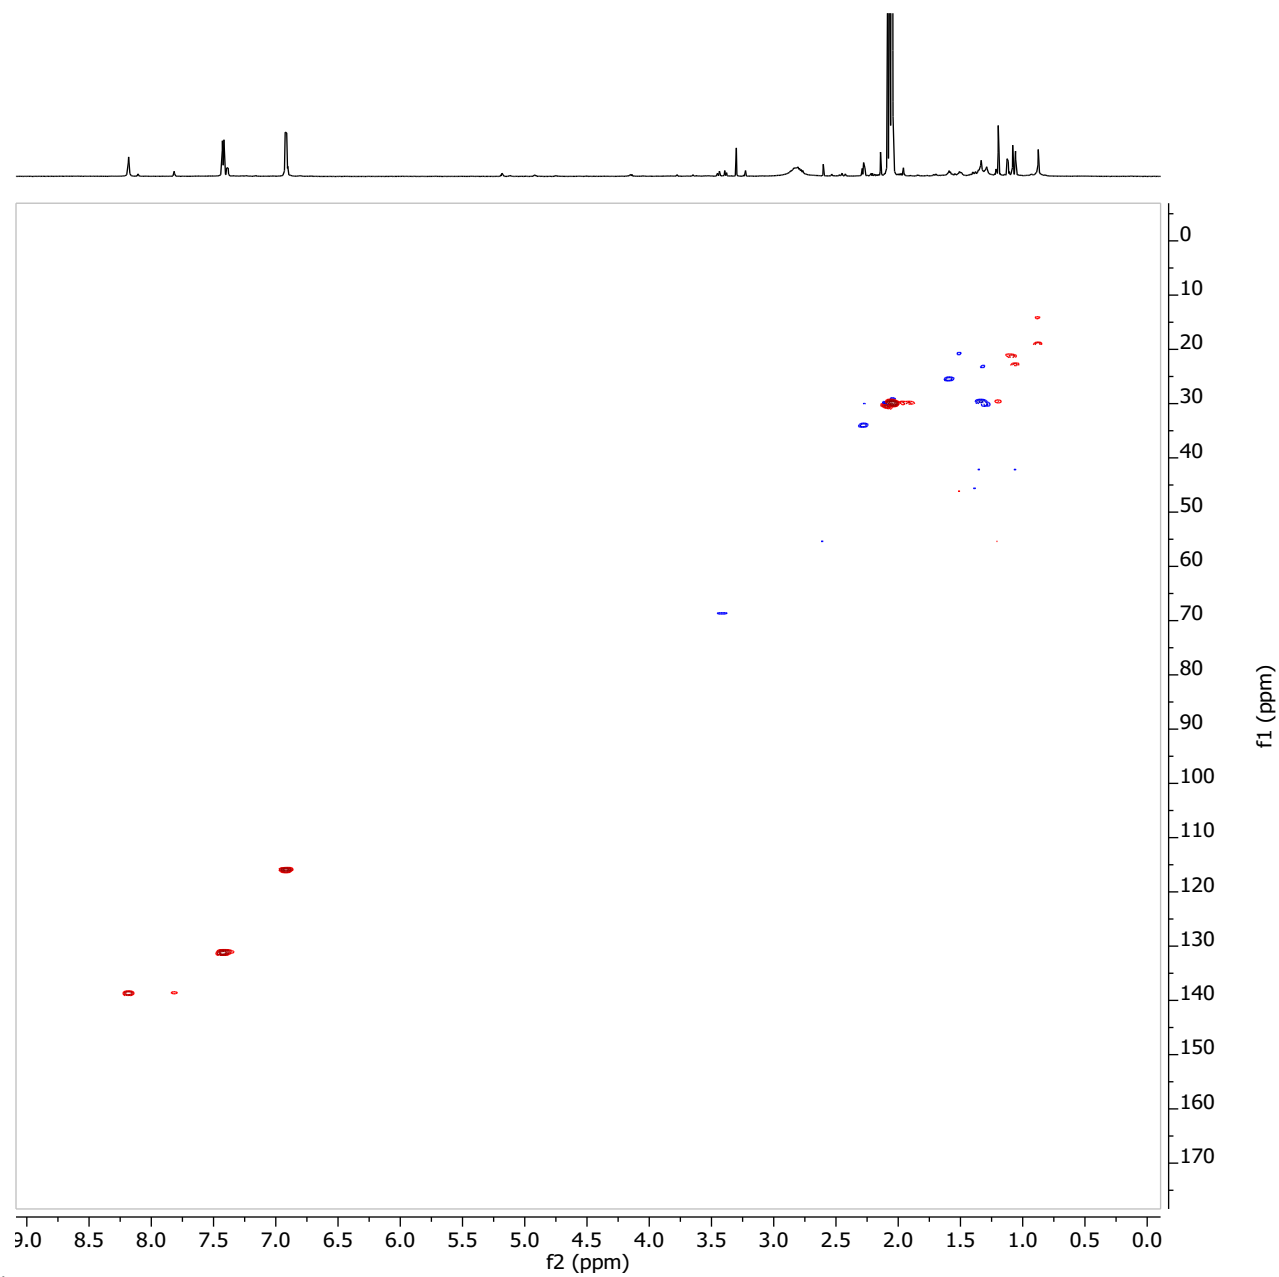

**Figure S6.** HSQC spectrum of **1** in acetone- $d_6$  at 500 MHz.

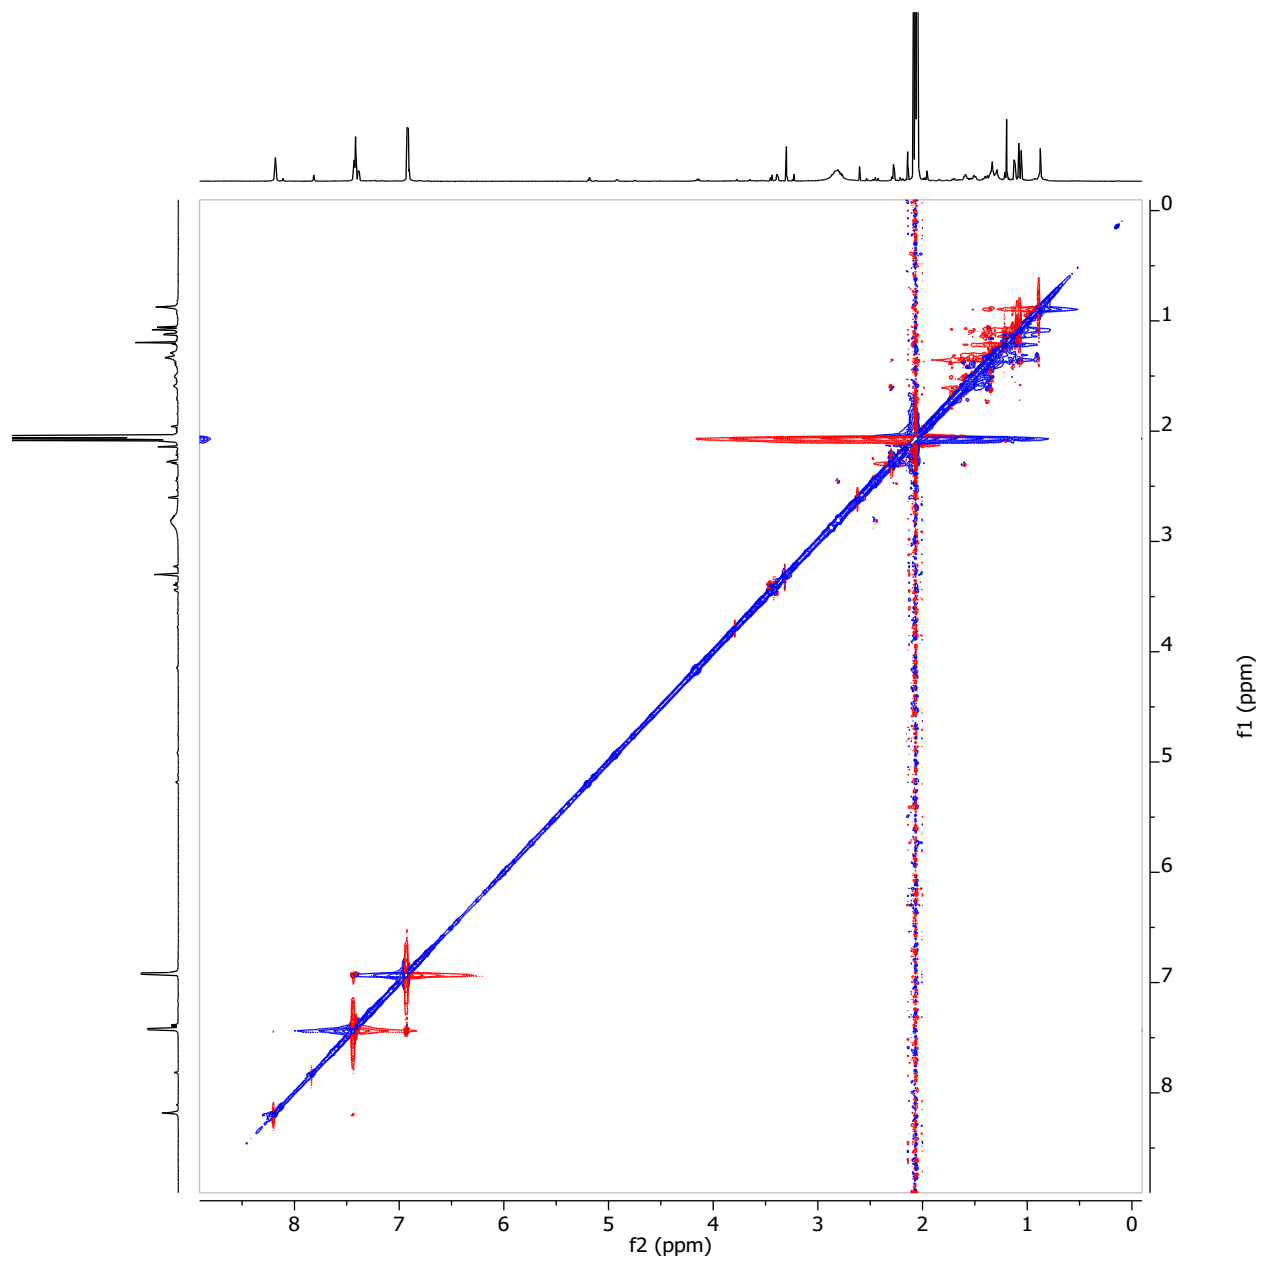

**Figure S7.** ROESY spectrum of **1** in acetone- $d_6$  at 700 MHz.

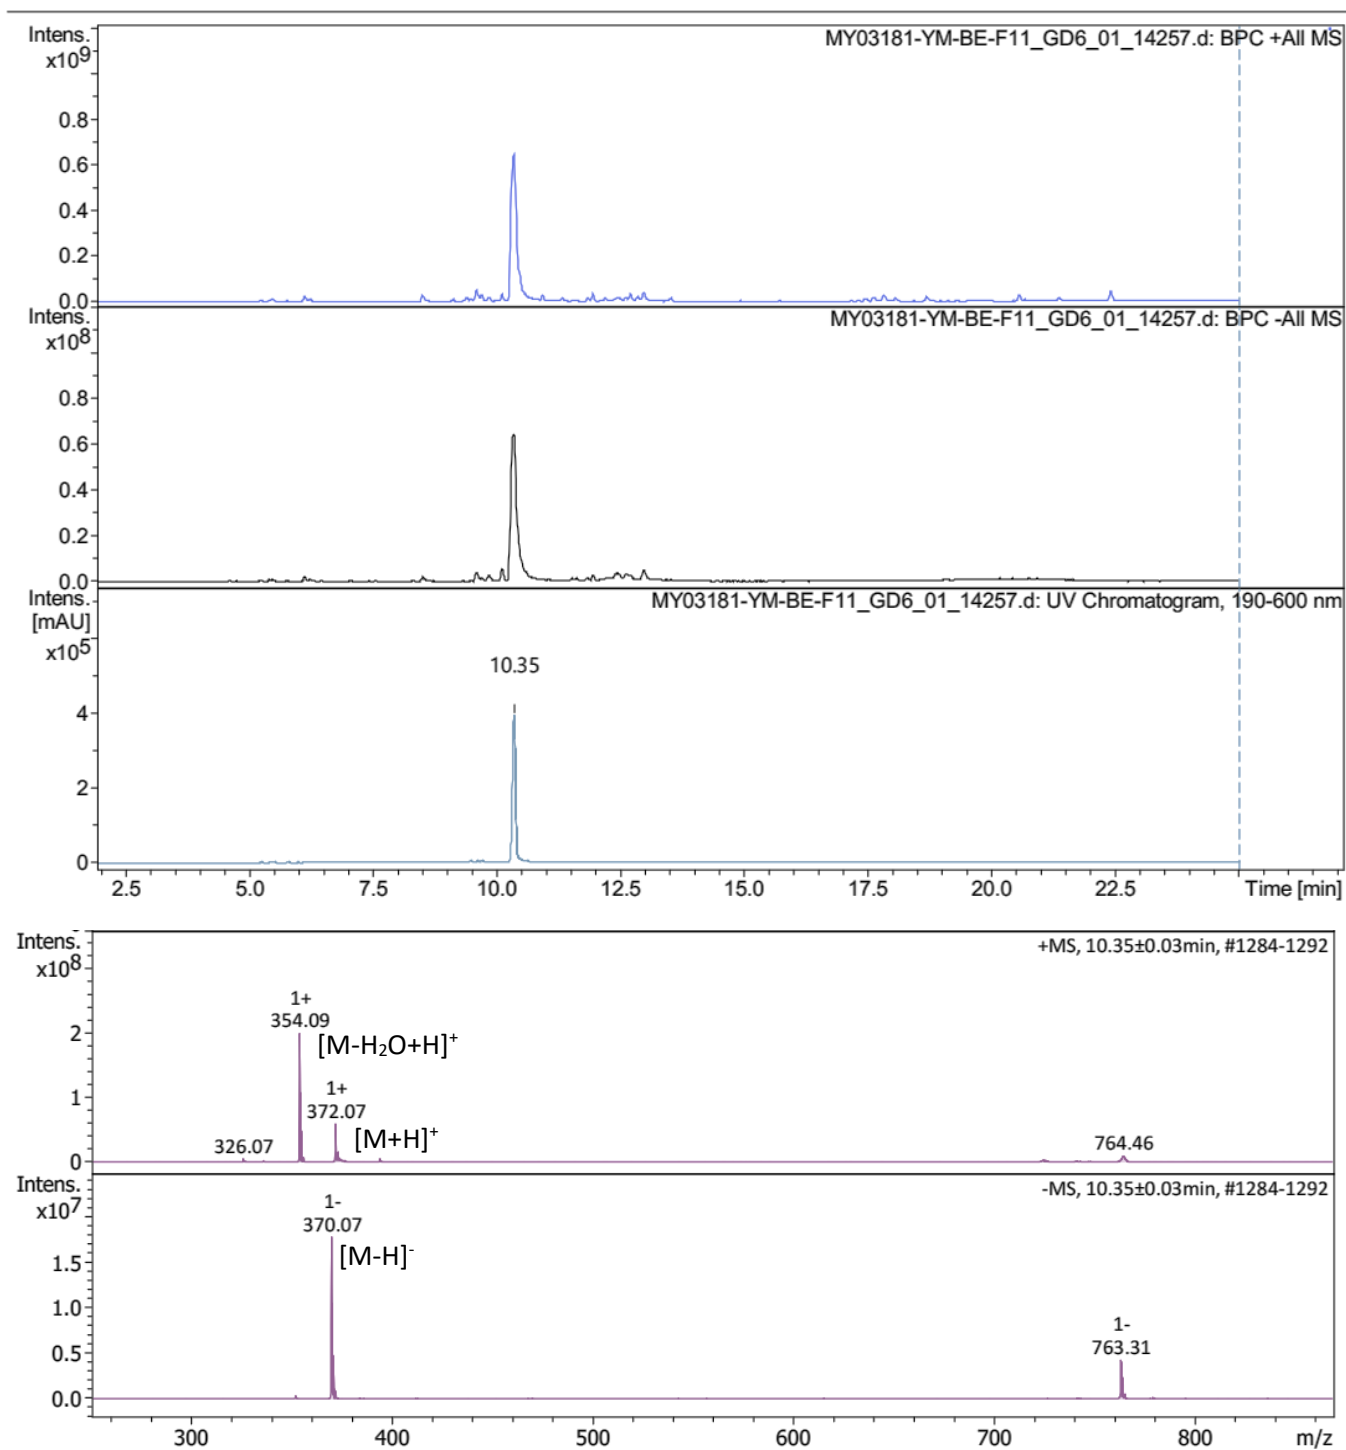

**Figure S8. LRESIMS of 2.**



## Generic Display Report

### Analysis Info

Analysis Name S:\DATA\MaXis\lto20\_Rita Toshe\23\_05\23\_05\_27\MY03181-YM-BE-F11\_90\_01\_11713.d  
Method pos\_säure\_10000\_screening\_ms\_100\_2500\_line.m  
Sample Name MY03181-YM-BE-F11  
Comment Screening01  
Waters Acquity UPLC BEH C<sub>18</sub> 1,7µm 2.1x50mm

Acquisition Date 28.05.2023 07:28:36

Operator ate06

Instrument maXis

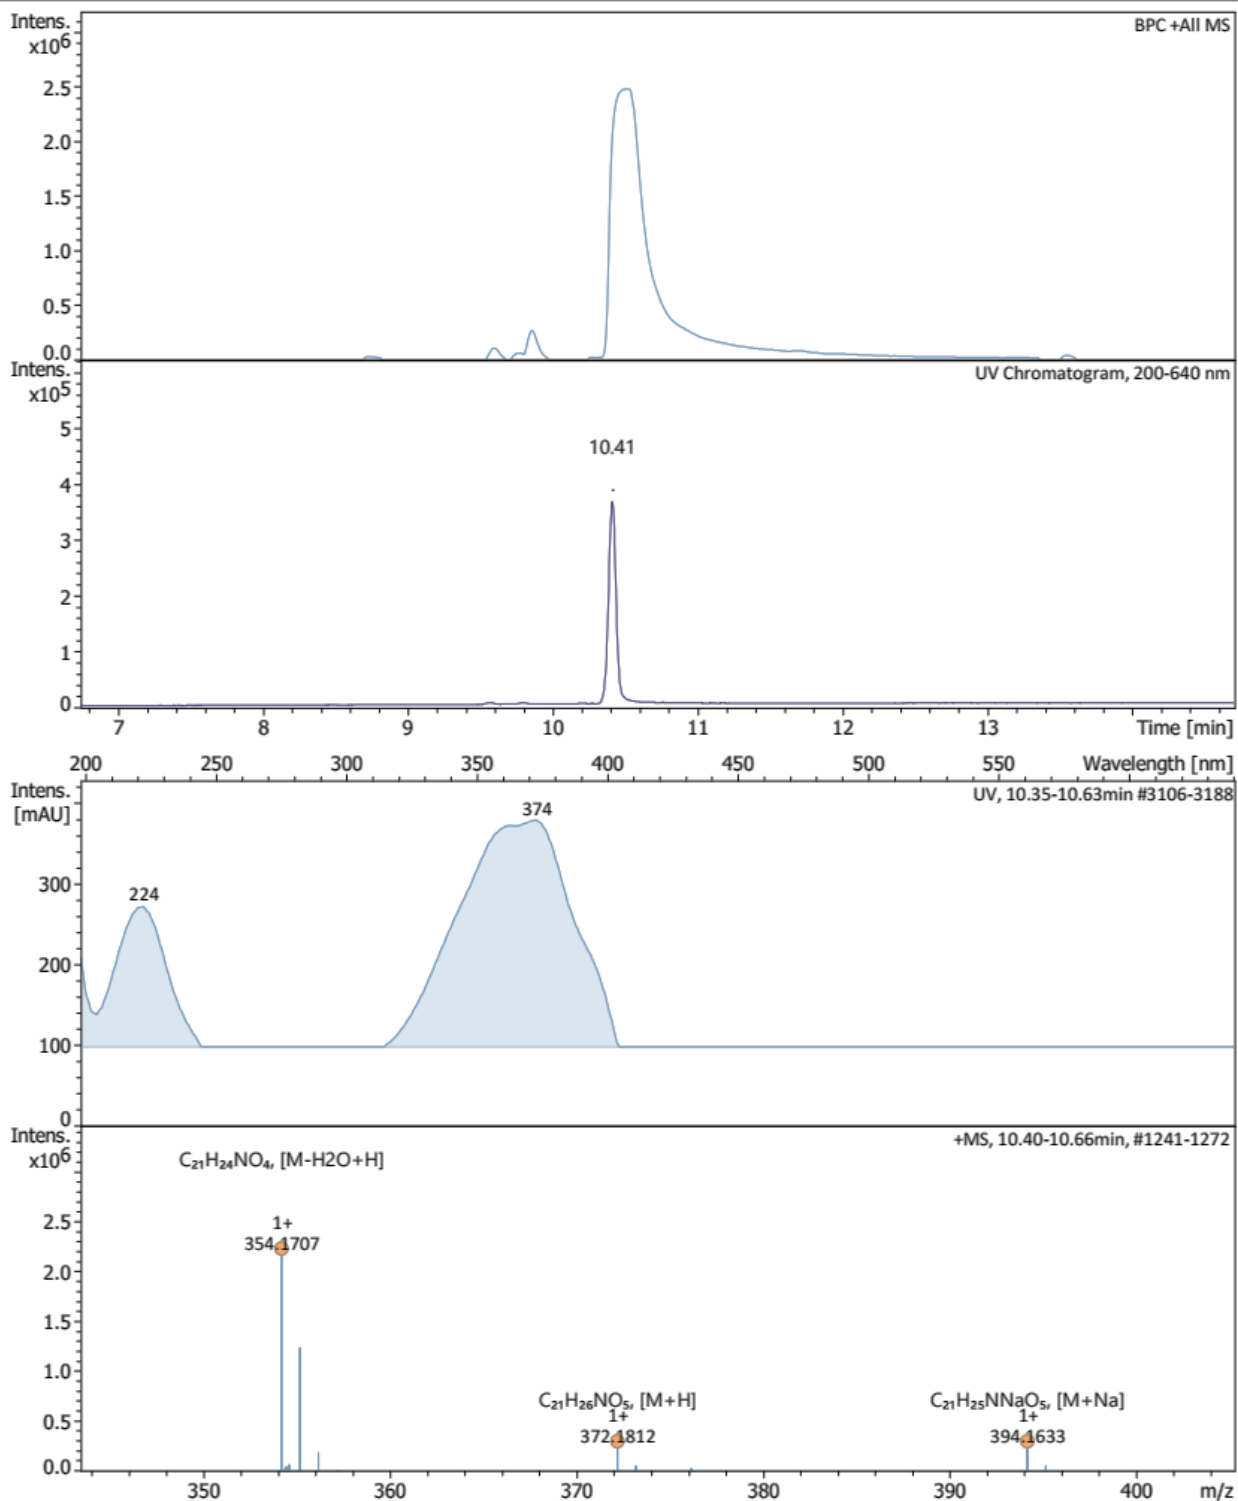

Figure S9. HRESIMS of 2.

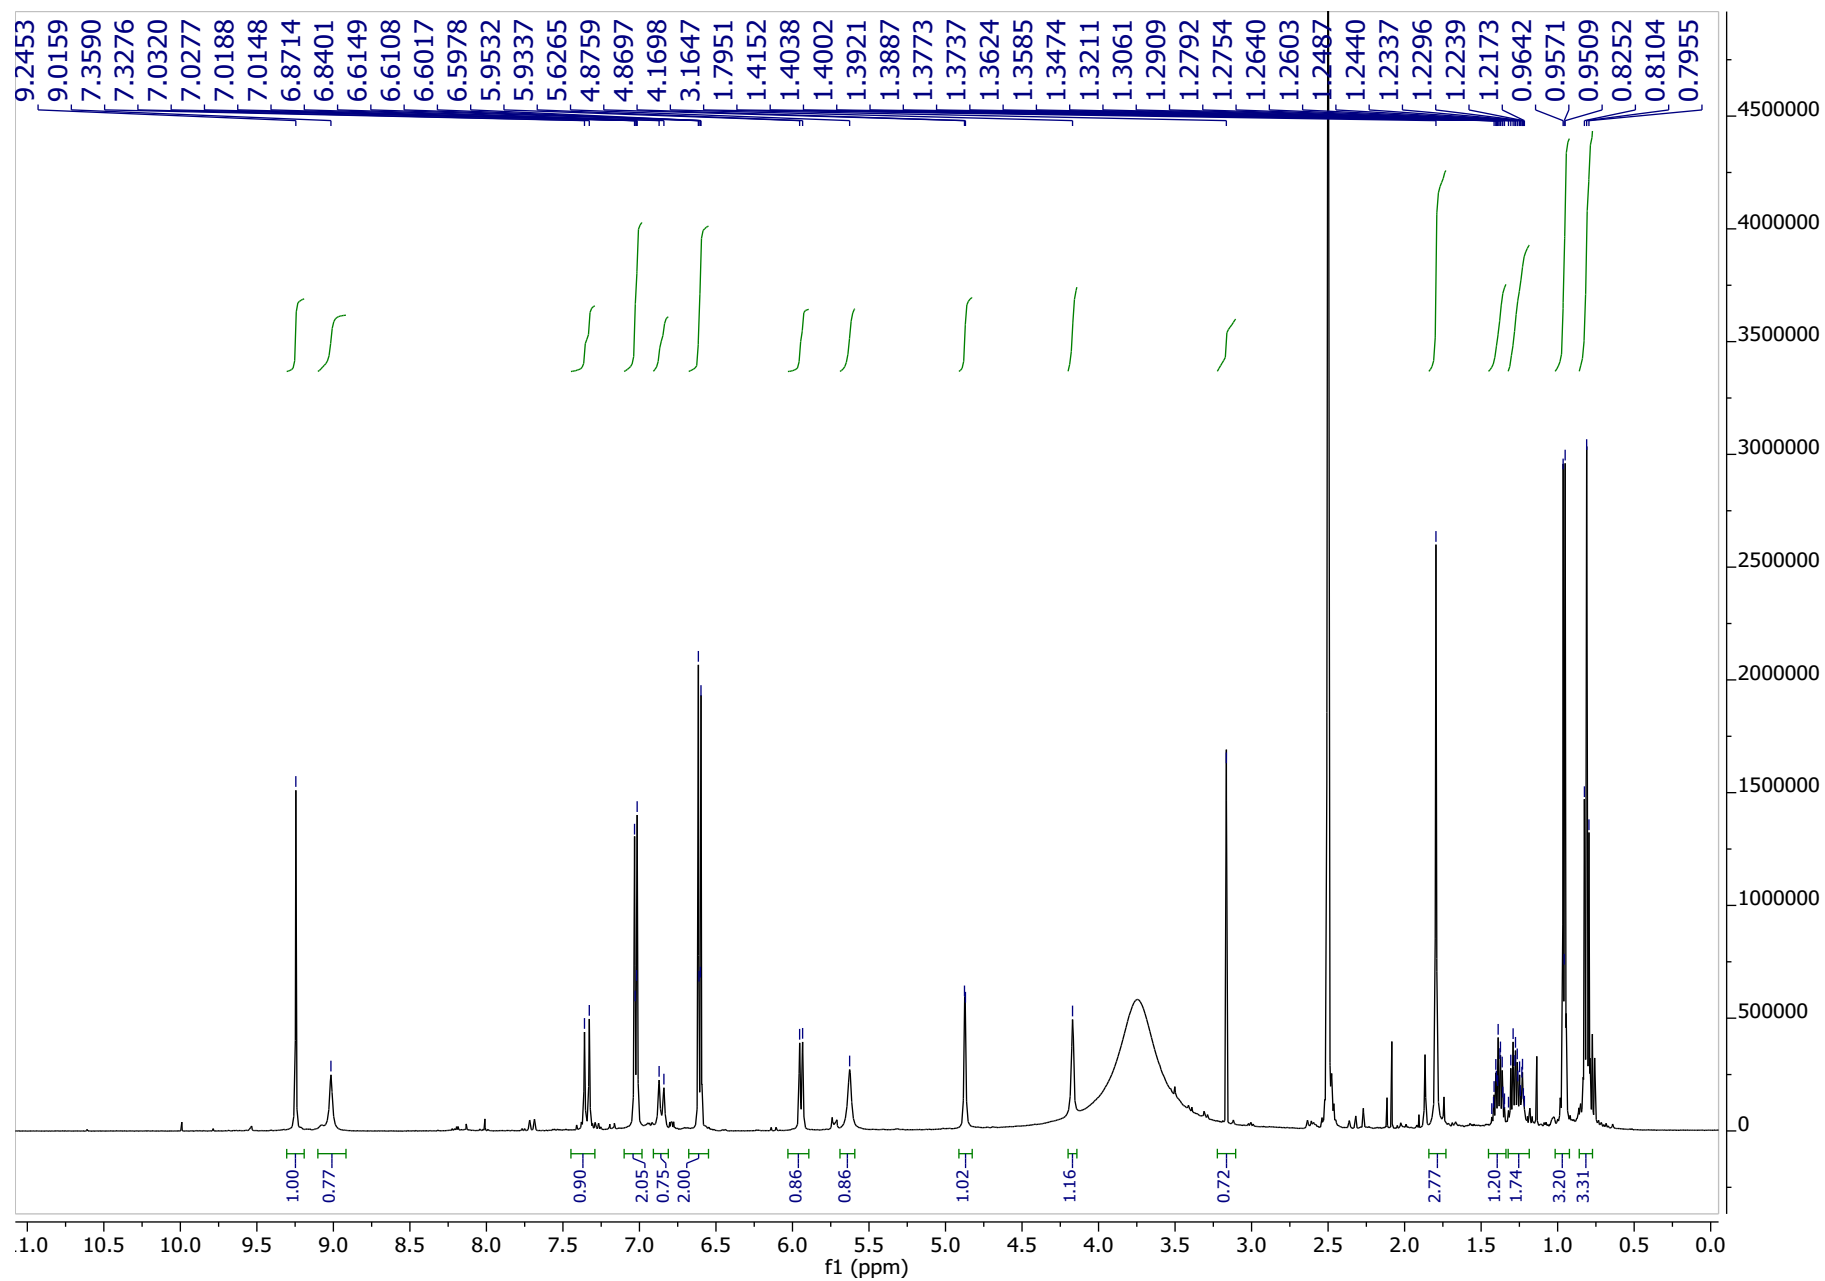

**Figure S10.**  $^1\text{H}$  NMR spectrum of **2** in  $\text{DMSO-}d_6$  at 500 MHz.

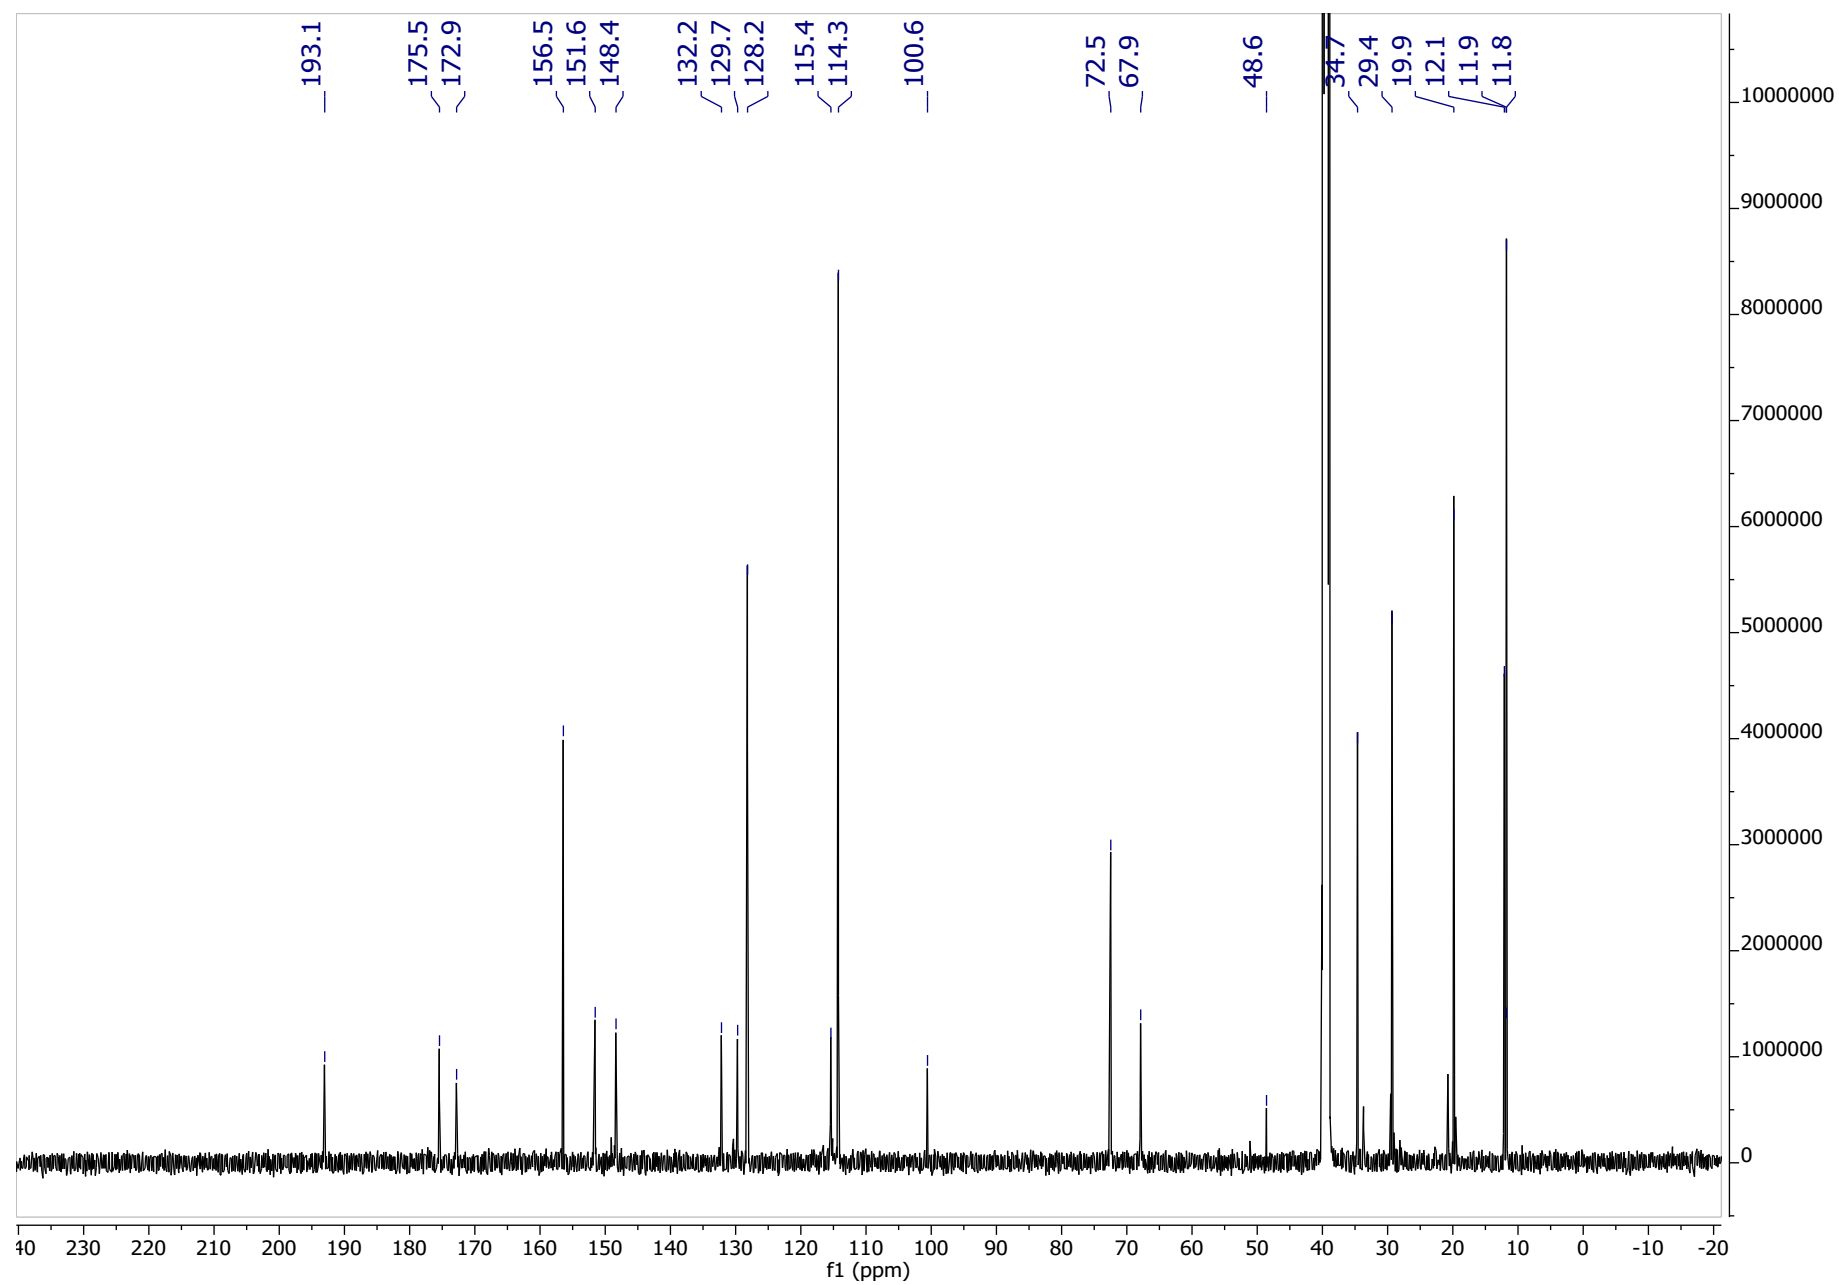

**Figure S11.** <sup>1</sup>H NMR spectrum of **2** in DMSO-*d*<sub>6</sub> at 125 MHz.

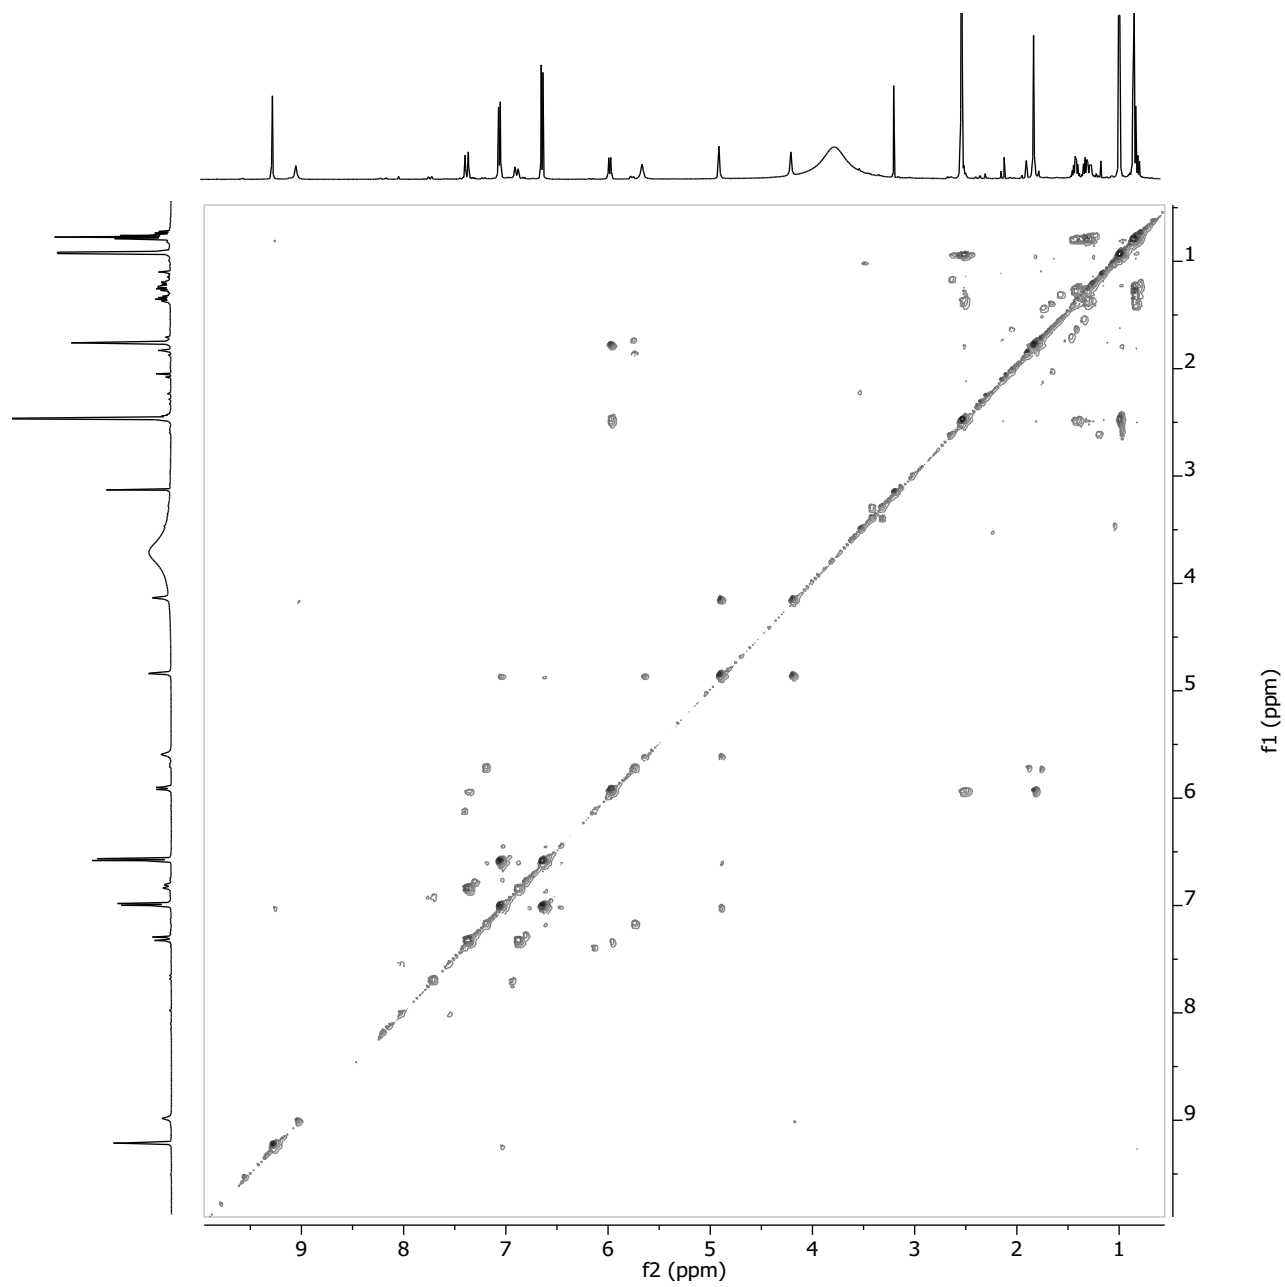

**Figure S12.**  $^1\text{H}$ - $^1\text{H}$  COSY spectrum of **2** in  $\text{DMSO-}d_6$  at 500 MHz.

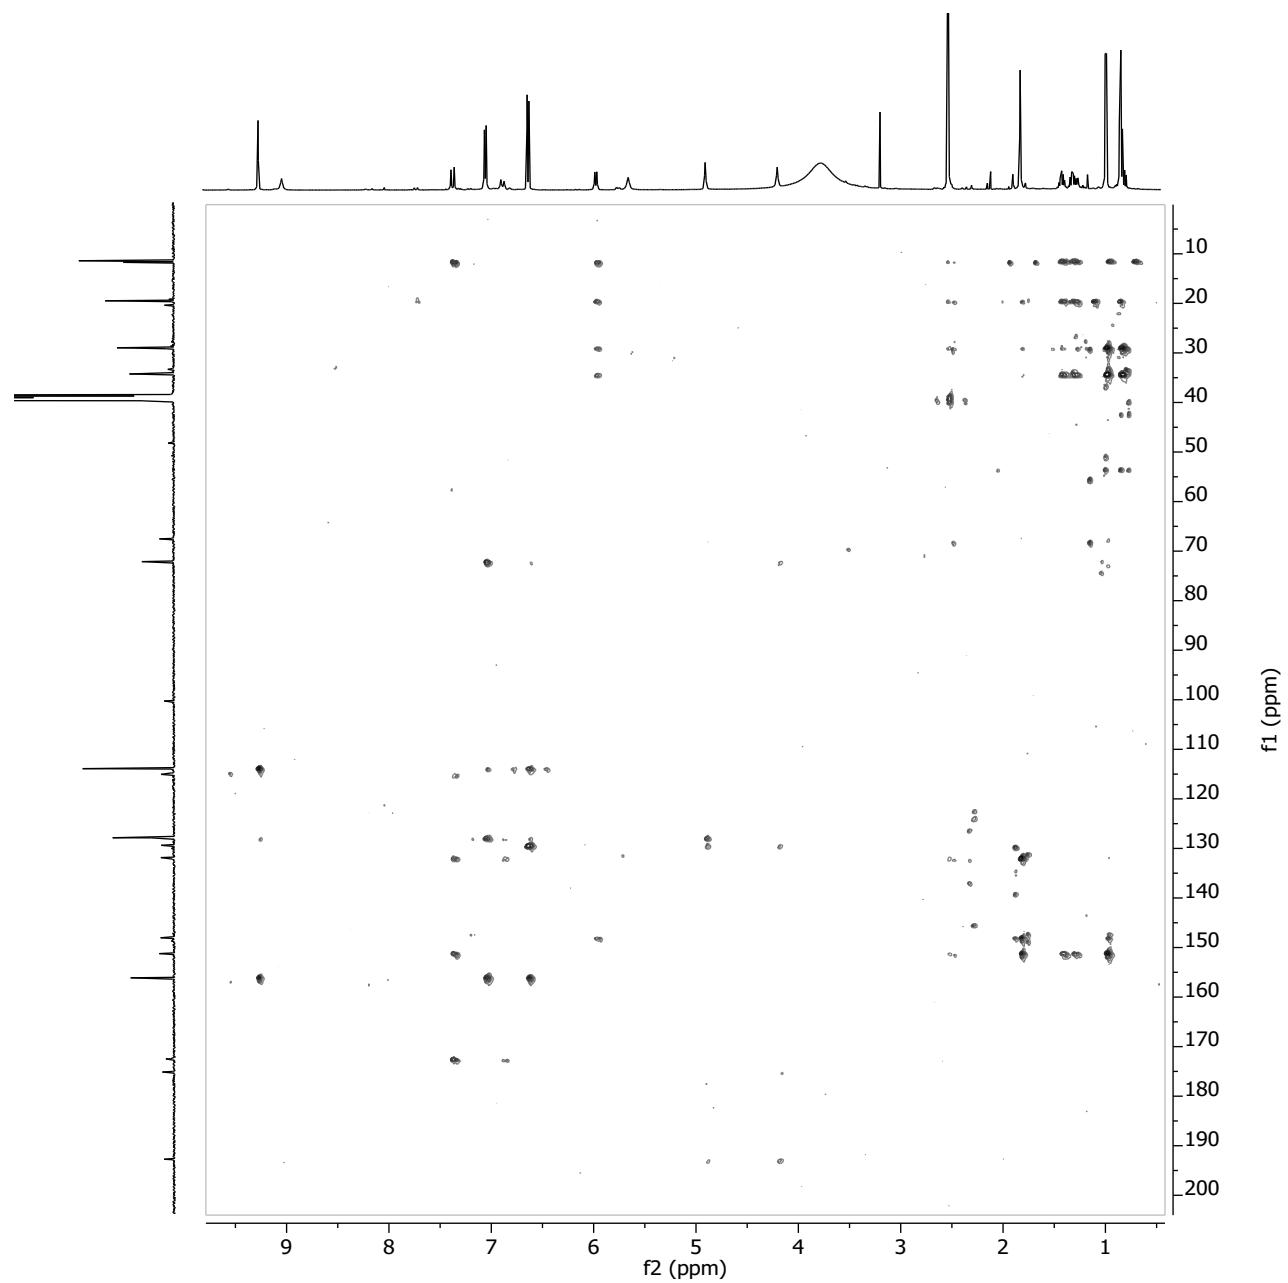

**Figure S13.** HMBC spectrum of **2** in DMSO-*d*<sub>6</sub> at 500 MHz.

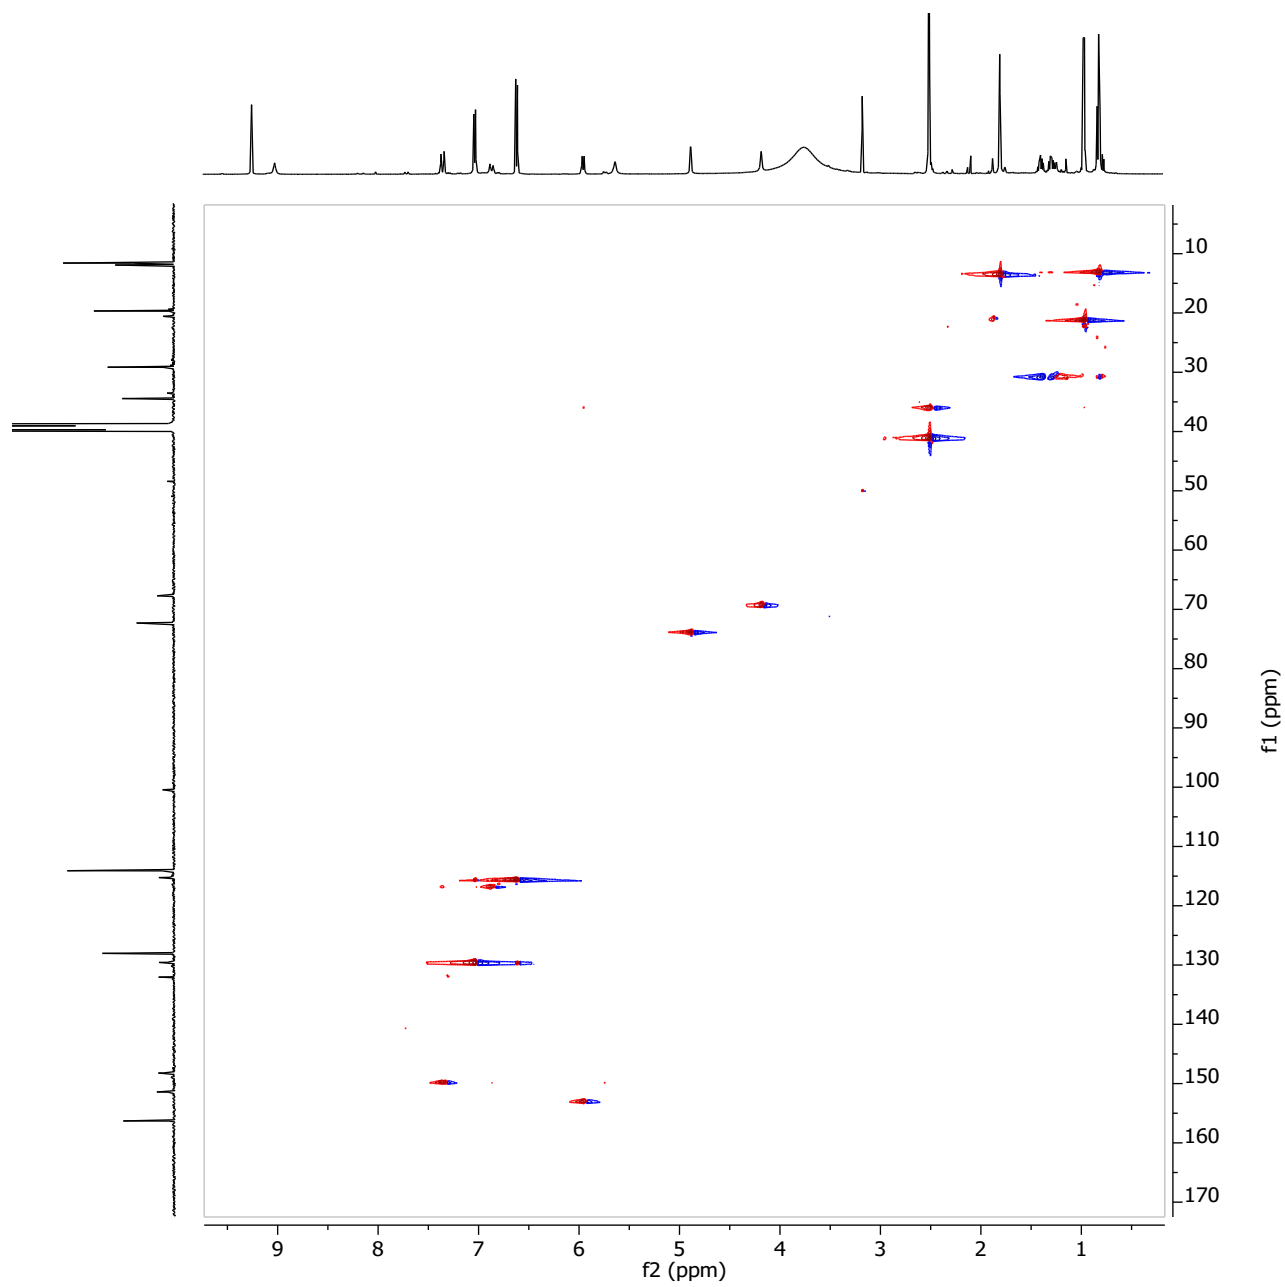

**Figure S14.** HSQC spectrum of **2** in DMSO-*d*<sub>6</sub> at 500 MHz.

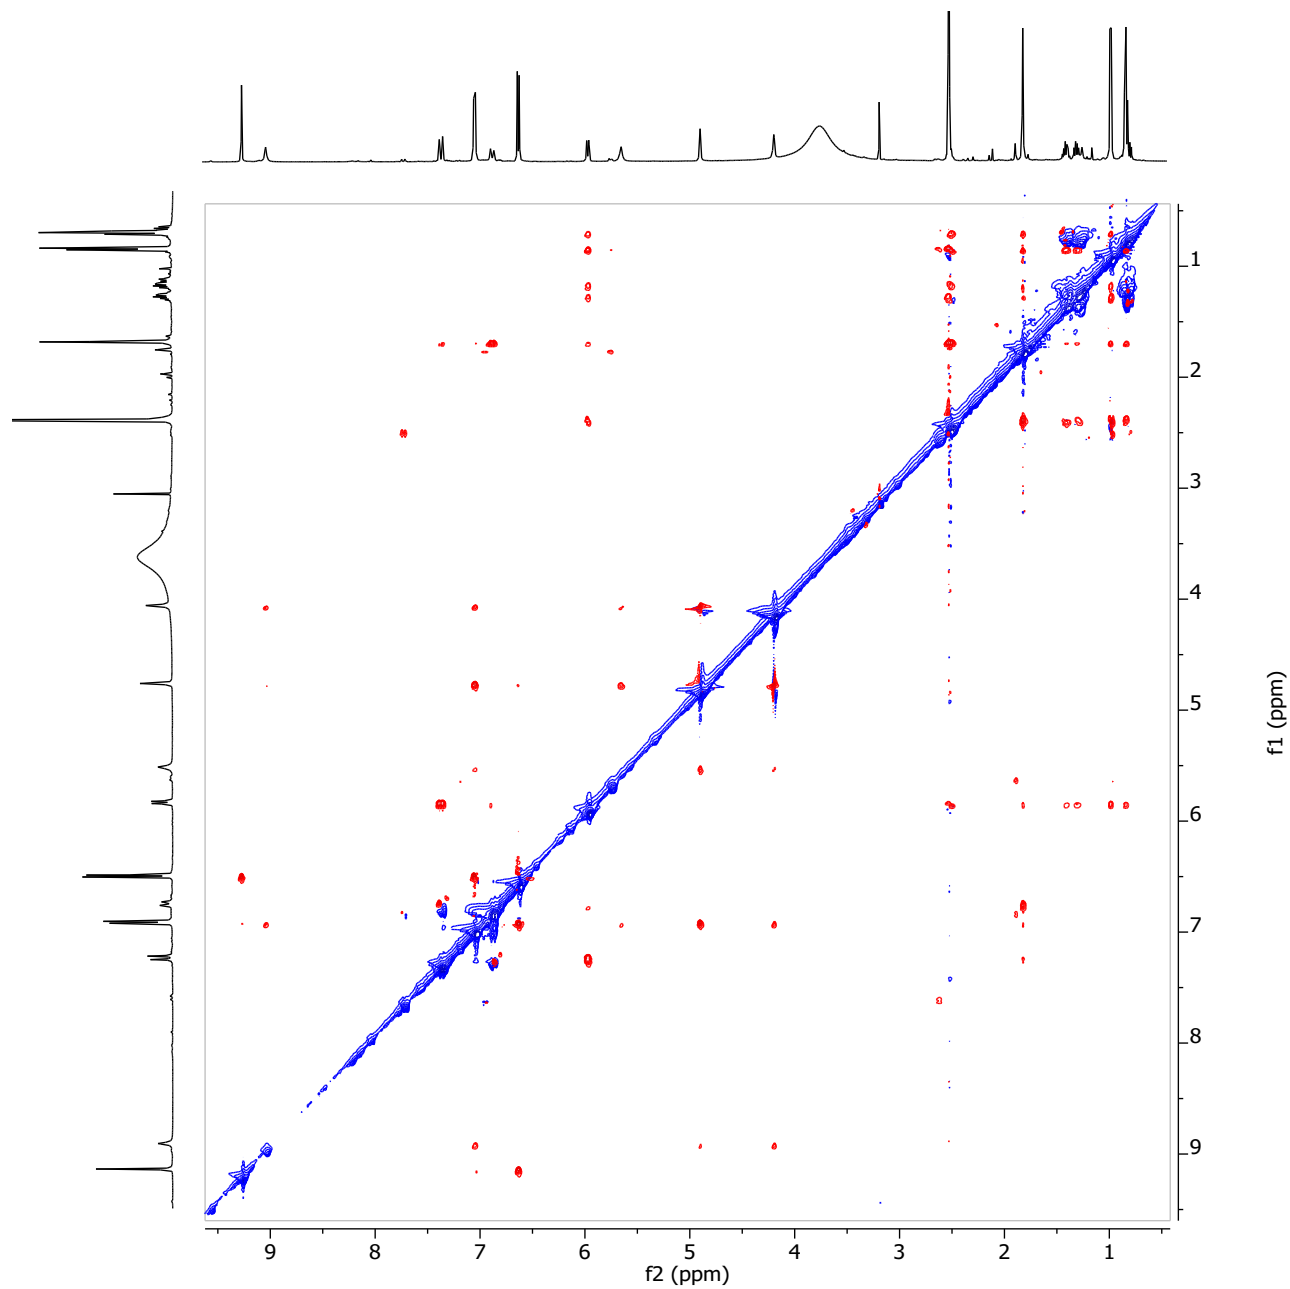

**Figure S15.** ROESY spectrum of **2** in DMSO-*d*<sub>6</sub> at 700 MHz.

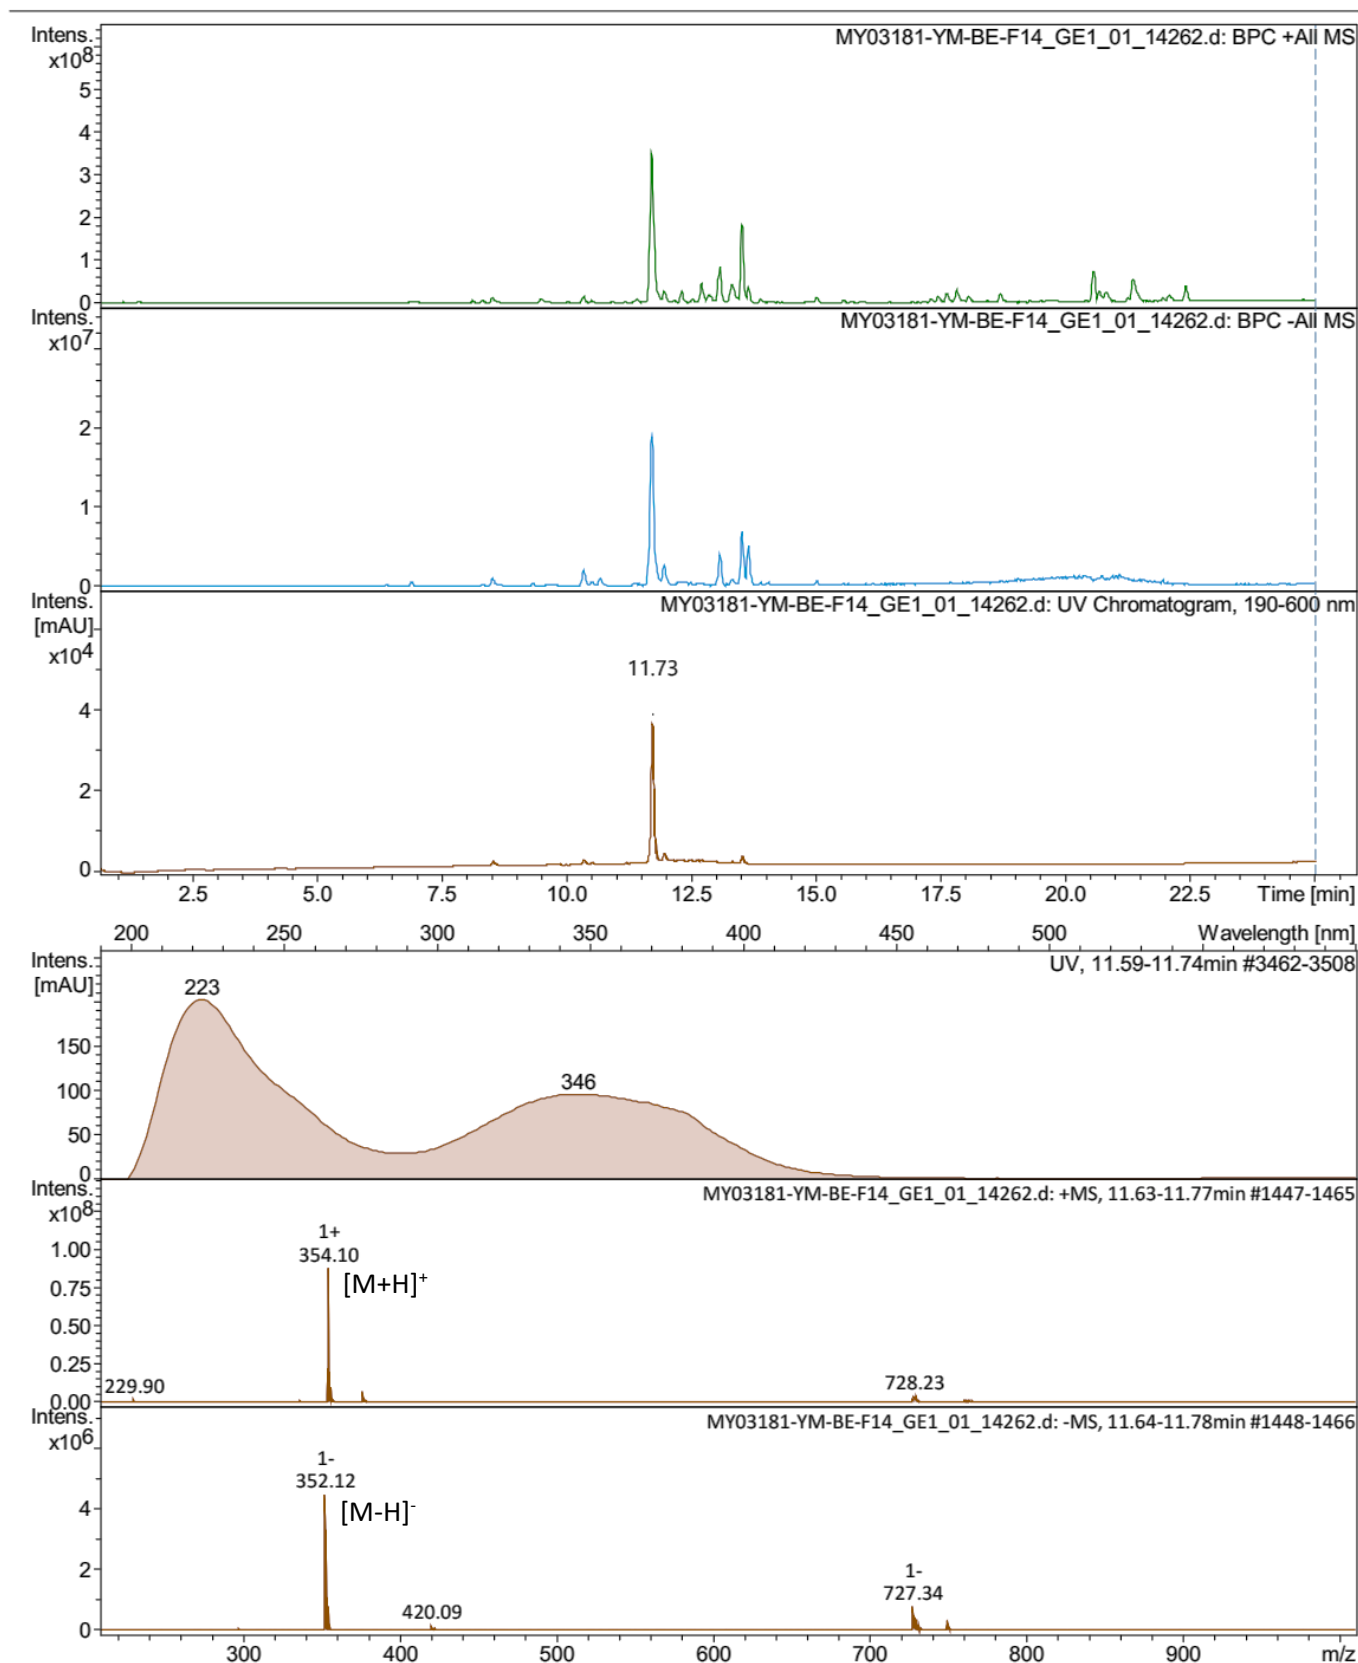

**Figure S16.** LRESIMS of **3**.



## Generic Display Report

### Analysis Info

Analysis Name S:\DATA\maXis\lto20\_Rita Toshe\23\_05\23\_05\_27\MY03181-YM-BE-F14\_93\_01\_11716.d  
Method pos\_säure\_10000\_screening\_ms\_100\_2500\_line.m  
Sample Name MY03181-YM-BE-F14  
Comment Screening01  
Waters Acquity UPLC BEH C<sub>18</sub> 1,7µm 2.1x50mm

Acquisition Date 28.05.2023 09:01:25

Operator ate06

Instrument maXis

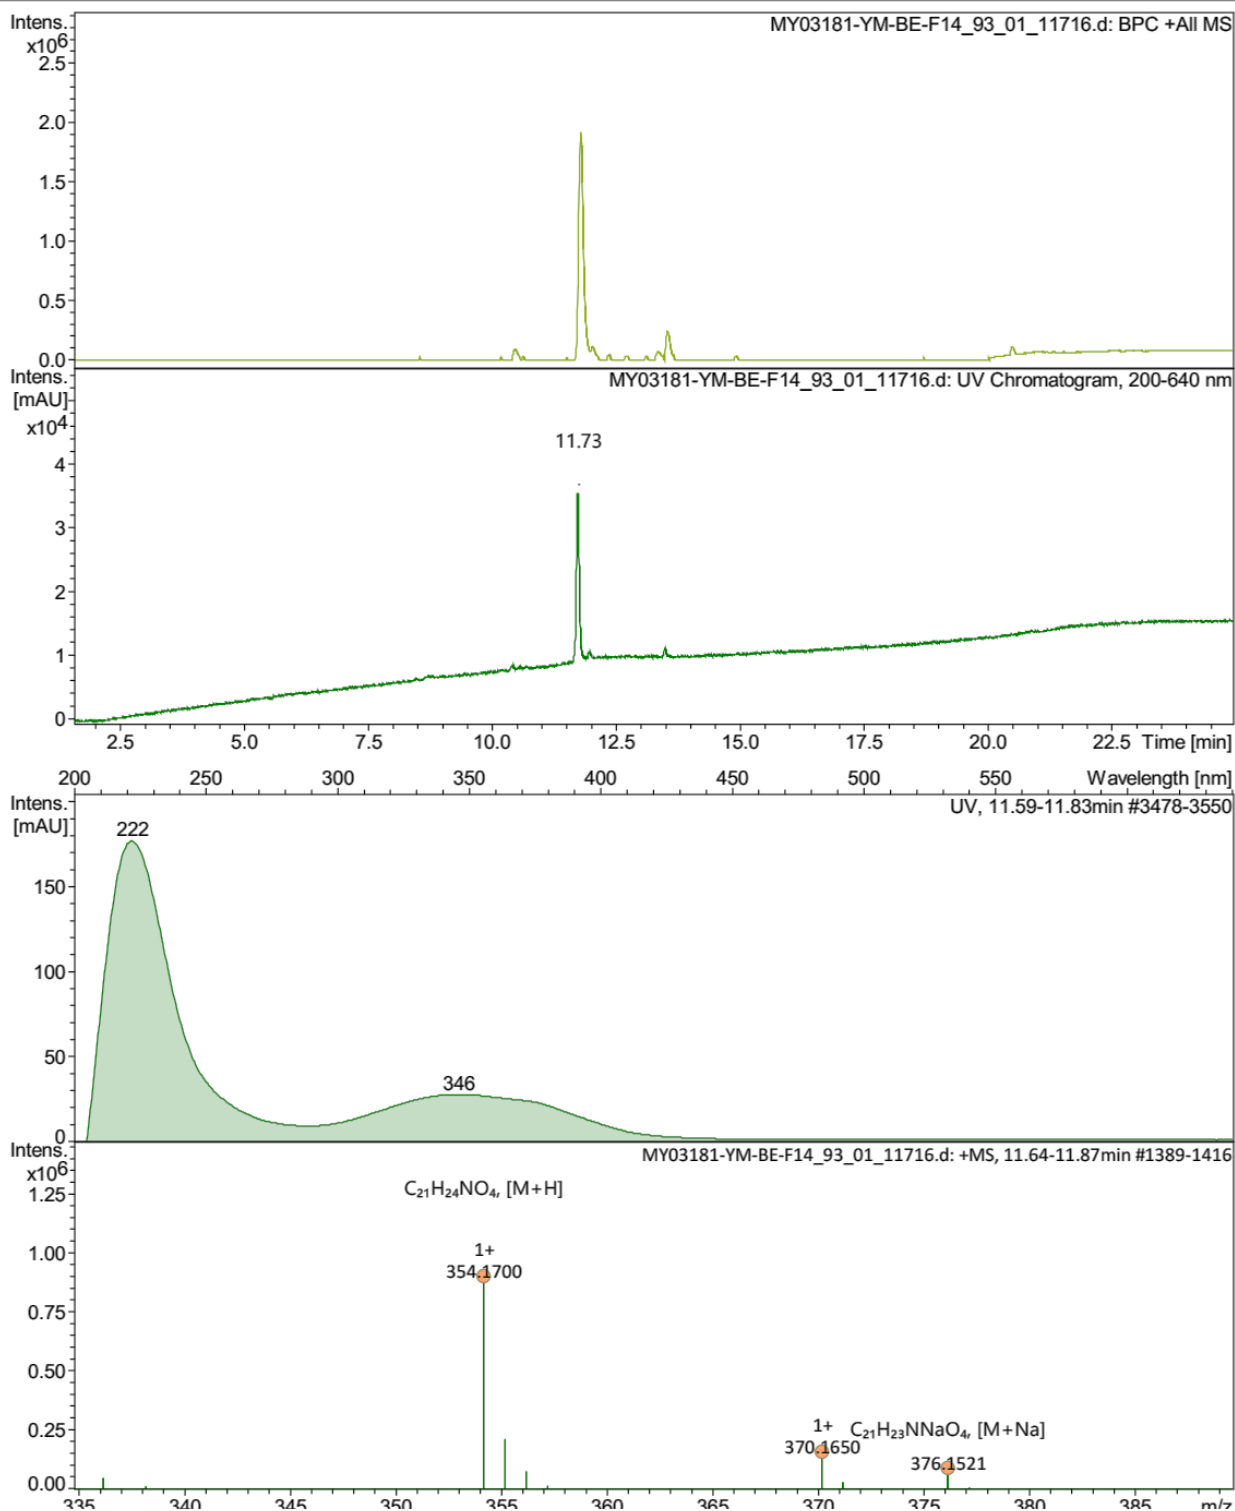

Figure S17. HRESIMS of 3.

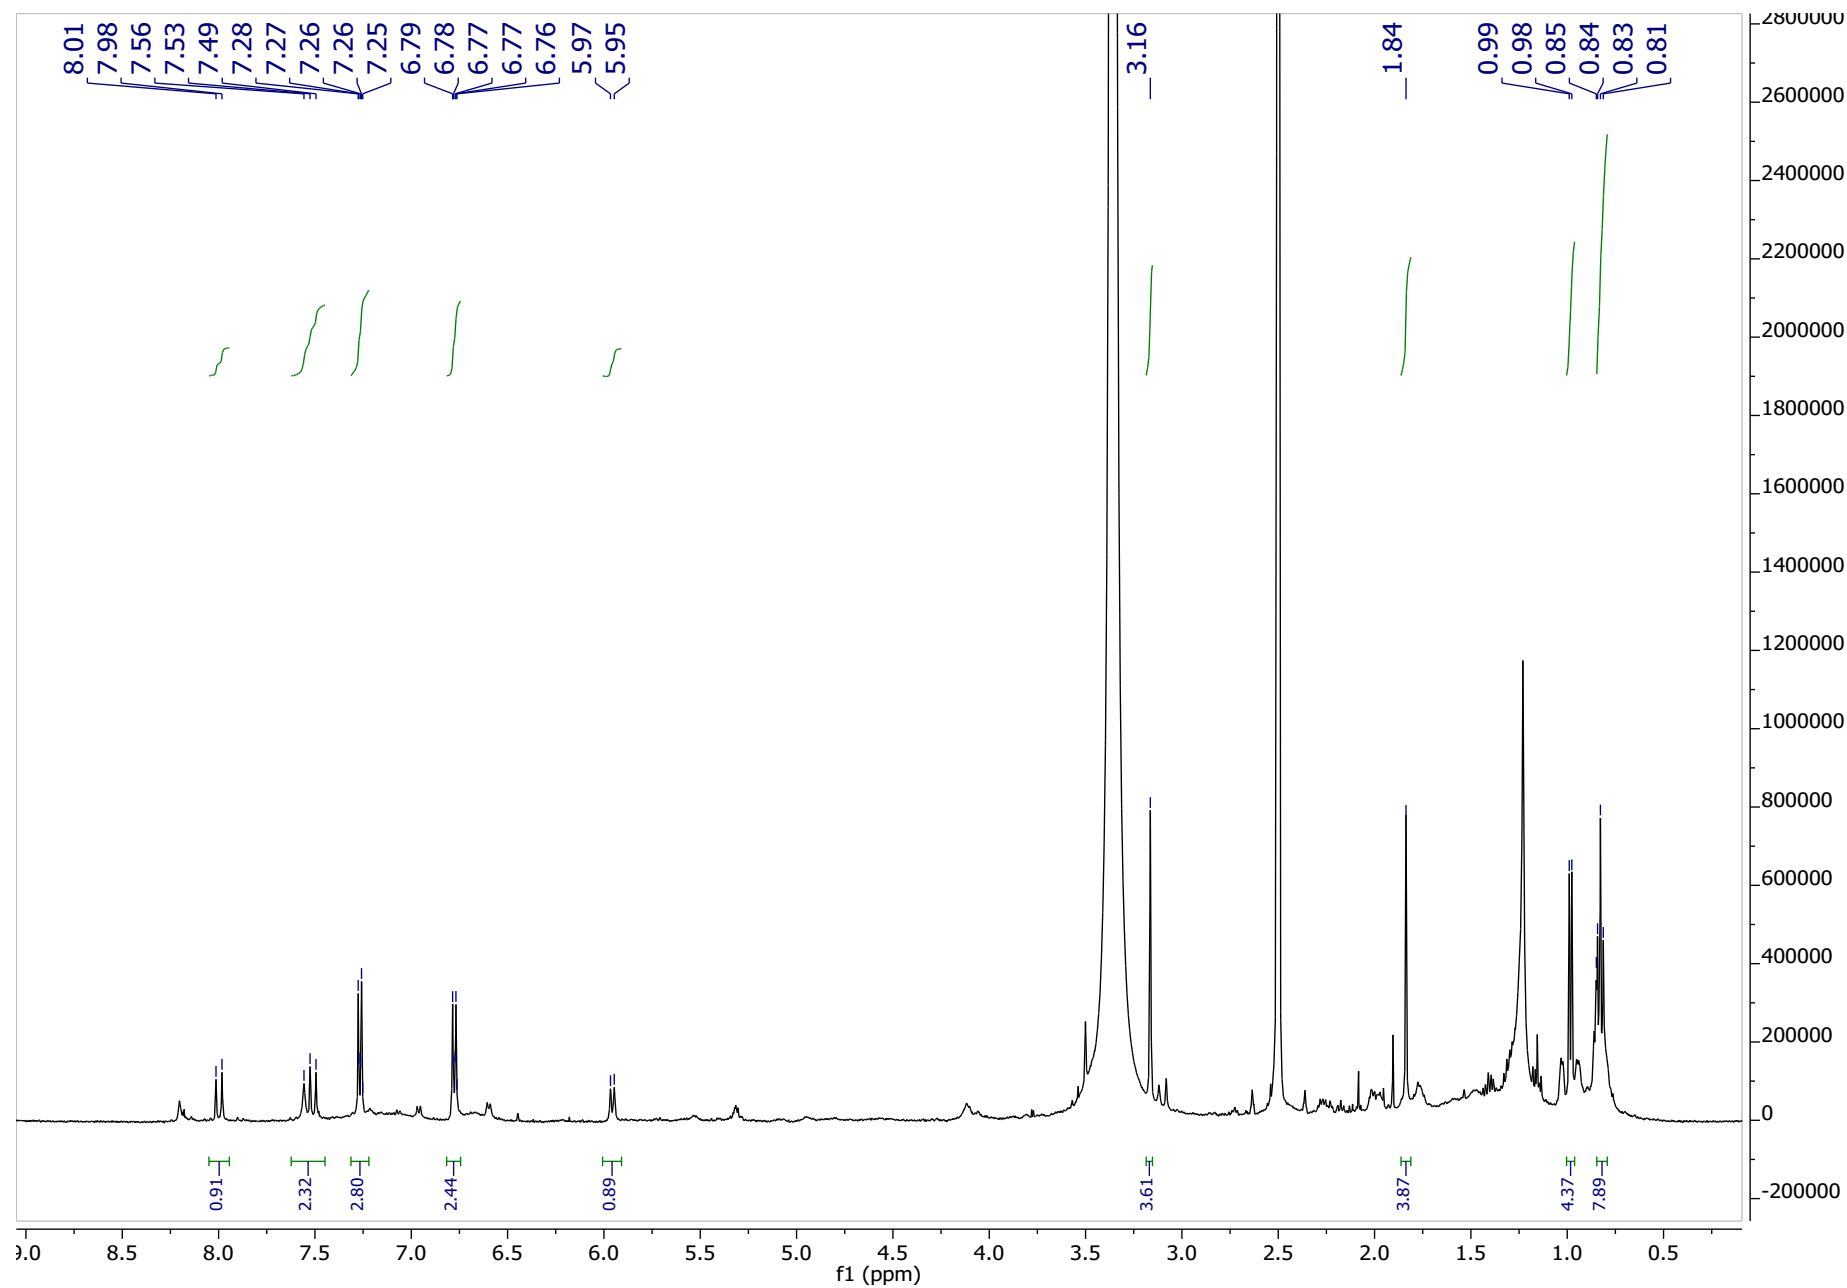

**Figure S18.**  $^1\text{H}$  NMR spectrum of **3** in  $\text{DMSO-}d_6$  at 500 MHz.

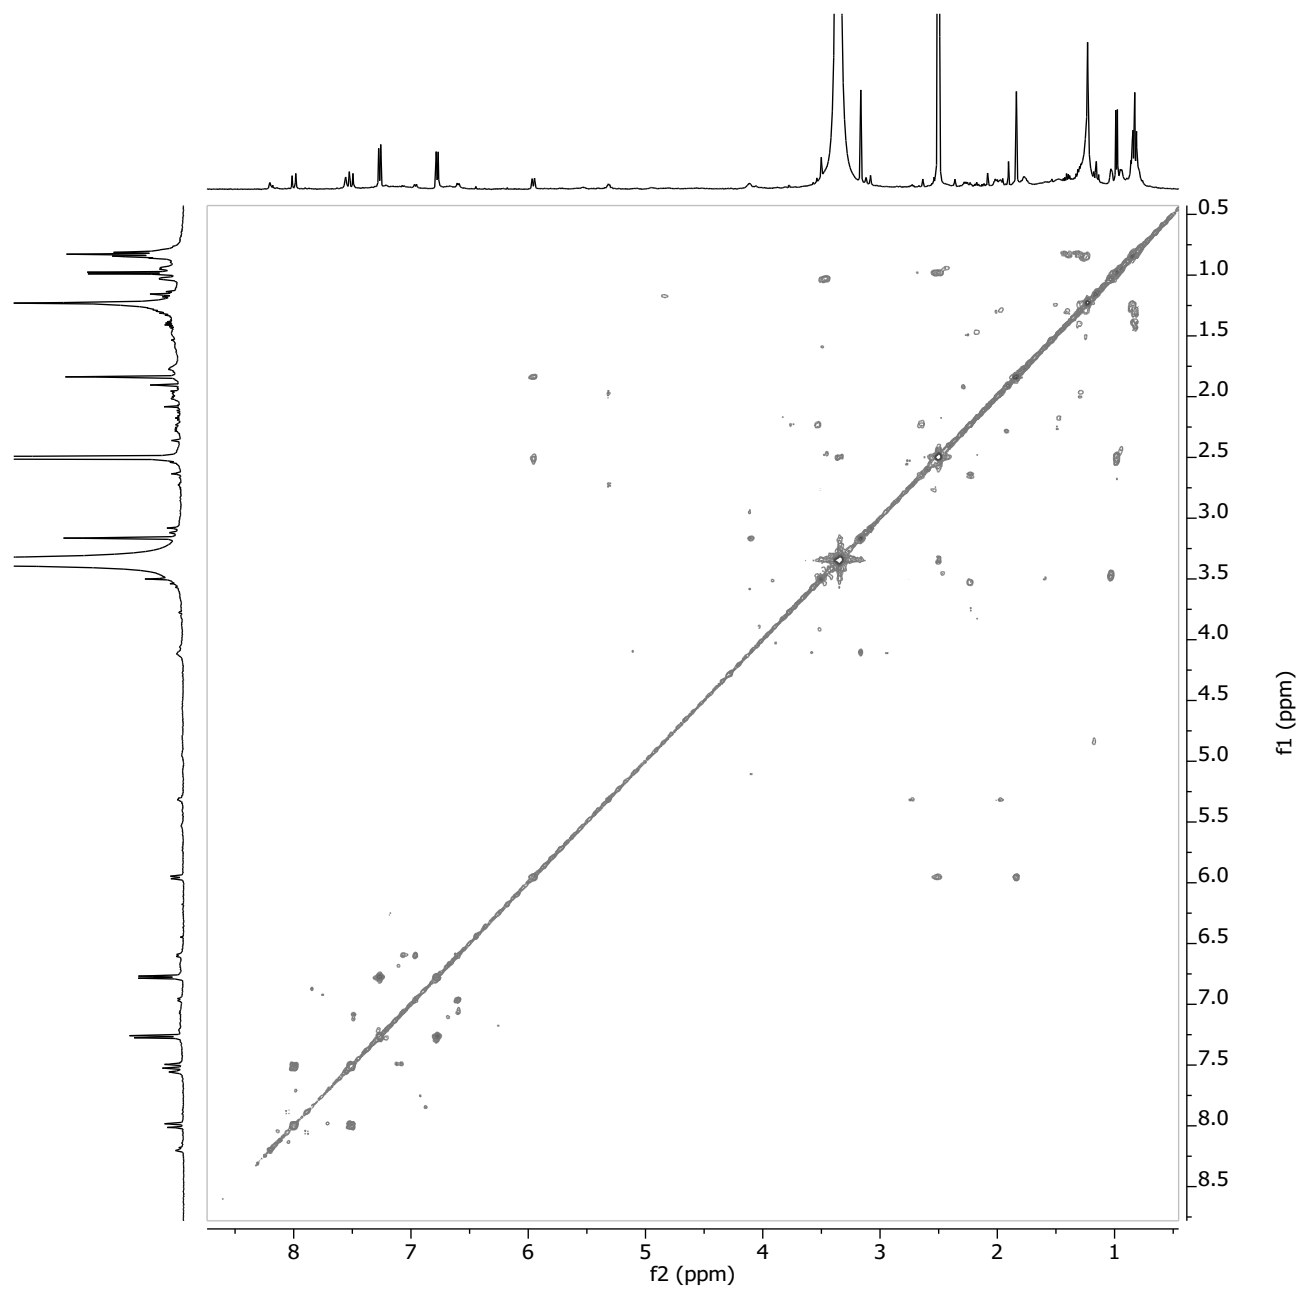

**Figure S19.**  $^1\text{H}$ - $^1\text{H}$  COSY spectrum of **3** in  $\text{DMSO}-d_6$  at 500 MHz.

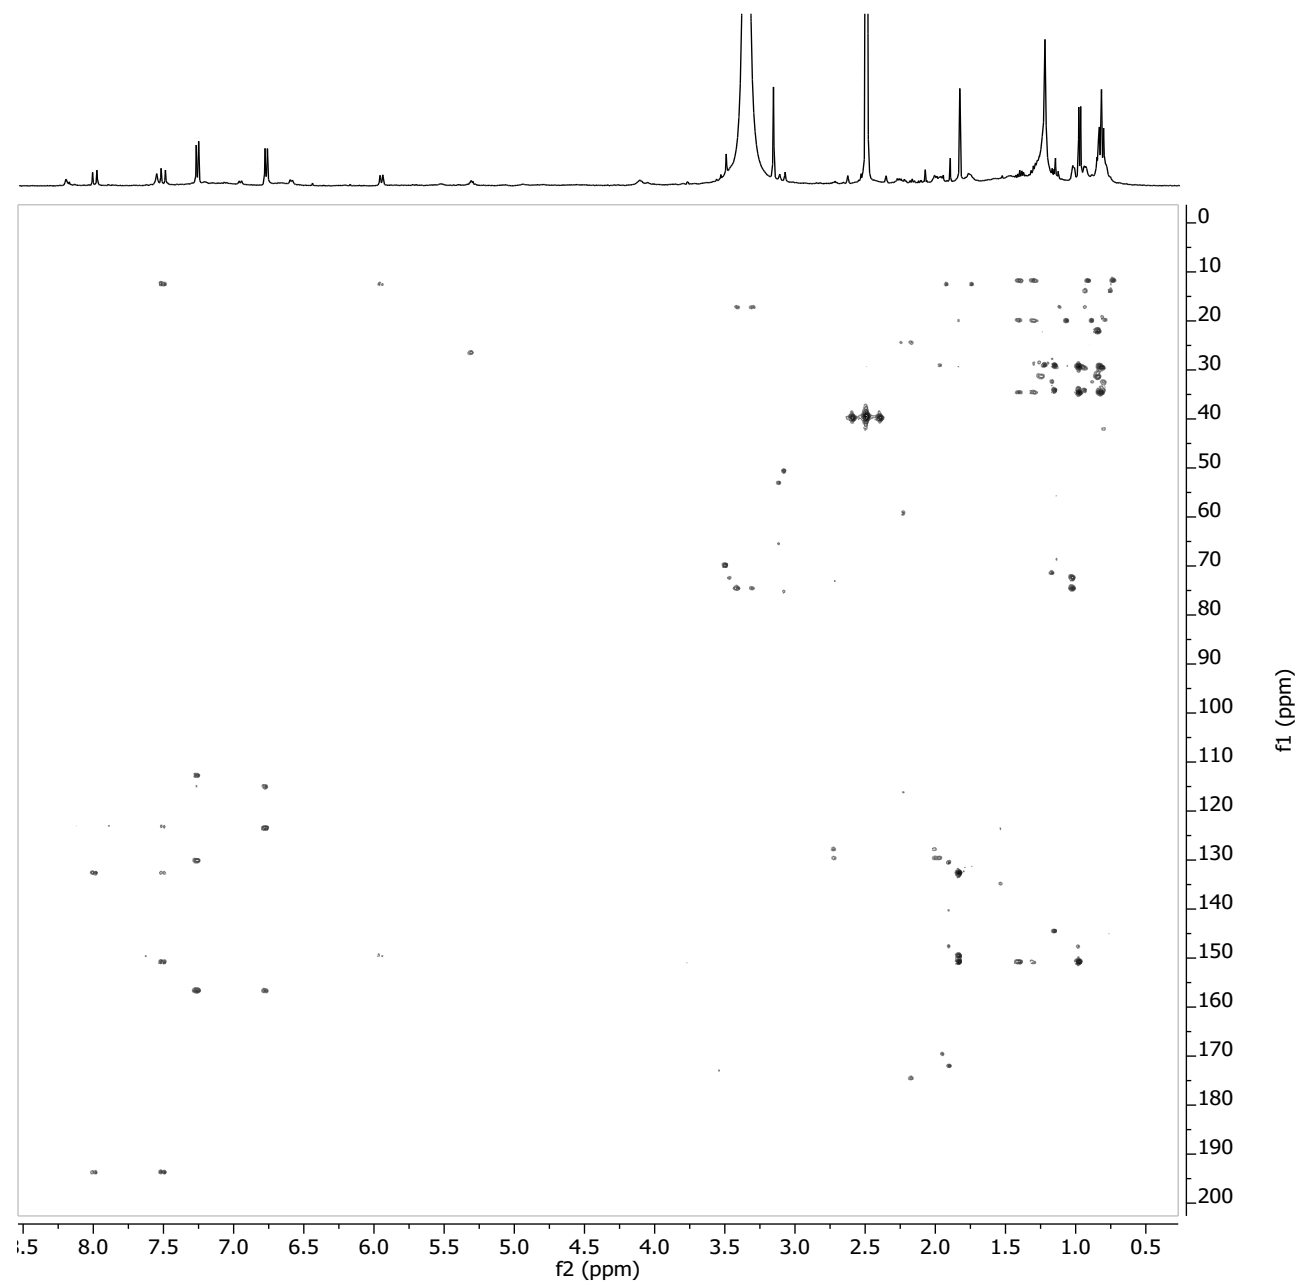

**Figure S20.** HMBC spectrum of **3** in DMSO-*d*<sub>6</sub> at 500 MHz.

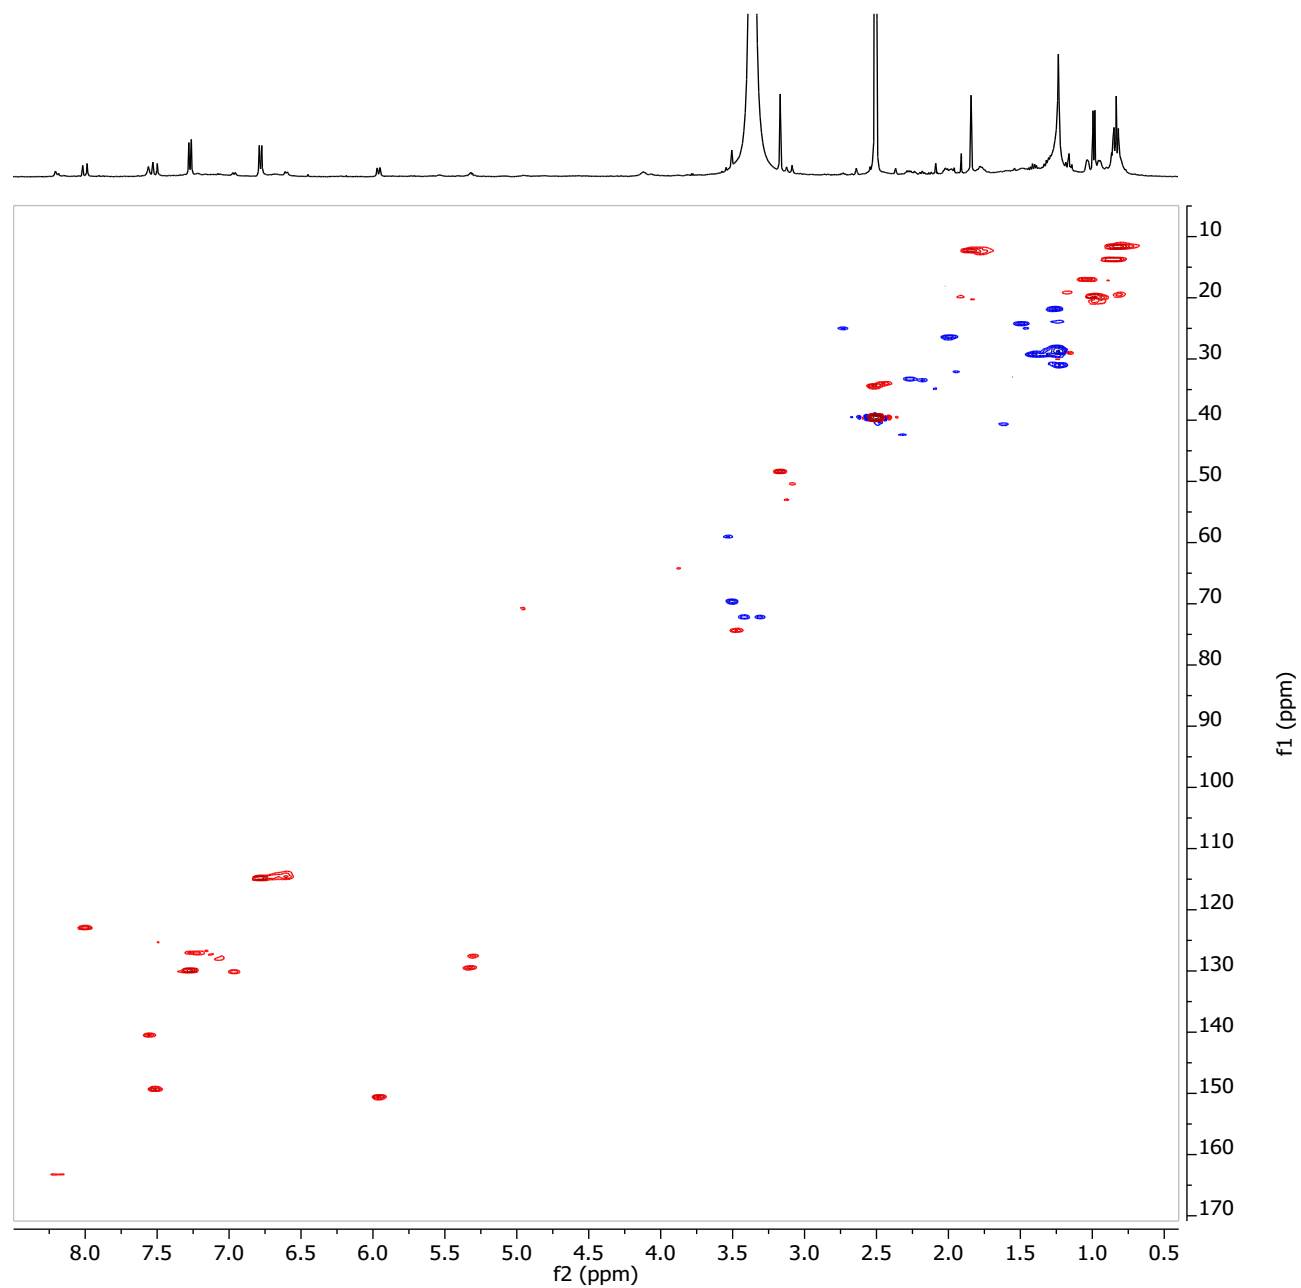

**Figure S21.** HSQC spectrum of **3** in  $\text{DMSO-}d_6$  at 500 MHz.

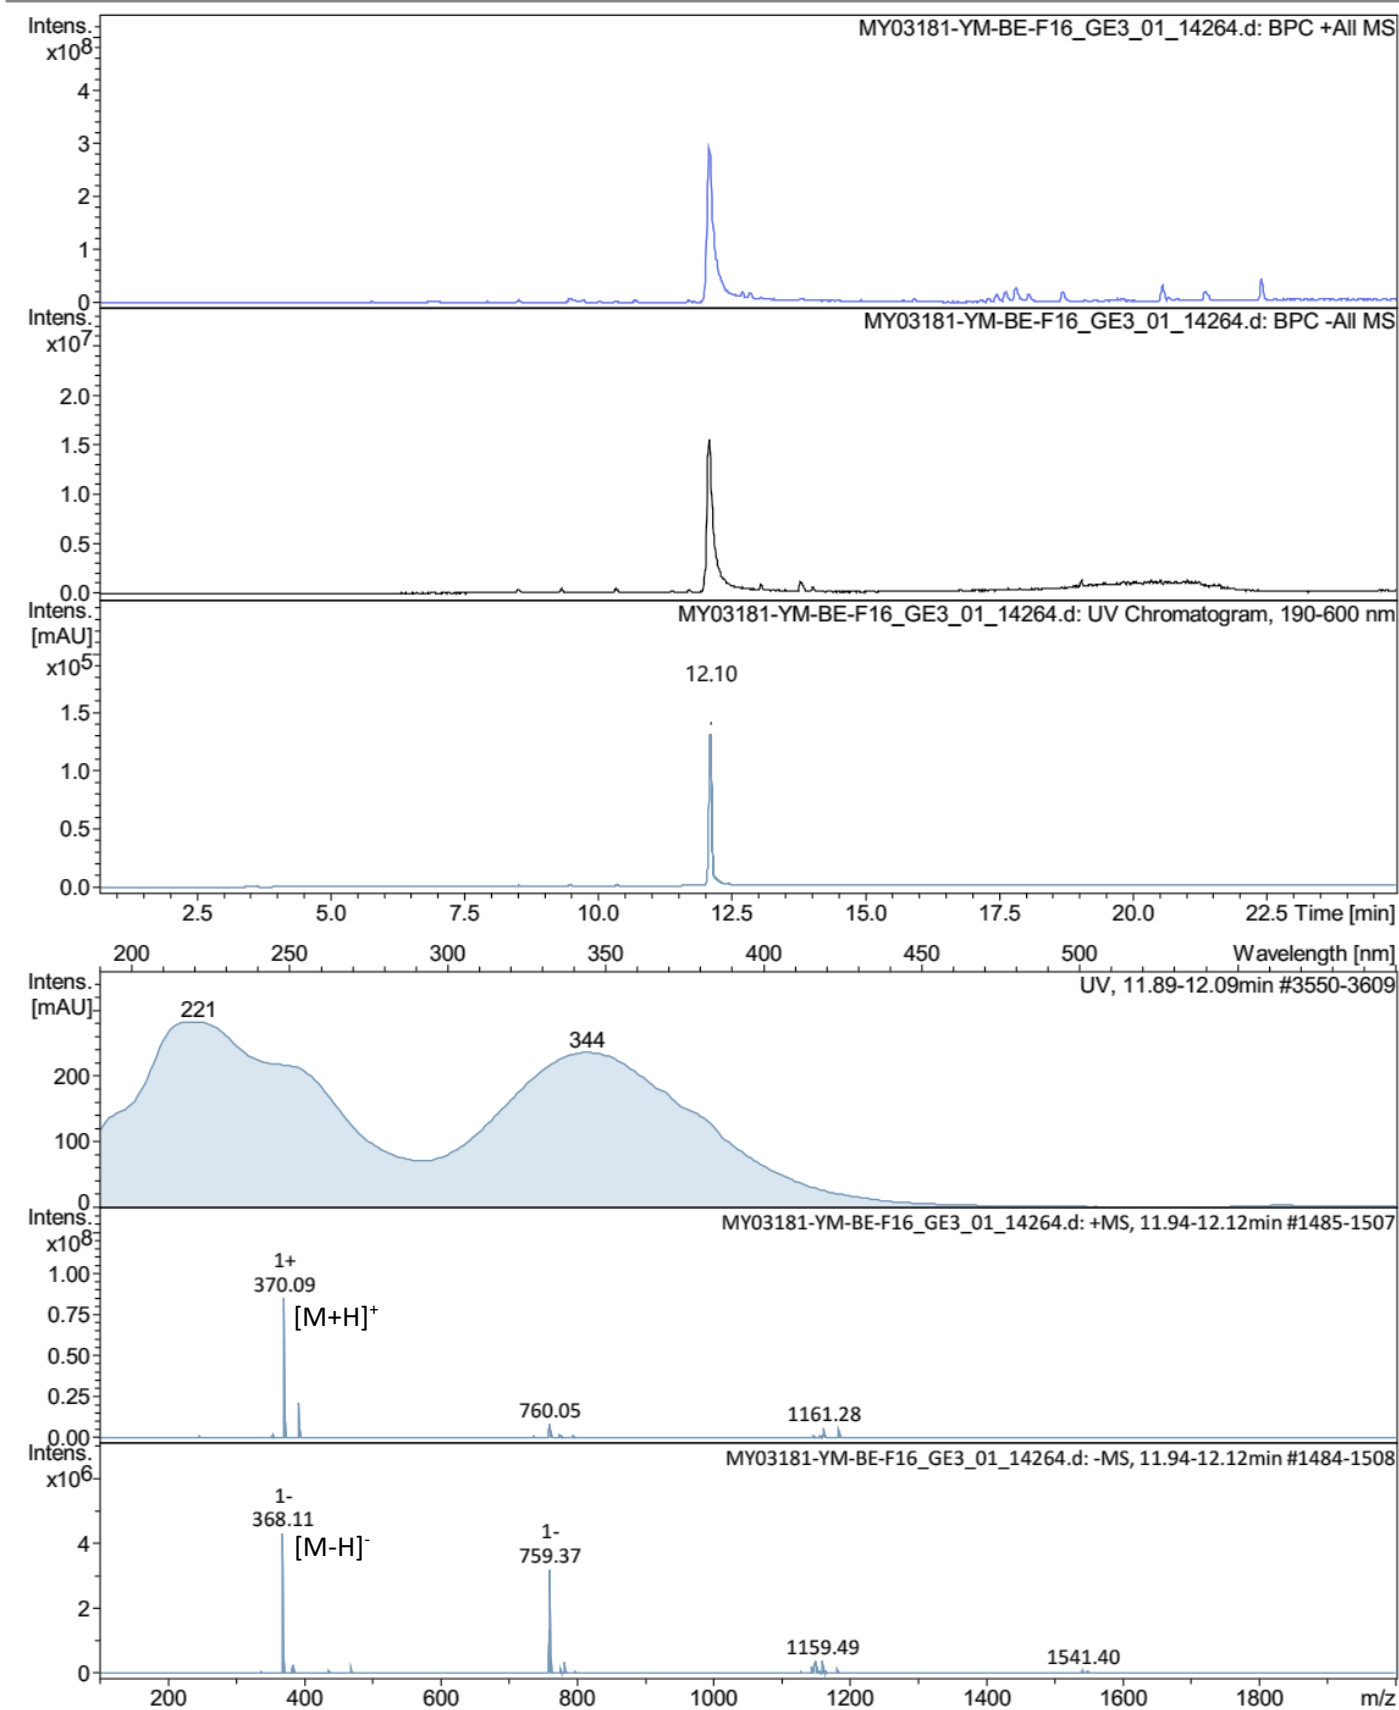

**Figure S22. LRESIMS of 4.**

## Generic Display Report

### Analysis Info

Analysis Name S:\DATA\MaXis\lto20\_Rita Toshe\23\_05\23\_05\_27\MY03181-YM-BE-F16\_95\_01\_11718.d  
Method pos\_säure\_10000\_screening\_ms\_100\_2500\_line.m  
Sample Name MY03181-YM-BE-F16  
Comment Screening01  
Waters Acquity UPLC BEH C<sub>18</sub> 1,7µm 2.1x50mm

Acquisition Date 28.05.2023 10:03:17

Operator ate06  
Instrument maXis

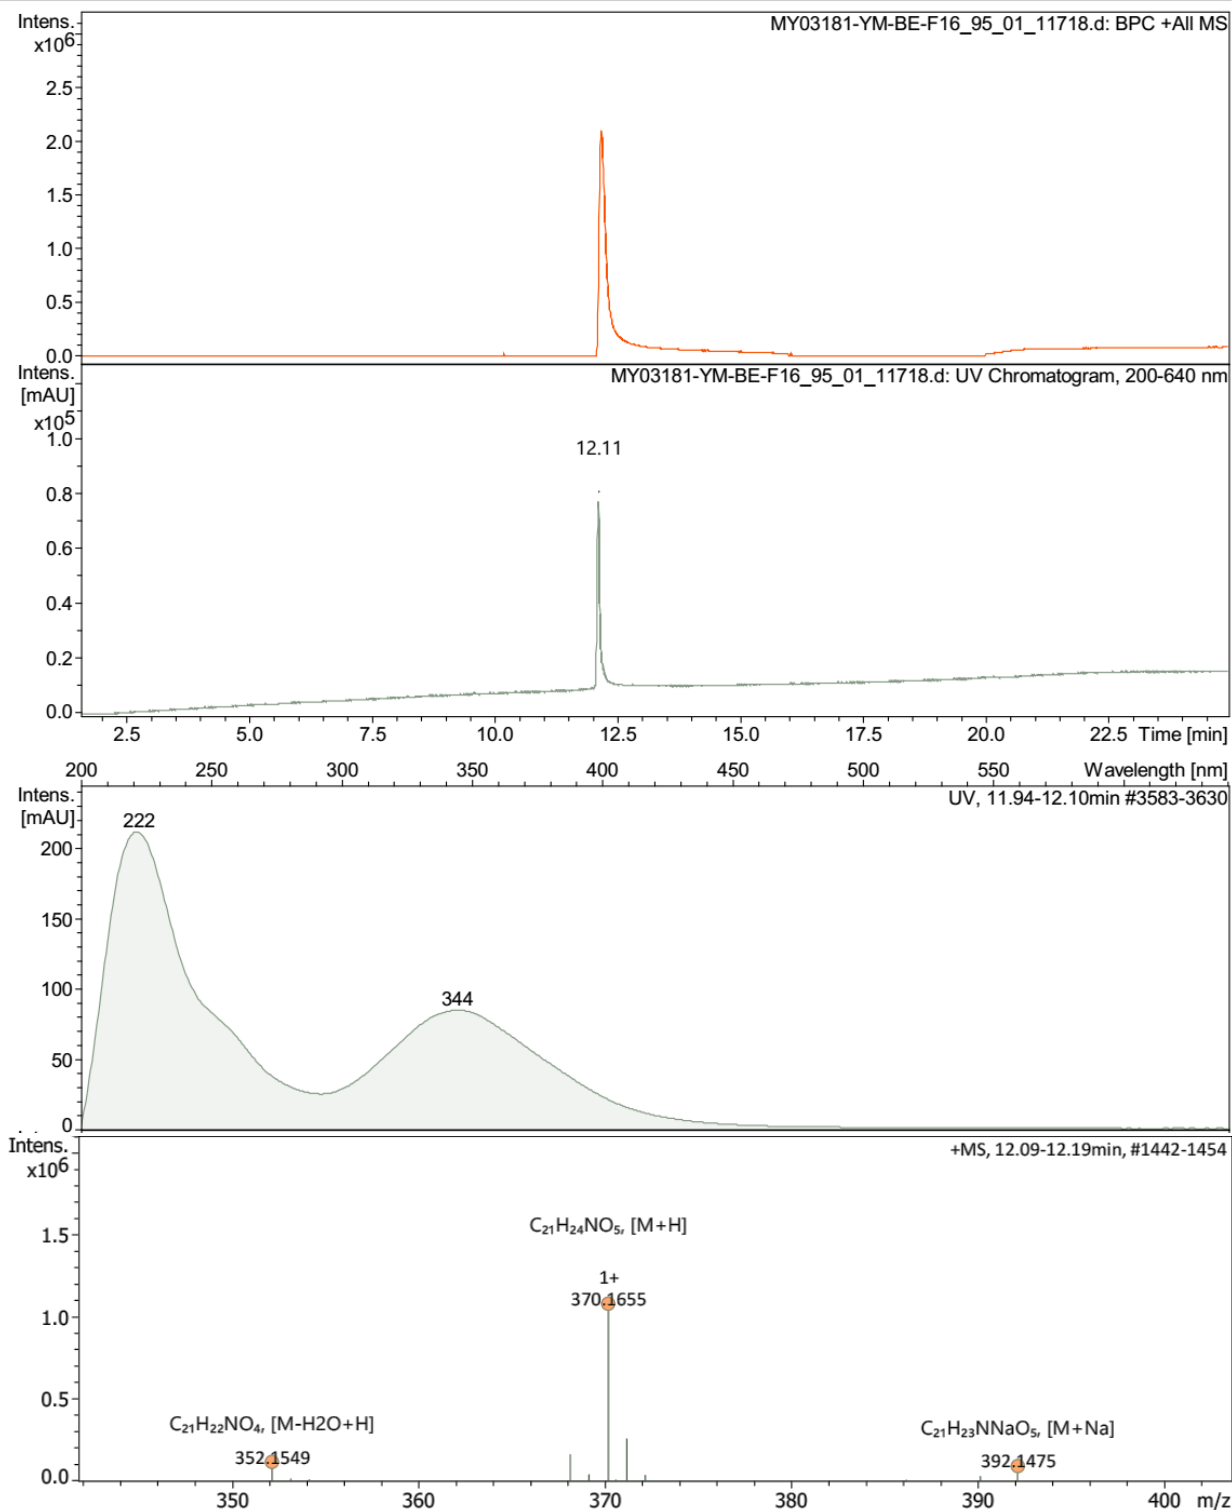

Figure S23. HRESIMS of 4.

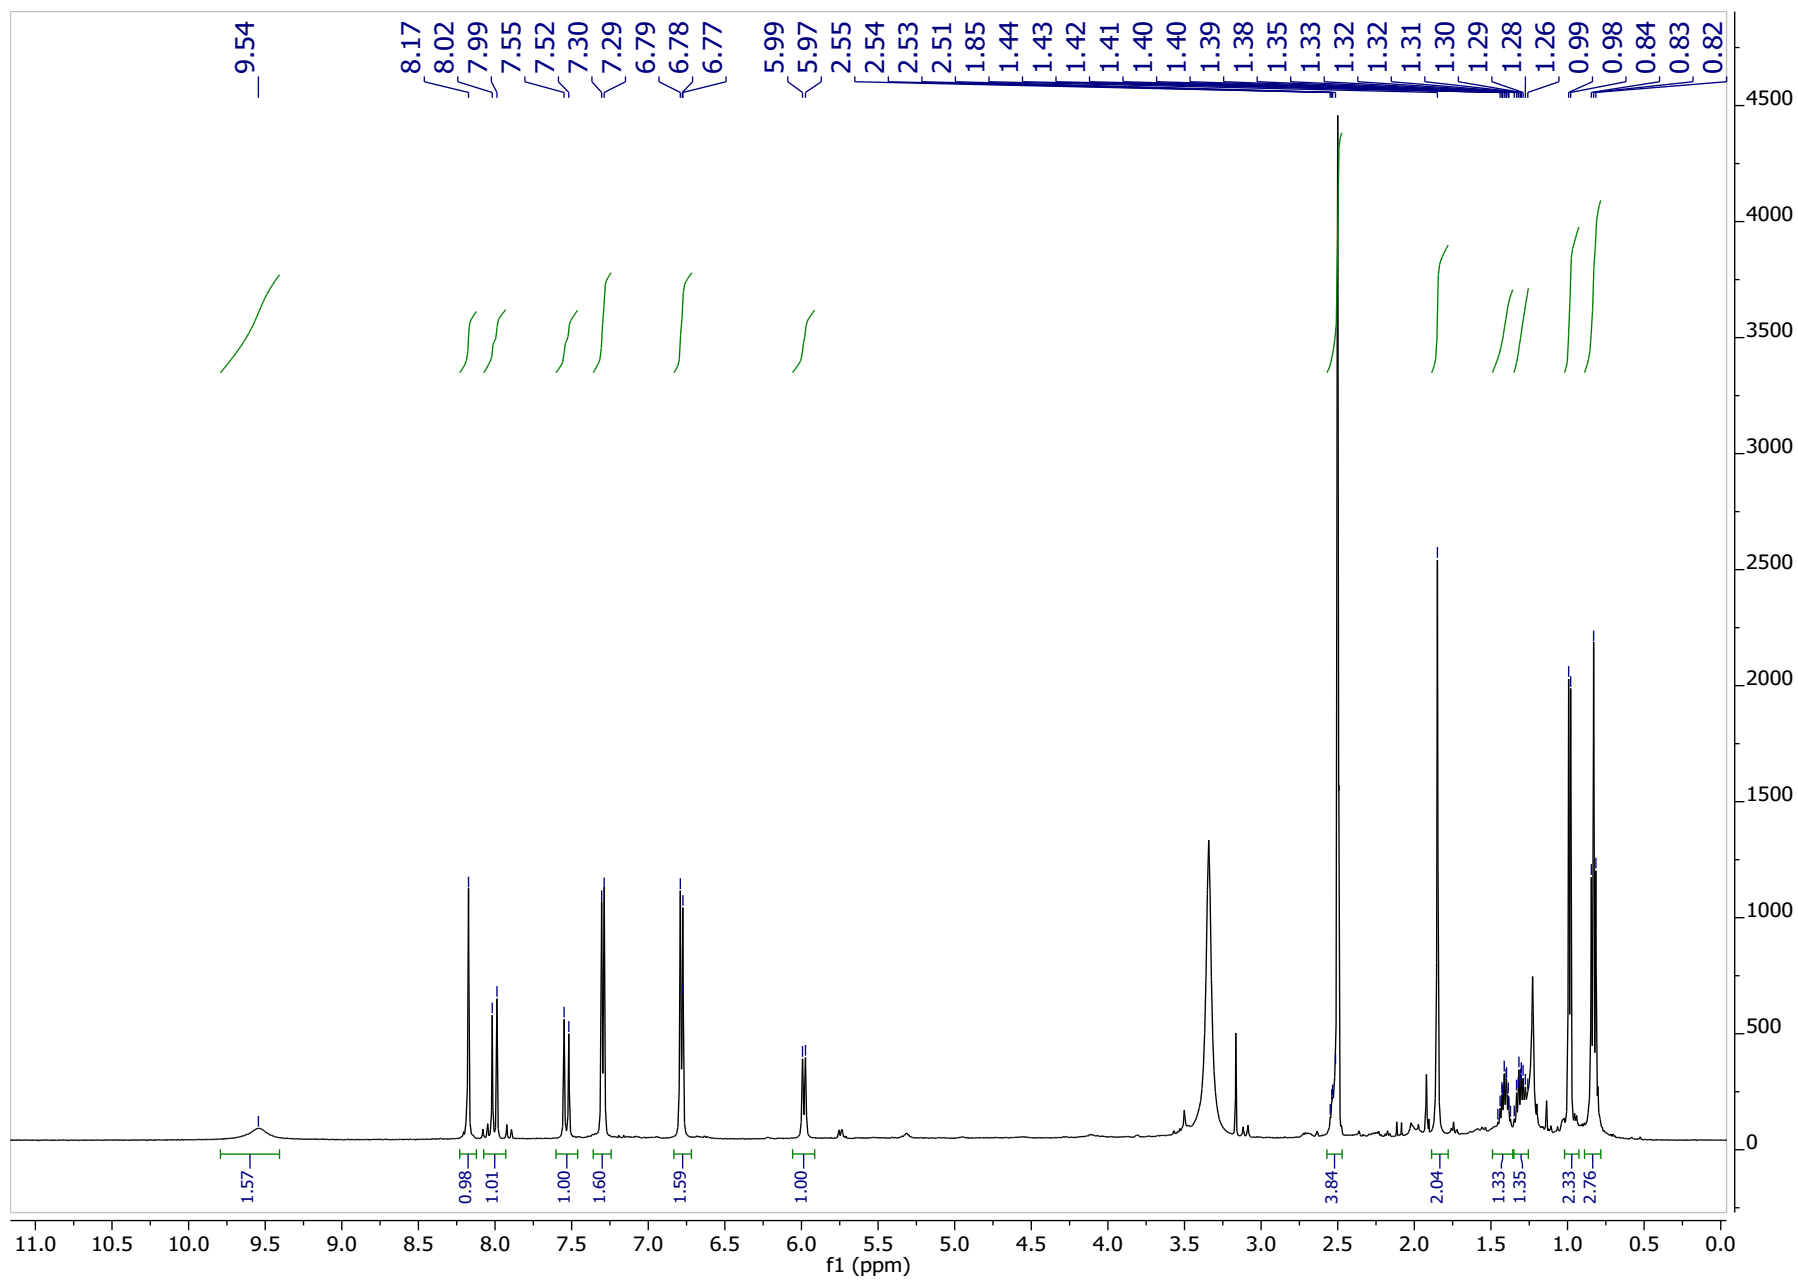

**Figure S24.**  $^1\text{H}$  NMR spectrum of **4** in  $\text{DMSO}-d_6$  at 500 MHz.



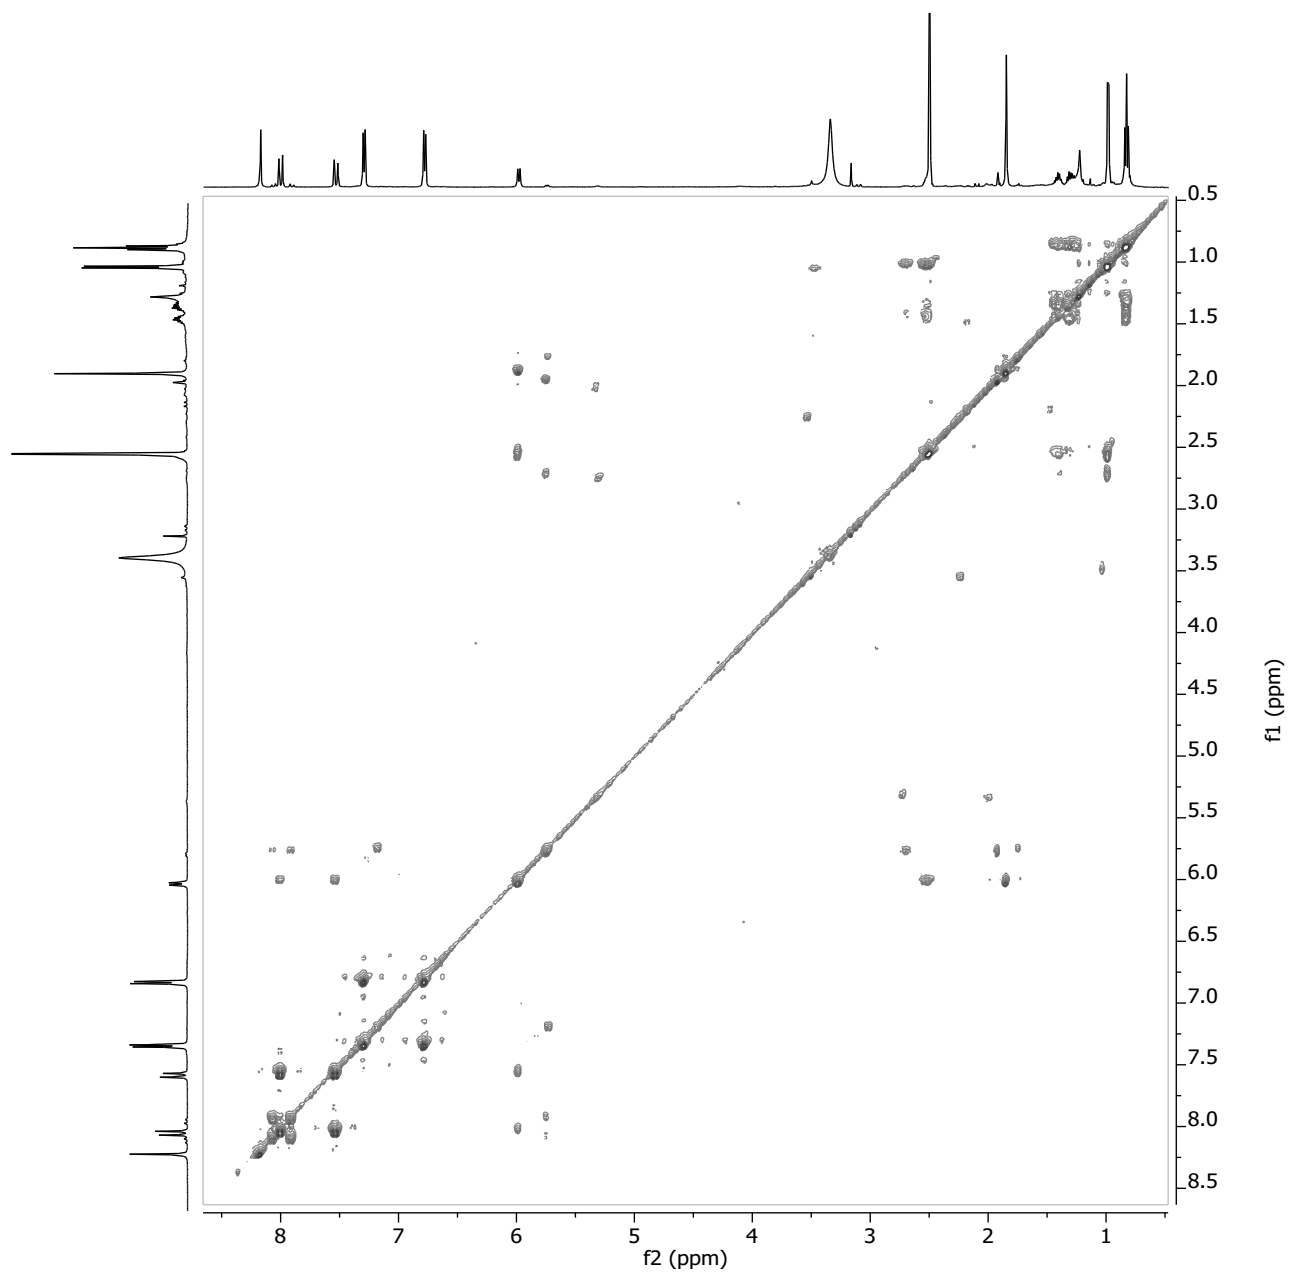

**Figure S25.**  $^1\text{H}$ - $^1\text{H}$  COSY spectrum of **4** in  $\text{DMSO}-d_6$  at 500 MHz.

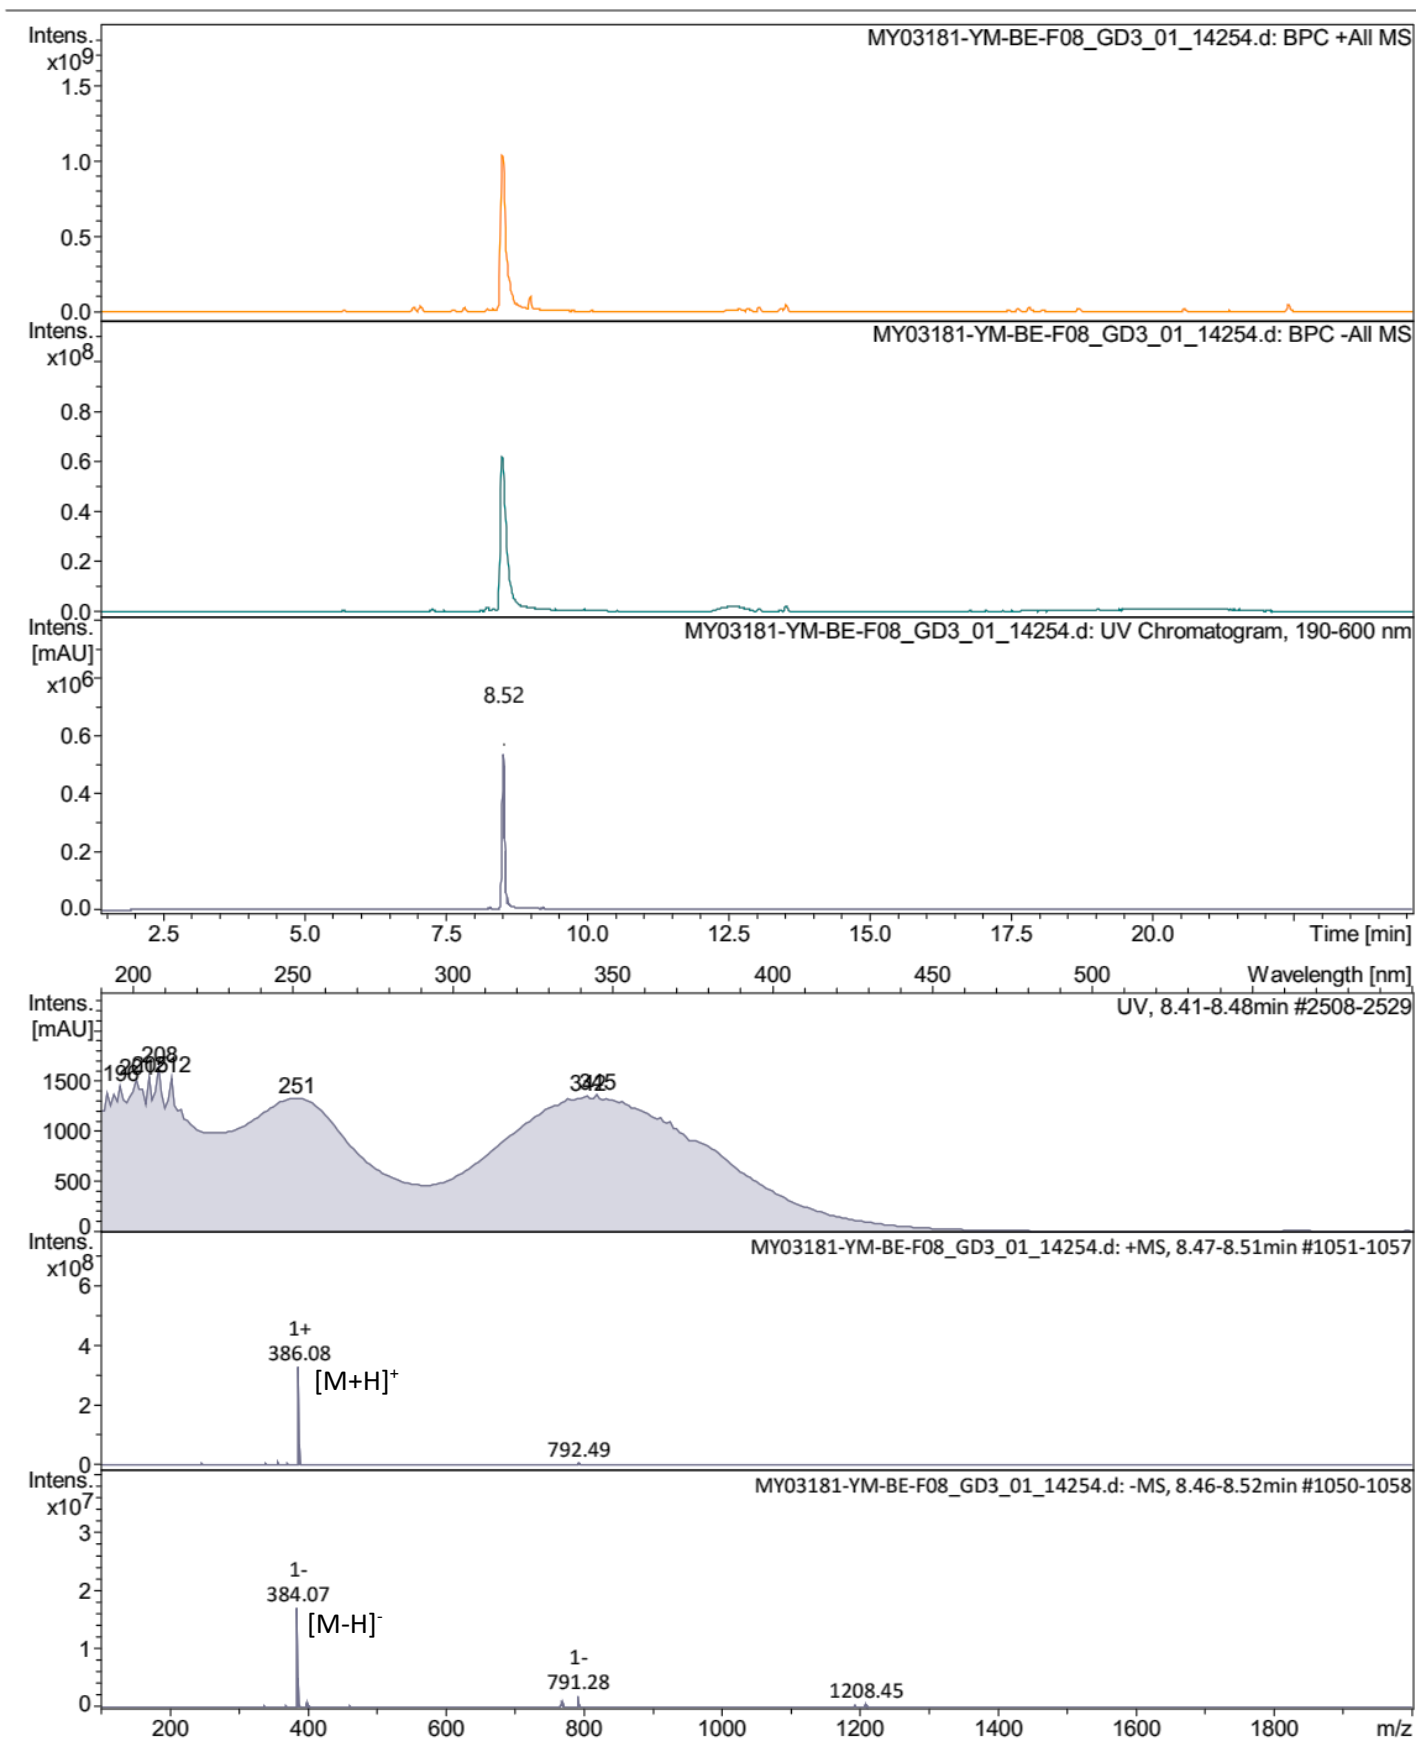

**Figure S26. LRESIMS of 5.**

## Generic Display Report

### Analysis Info

Analysis Name S:\DATA\MaXis\lto20\_Rita Toshe\23\_05\23\_05\_27\MY03181-YM-BE-F08\_87\_01\_11710.d  
Method pos\_säure\_10000\_screening\_ms\_100\_2500\_line.m  
Sample Name MY03181-YM-BE-F08  
Comment Screening01  
Waters Acquity UPLC BEH C<sub>18</sub> 1,7µm 2.1x50mm

Acquisition Date 28.05.2023 05:55:37

Operator ate06

Instrument maXis

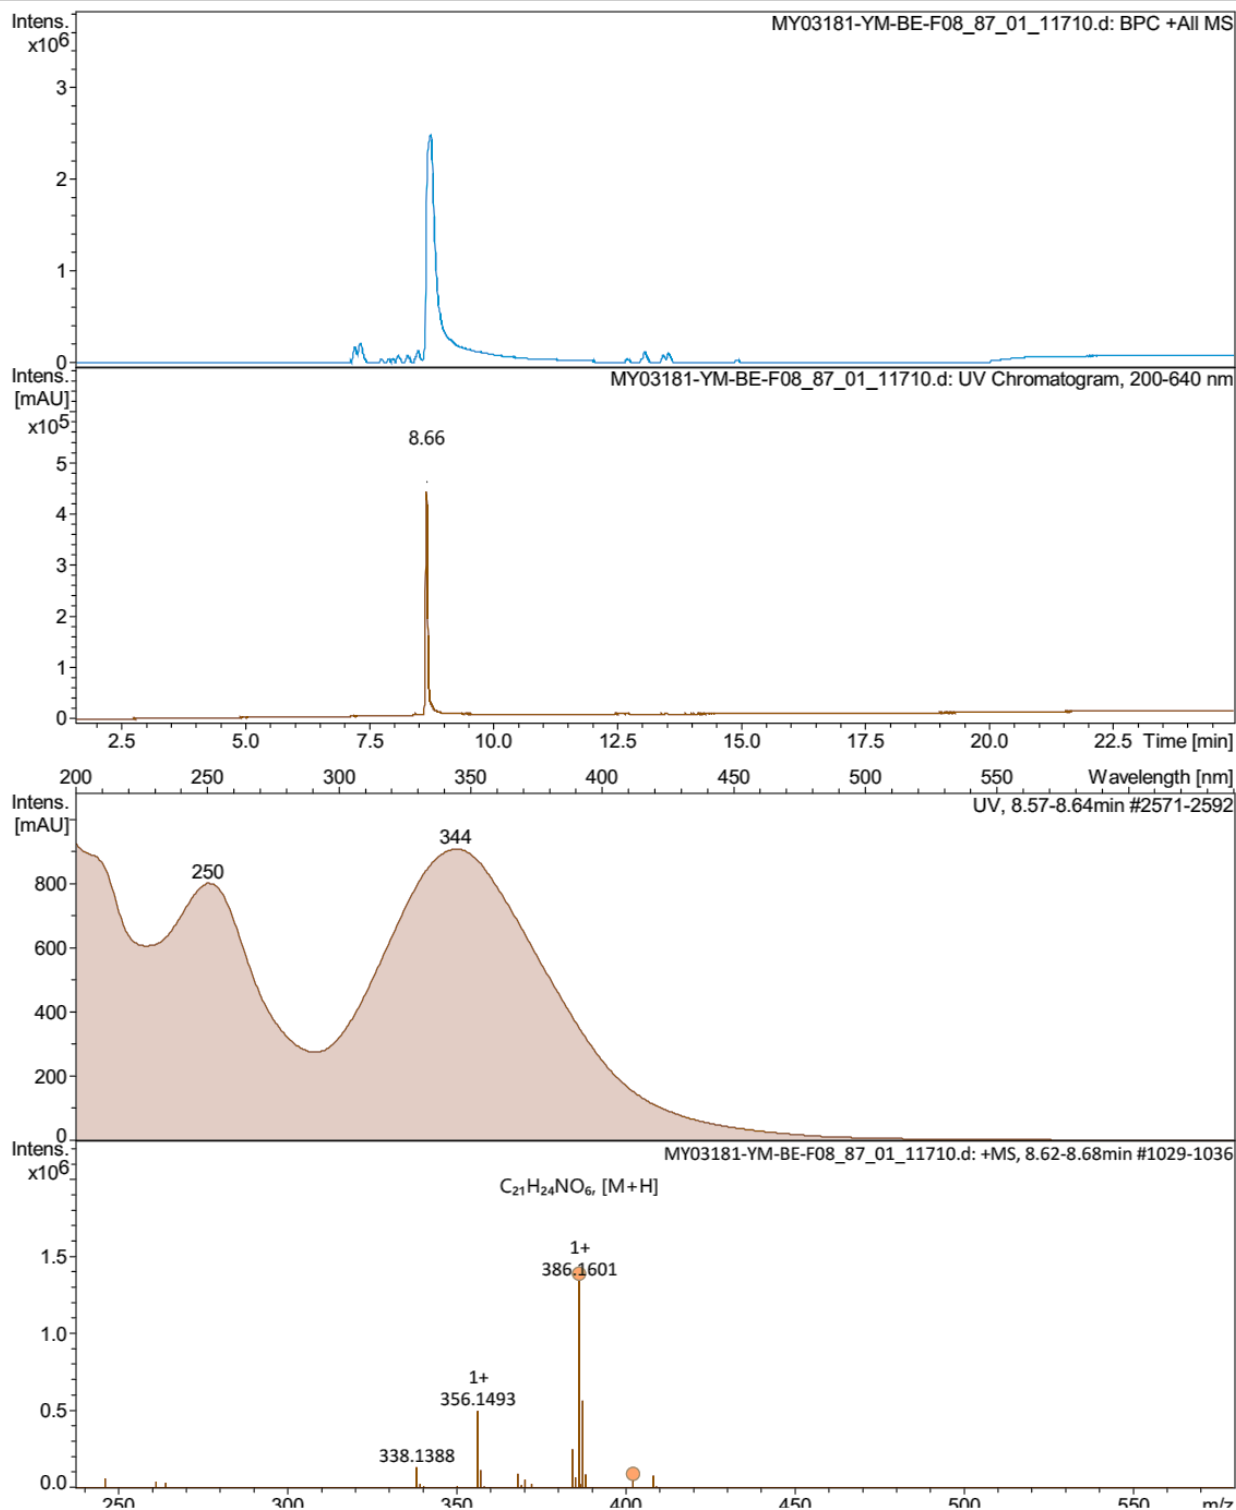

Figure S27. HRESIMS of 5.

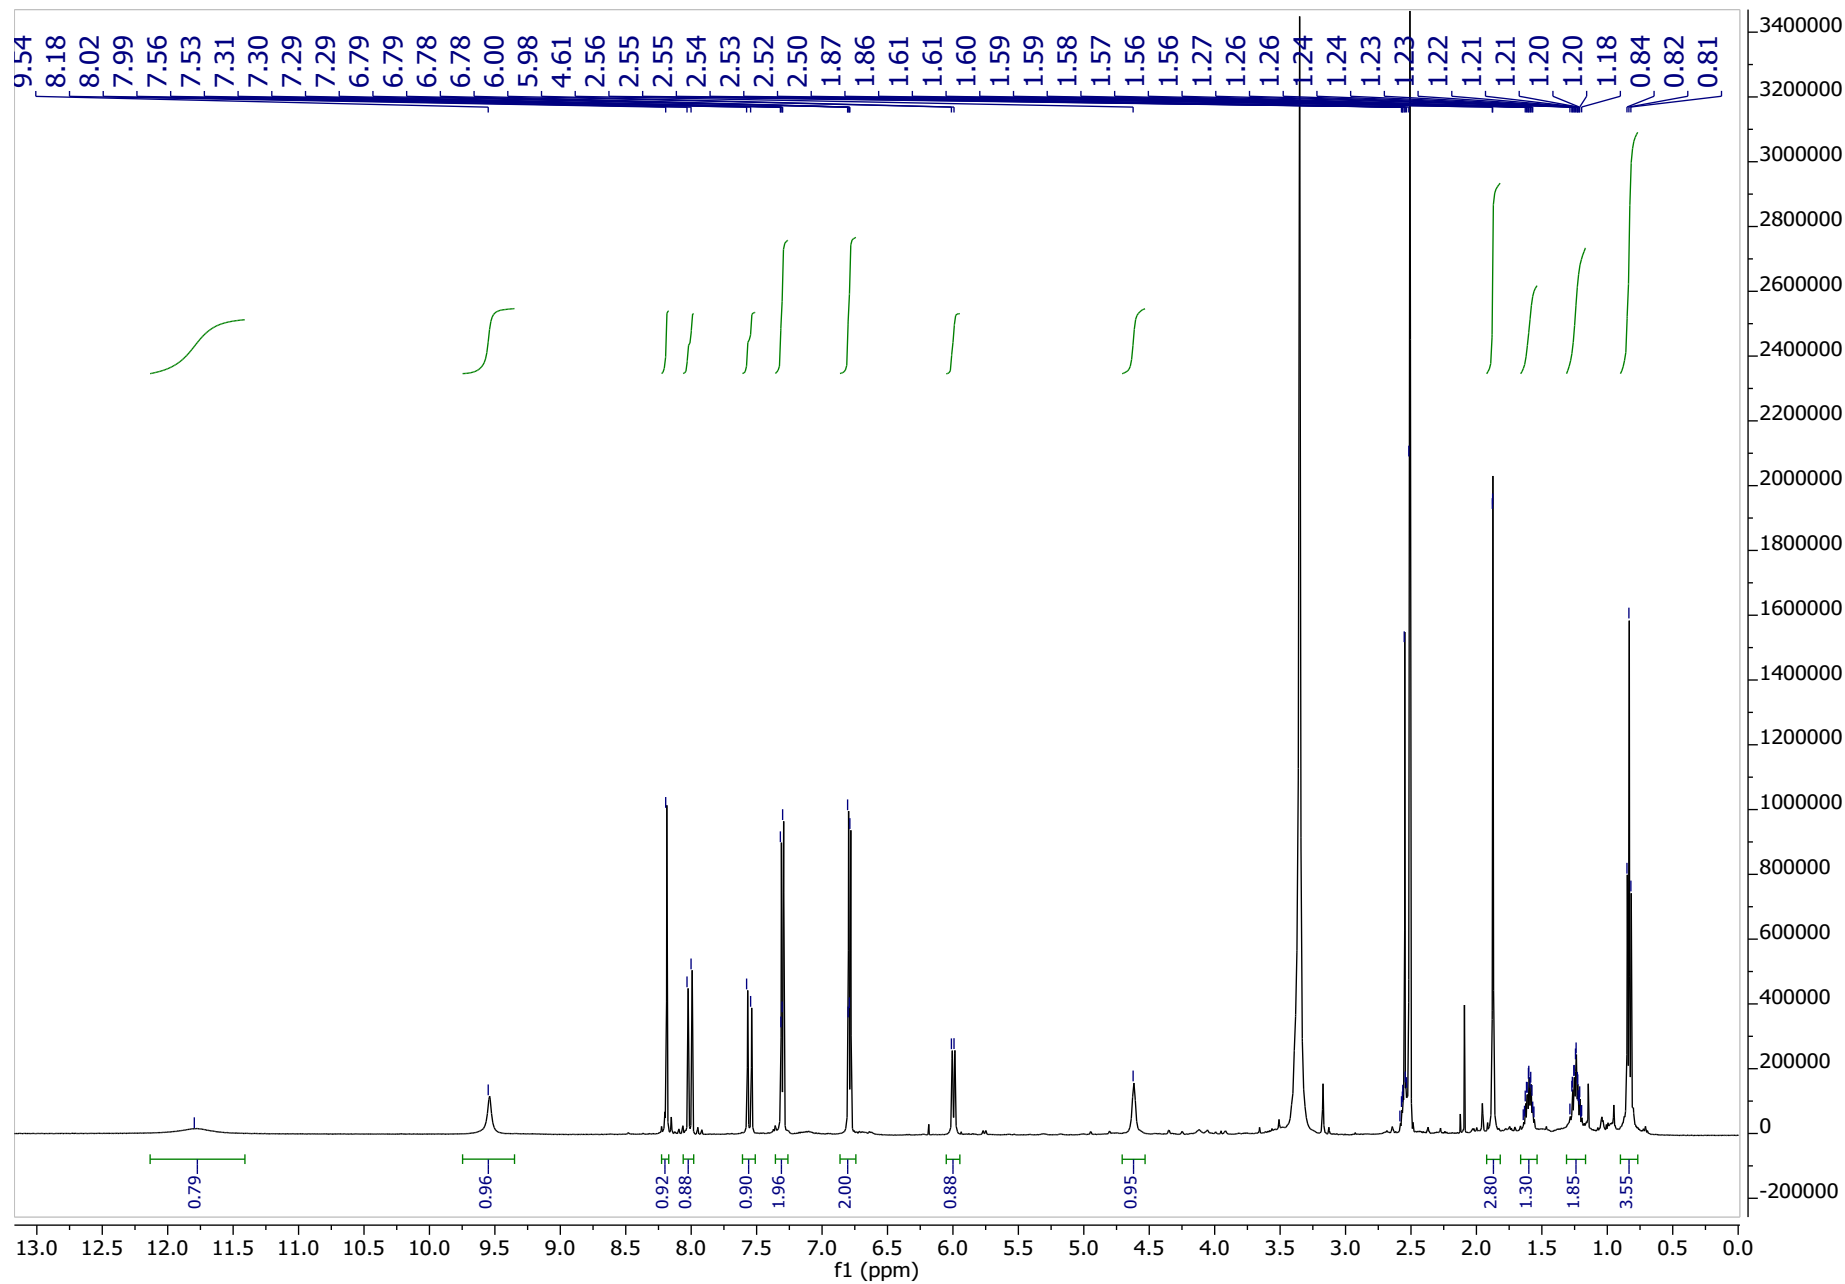

**Figure S28.**  $^1\text{H}$  NMR spectrum of **5** in  $\text{DMSO}-d_6$  at 500 MHz.

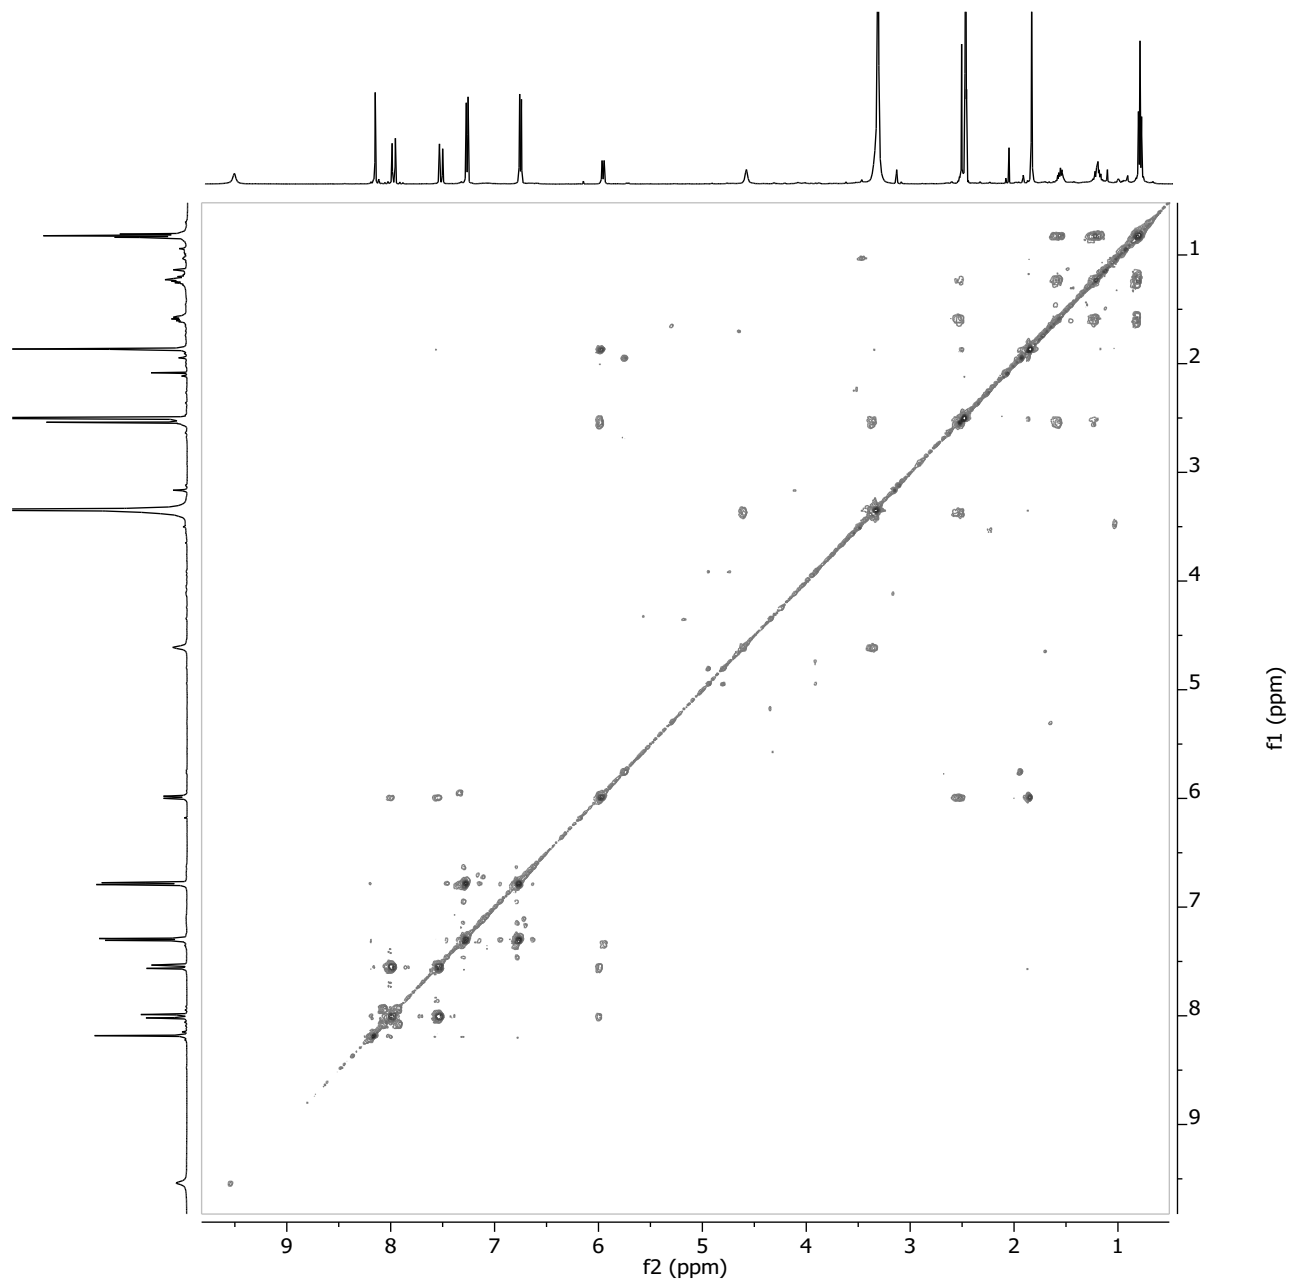

**Figure S29.**  $^1\text{H}$ - $^1\text{H}$  COSY spectrum of **5** in  $\text{DMSO}-d_6$  at 500 MHz.

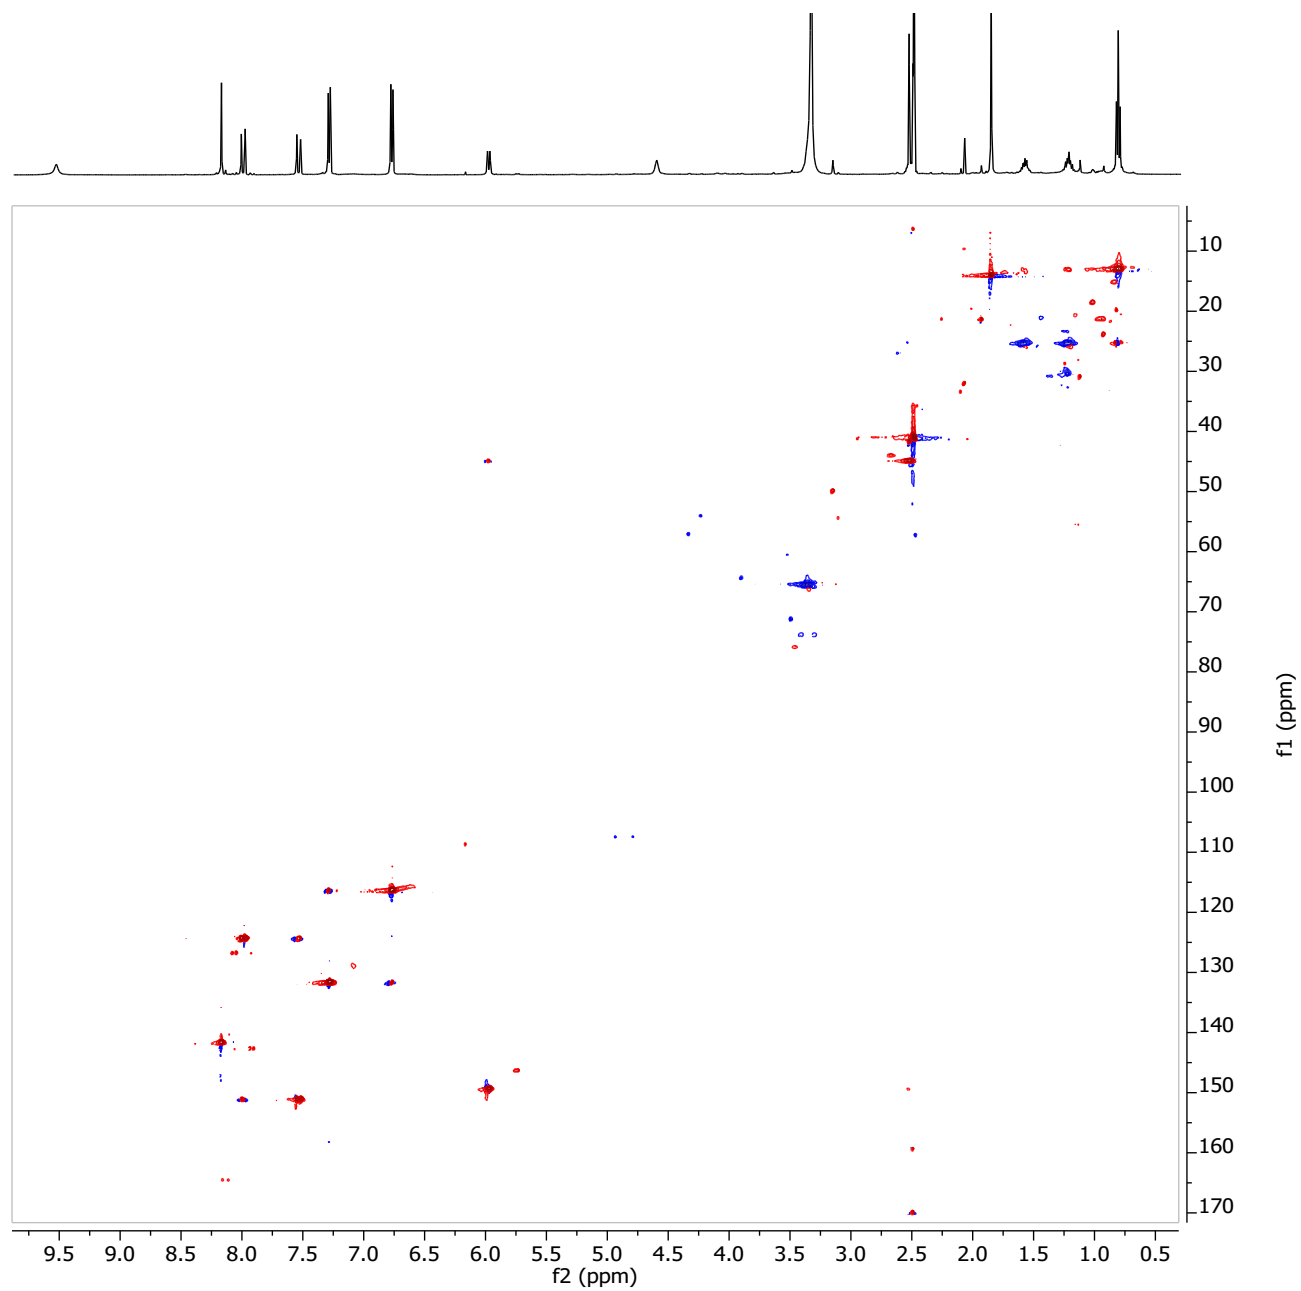

**Figure S30.** HSQC spectrum of **5** in DMSO-*d*<sub>6</sub> at 500 MHz.

# Generic Display Report

## Analysis Info

Analysis Name S:\DATA\MaXis\rt020\_Rita Toshe\23\_05\MY03181-YM-CE-F13\_19\_01\_11509.d  
Method pos\_säure\_10000\_screening\_ms\_100\_2500\_line.m  
Sample Name MY03181-YM-CE-F13  
Comment Screening01  
Waters Acquity UPLC BEH C<sub>18</sub> 1,7µm 2.1x50mm

Acquisition Date 10.05.2023 17:07:33

Operator ate06  
Instrument maXis

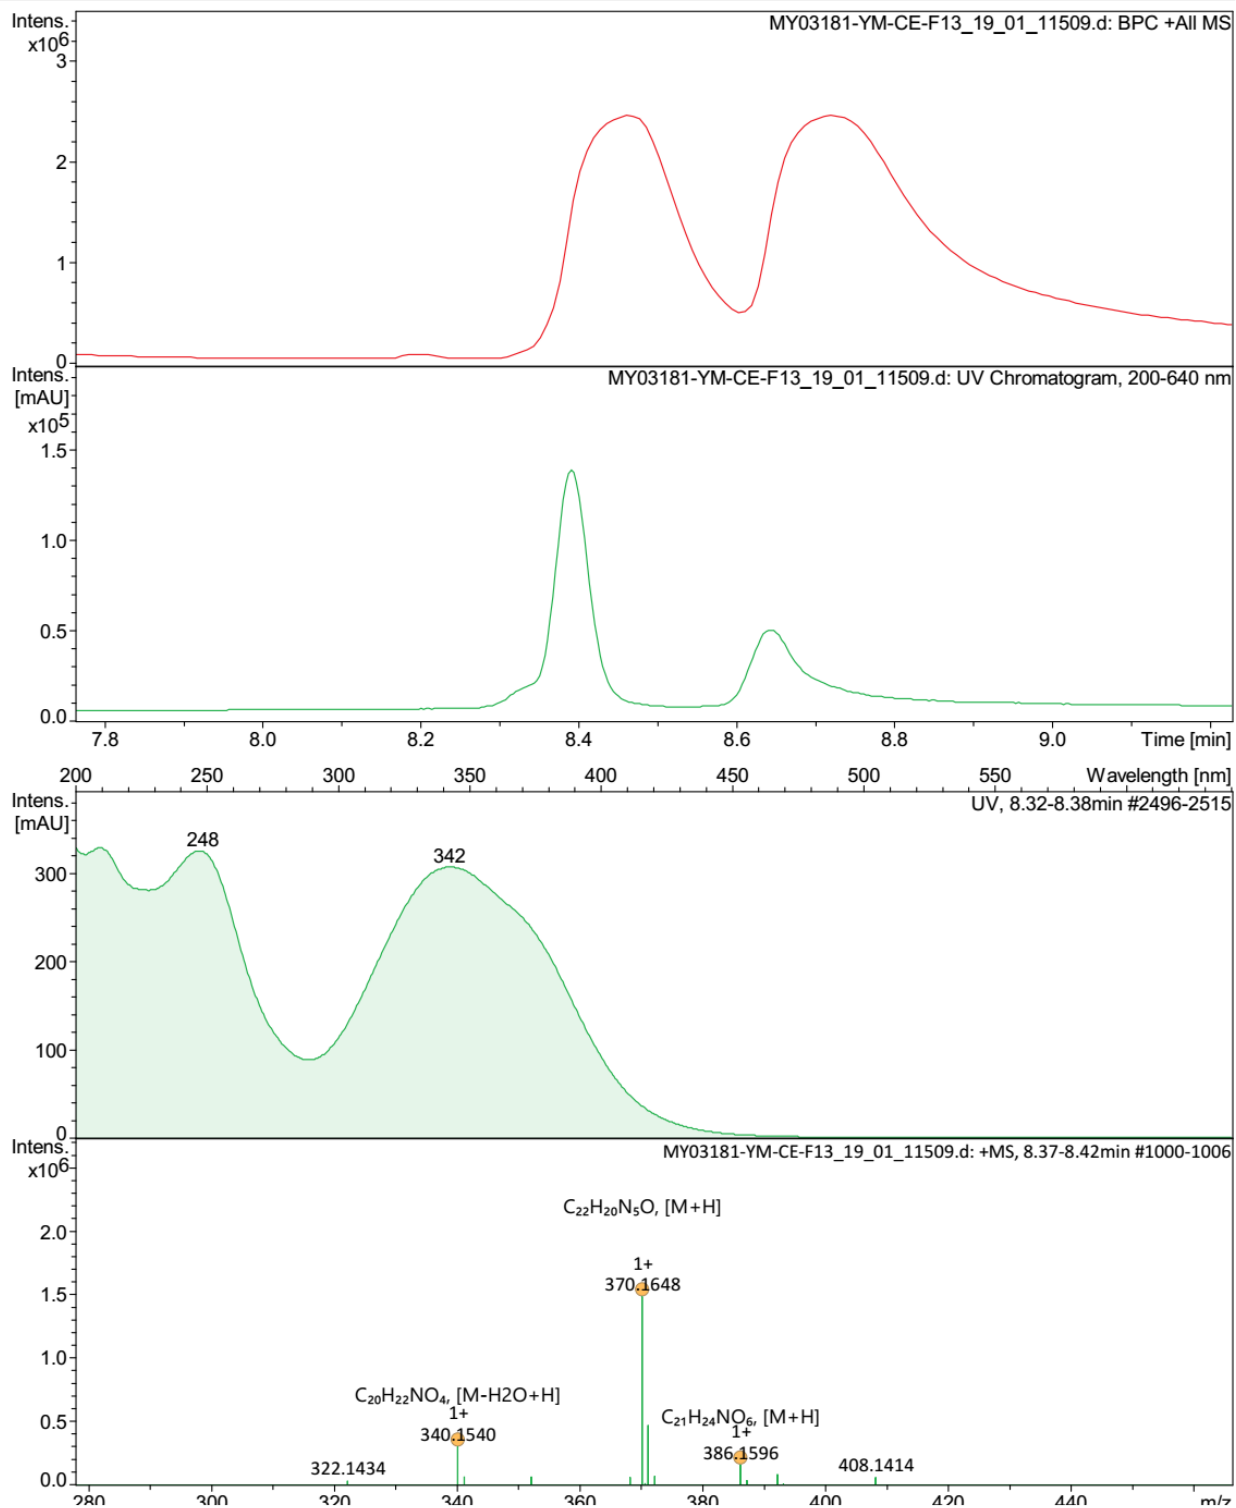

Figure S31. HRESIMS of 6.

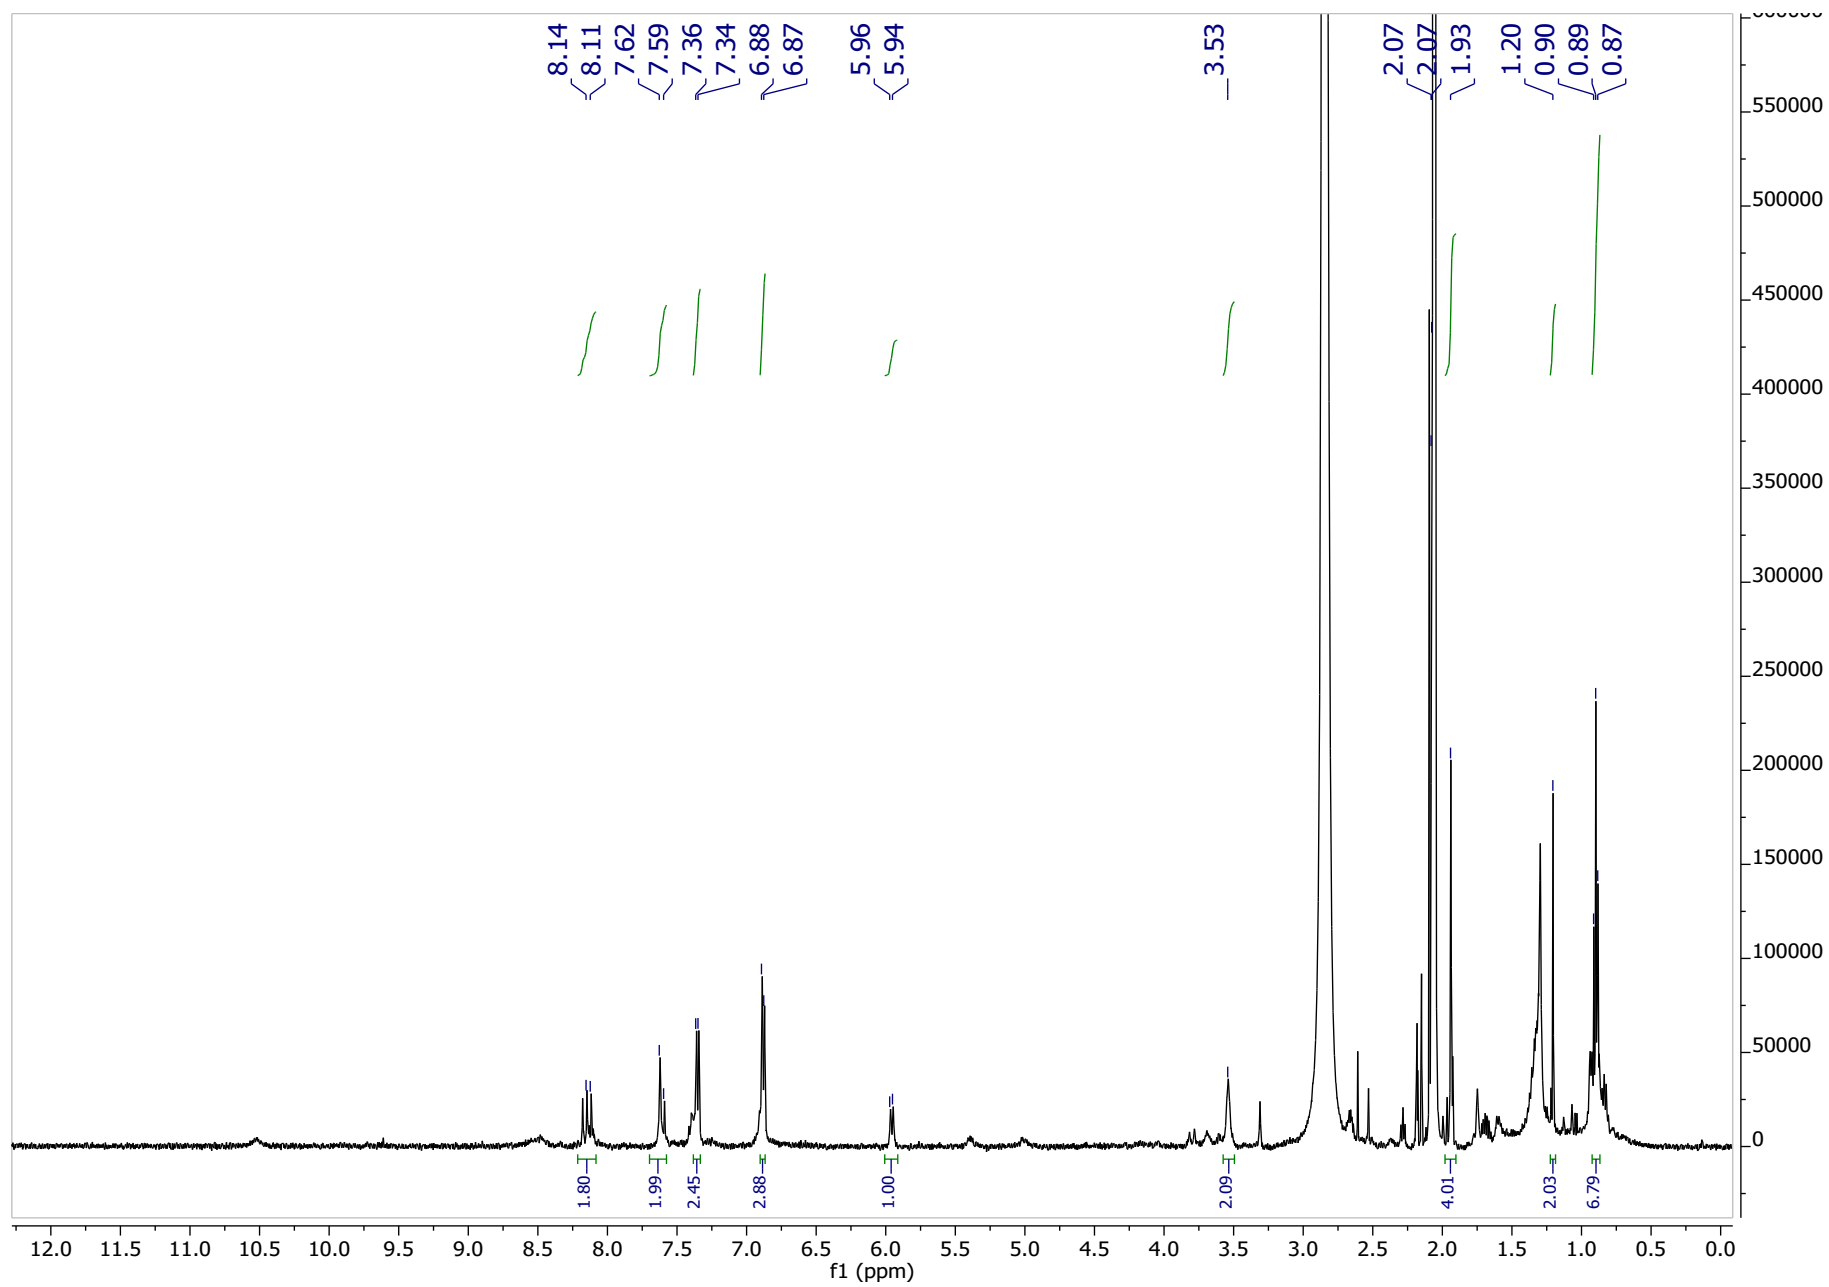

**Figure S32.**  $^1\text{H}$  NMR spectrum of **6** in  $\text{DMSO}-d_6$  at 500 MHz.



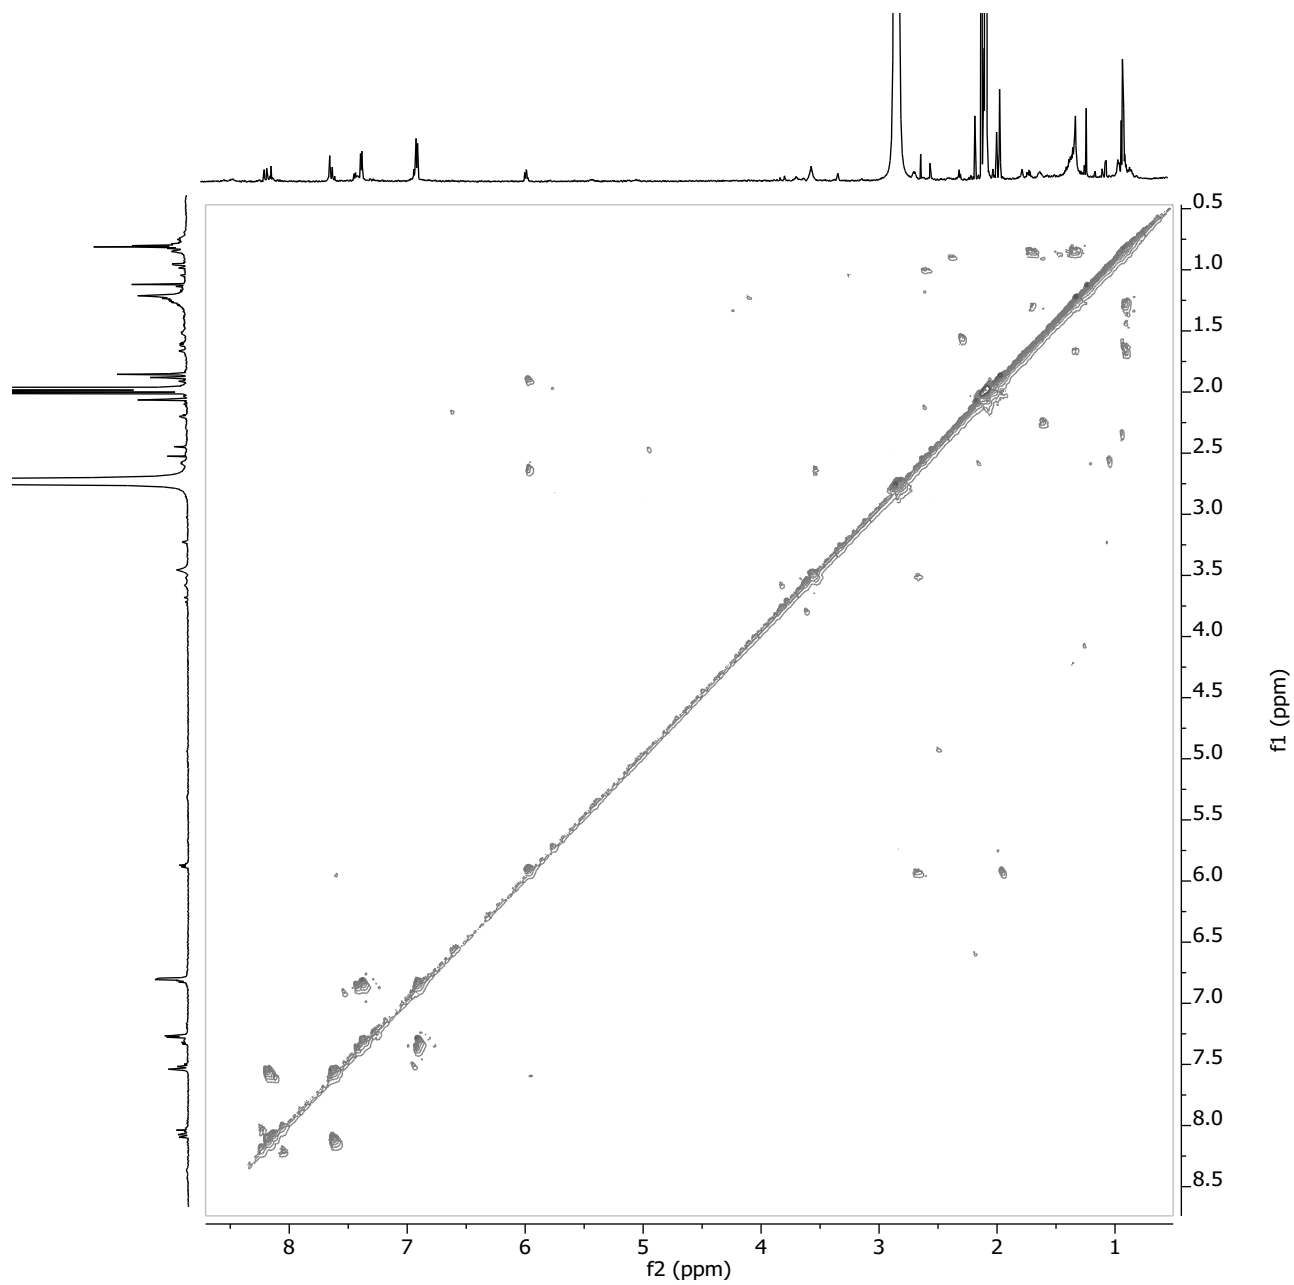

**Figure S33.**  $^1\text{H}$ - $^1\text{H}$  COSY spectrum of **6** in  $\text{DMSO}-d_6$  at 500 MHz.

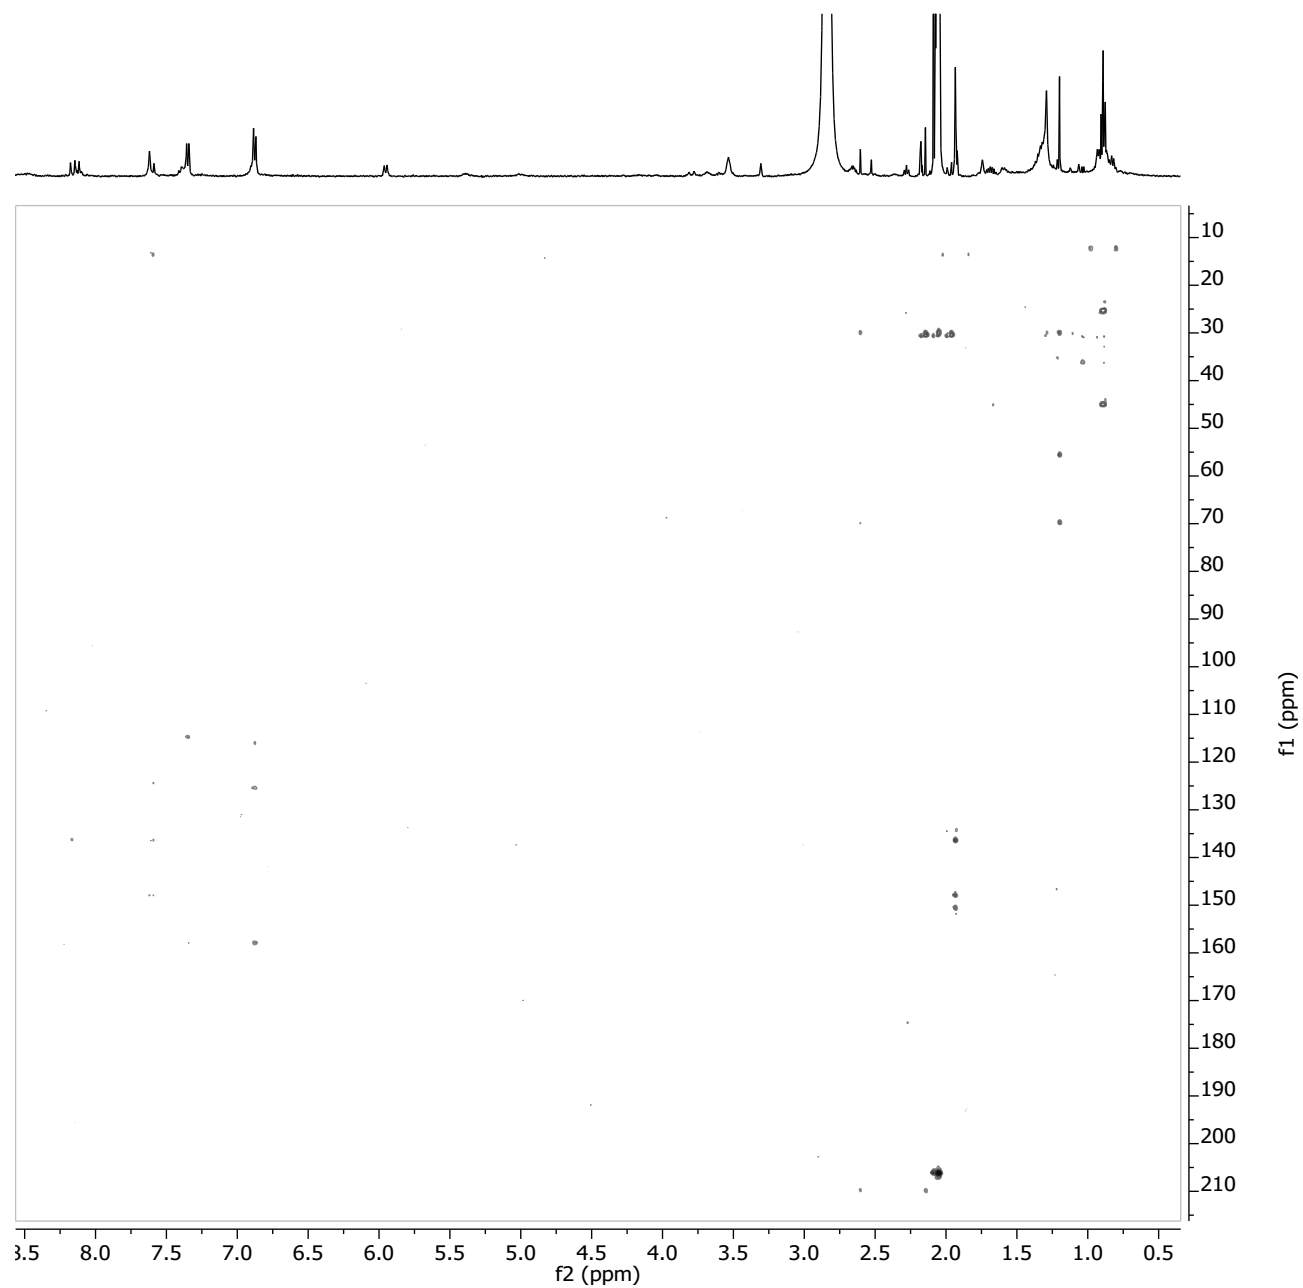

**Figure S34.** HMBC spectrum of **6** in DMSO-*d*<sub>6</sub> at 500 MHz.

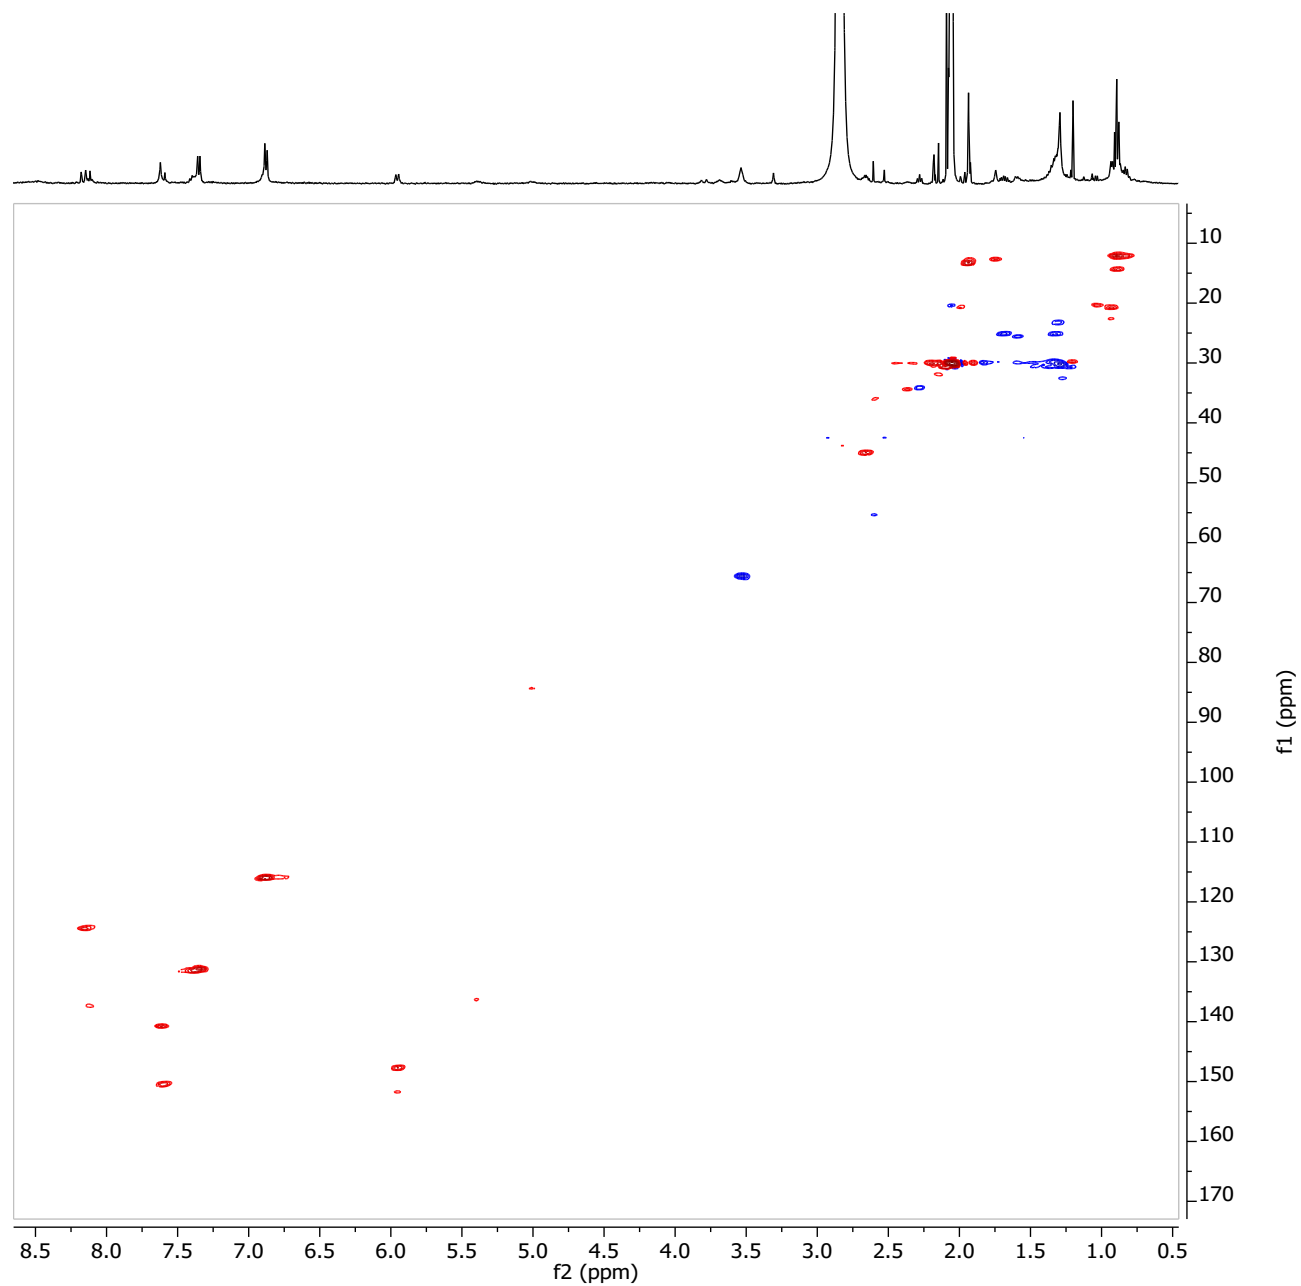

**Figure S35.** HSQC spectrum of **6** in DMSO- $d_6$  at 500 MHz.
